# Supplementary material for: Probing the eukaryotic microbes of ruminants with a deep-learning classifier and comprehensive protein databases
Source: HighWire-hosted journal article supplement (doi:10.1101/gr.279825.124), 2024-12-27
Supplement: Supplemental_Code.docx [file Supplemental_Code.docx]

GutEuk.py

#!/usr/bin/env python3

# Author: Ming Yan, The Ohio State University

import os

import re

import time

import shutil

import utils

import glob

import torch

import argparse

import logging

import subprocess

import multiprocessing

import numpy as np

import pandas as pd

from Bio import SeqIO

from pathlib import Path

from datetime import datetime

from torch.utils.data import DataLoader

description = '''\

GutEuk -- A deep-learning-based two-stage classifier to distinguish contigs/MAGs of prokaryotes, fungi or protozoa origins.

Designed specifically for gut microbiome.

In the first stage, the inputs are classified as either prokaryotes or eukaryotes origin (fungi or protozoa).

In the second stage, the eukaryotic sequences are further classified as either fungi or protozoa.

'''

Usage = '''Usage: GutEuk -i <input_file> -o <output_dir> [options]/ GutEuk -h.

To run GutEuk on a test dataset: GutEuk -i test/test.fa -o ./'''

parser = argparse.ArgumentParser(description = description, usage = Usage)

parser.add_argument(

"-i",

"--input",

metavar="input",

help='''The path to the contigs file (FASTA or gzipped FASTA).

If -b/--bin is provided, the input should be the dir containing individual bins (MAGs).''',

type=str,

required=True

)

parser.add_argument(

"-b",

"--bin",

help="If provided, treat individual FASTA files as bins instead of contigs",

required=False,

action='store_true'

)

parser.add_argument(

"-s1",

"--stage1_confidence",

metavar="stage1 confidence level",

help='''Confidence level for stage1 classification:

e.g. -s1 0.6: only give predictions when 60 percents of the input contig/bin fragments are classified as the same category.

Default: 0.5.

''',

required=False,

type=float,

default=0.5

)

parser.add_argument(

"-s2",

"--stage2_confidence",

metavar="stage2 confidence level",

help='''Confidence level for stage2 classification:

e.g. -s2 0.6: only give predictions when 60 percents of the input contig/bin fragments are classified as the same category.

Default: 0.5.

''',

required=False,

type=float,

default=0.5

)

parser.add_argument(

"-o",

"--output_dir",

metavar="output",

help='''A path to output files.

If -b/--bin is provided, the output is a csv file containing prediction results for the input bins (MAGs)''',

default=None,

required=True

)

parser.add_argument(

"-m",

"--min_len",

help=f"""Minimum length of a sequence. Sequences shorter than min_len are discarded.

Default: 5000 bp.""",

type=int,

default=5000

)

parser.add_argument(

"-t", "--threads", help="Number of threads used. Default: 1.", type=int, default=1

)

parser.add_argument(

"--to_fasta", help="Write predicted results to fasta files (for contigs only)", action='store_true'

)

args = parser.parse_args()

def main():

# config variables

## setting

input_fasta = os.path.normpath(args.input)

fasta_filename = os.path.basename(args.input)

output_dir = os.path.normpath(args.output_dir)

min_length = args.min_len

to_fasta = args.to_fasta

input_bin = args.bin

if input_bin:

tmp_dir = f"{output_dir}/tmp"

else:

fasta_filename_trailing_removed = re.search(r"(.*).(fa|fasta|fna)$", fasta_filename).group(1)

tmp_dir = os.path.normpath(f"{output_dir}/{fasta_filename_trailing_removed}_GutEuk_tmp")

threads = args.threads

s1 = args.stage1_confidence

s2 = args.stage2_confidence

## mise

start_time = str(datetime.now()).split('.')[0]

time_spent_start = time.time()

## results related

### in case of input length greater than 5000, record the origins and results of each 5000 bp fragment

### the majority rule is used for the final assignment

seq_origin = {}

seq_assignment = {}

if os.path.exists(output_dir):

pass

else:

os.mkdir(output_dir)

# create a log file, overwrite if existed

if input_bin:

logfile = f"{fasta_filename}_GutEuk_log.txt"

else:

logfile = f"{output_dir}/{fasta_filename_trailing_removed}_GutEuk_log.txt"

if os.path.exists(logfile):

os.remove(logfile)

logging.basicConfig(filename=os.path.join(logfile), level=logging.INFO, format='%(message)s')

logging.info(f"{parser.description}")

# create tmp dir

try:

os.mkdir(f'{tmp_dir}')

except FileExistsError:

pass

# preprocessing

def preprocessing(input_fasta, tmp_dir, threads, min_length):

## split fasta into multiple

utils.split_fasta_parallel(input_fasta, tmp_dir, threads)

## fasta to int-encoded

utils.fasta_int_encoded_parellel(tmp_dir, threads, min_length)

## convert int-encoded csv to kmerfre array and onehot-encoded array

## the resultant arrays could be used for prediction

utils.save_npz_parellel(tmp_dir, threads)

def preprocessing_bin_dir(bin_fasta, tmp_dir, min_length, threads):

utils.preprocessing_bin_parellel(bin_fasta, tmp_dir, min_length, threads)

# prediction for inidividual fragment

def prediction(tmp_dir):

indexs = [f.split("forward_")[1].split(".npz")[0] for f in glob.glob(f"{tmp_dir}/forward*.npz")]

for index in indexs:

utils.predict(tmp_dir, index)

# organize fragment prediction results and generate final output

def generate_final_output(tmp_dir):

seqorigin = glob.glob(f"{tmp_dir}/seqorigin*.csv")

stage1_res = glob.glob(f"{tmp_dir}/input_fasta_*_stage1_out.csv")

stage2_res = glob.glob(f"{tmp_dir}/input_fasta_*_stage2_out.csv")

if len(seqorigin) == 1:

seqorigin_df = pd.read_csv(seqorigin[0])

stage1_df = pd.read_csv(stage1_res[0])

stage2_df = pd.read_csv(stage2_res[0])

else:

seqorigin_df = pd.concat([pd.read_csv(f) for f in seqorigin])

stage1_df = pd.concat([pd.read_csv(f) for f in stage1_res])

stage2_df = pd.concat([pd.read_csv(f) for f in stage2_res])

stage1_res = pd.merge(seqorigin_df, stage1_df, on = "seq")

stage2_res = pd.merge(seqorigin_df, stage2_df, on = "seq")

stage1_final_prediction = {}

stage1_confidence_dic = {}

for f in set(stage1_res.origin):

df = stage1_res.query('origin == @f')

# if the input sequence unfragmented (seq length < 10,000 bp)

if len(df) == 1:

prediction = list(df.predict)[0]

stage1_final_prediction[f] = prediction

stage1_confidence_dic[f] = 1

# if the input sequence fragmented, the final prediction for the original sequence determined based on the majority rule

else:

prediction = list(df.predict)

prediction_pro = prediction.count("prokaryotes")

prediction_euk = prediction.count("eukaryotes")

stage1_confidence = max(prediction_euk,prediction_pro) / (prediction_pro + prediction_euk)

stage1_confidence_dic[f] = stage1_confidence

if stage1_confidence > s1:

if prediction_pro > prediction_euk:

stage1_final_prediction[f] = "prokaryotes"

else:

stage1_final_prediction[f] = "eukaryotes"

else:

stage1_final_prediction[f] = "undetermined"

stage2_final_prediction = {}

stage2_confidence_dic = {}

for f in set(stage2_res.origin):

df = stage2_res.query('origin == @f')

if len(df) == 1:

prediction = list(df.predict)[0]

stage2_final_prediction[f] = prediction

stage2_confidence_dic[f] = 1

else:

prediction = list(df.predict)

prediction_fungi = prediction.count("fungi")

prediction_protozoa = prediction.count("protozoa")

stage2_confidence = max(prediction_protozoa,prediction_fungi) / (prediction_protozoa + prediction_fungi)

stage2_confidence_dic[f] = stage2_confidence

if stage2_confidence > s2:

if prediction_fungi > prediction_protozoa:

stage2_final_prediction[f] = "fungi"

else:

stage2_final_prediction[f] = "protozoa"

else:

stage2_final_prediction[f] = "undetermined"

stage1_final_prediction_df = pd.DataFrame.from_dict(stage1_final_prediction, orient = "index").rename(columns = {0:"stage1_prediction"})

stage2_final_prediction_df = pd.DataFrame.from_dict(stage2_final_prediction, orient = "index").rename(columns = {0:"stage2_prediction"})

stage1_confidence_df = pd.DataFrame.from_dict(stage1_confidence_dic, orient = "index").rename(columns = {0:"stage1_confidence"})

stage2_confidence_df = pd.DataFrame.from_dict(stage2_confidence_dic, orient = "index").rename(columns = {0:"stage2_confidence"})

final_output_tmp1 = pd.merge(stage1_final_prediction_df, stage2_final_prediction_df, left_index = True, right_index = True, how="left")

final_output_tmp2 = pd.merge(final_output_tmp1, stage1_confidence_df, left_index = True, right_index = True, how="left")

final_output = pd.merge(final_output_tmp2, stage2_confidence_df, left_index = True, right_index = True, how="left")

final_output.reset_index(names = "sequence_id", inplace = True)

final_output.stage2_prediction = final_output.stage2_prediction.fillna("prokaryotes")

final_output.loc[list(final_output.query("stage1_prediction == 'prokaryotes'").index), "stage2_prediction"] = "prokaryotes"

final_output.loc[list(final_output.query("stage1_prediction == 'prokaryotes'").index), "stage2_confidence"] = 0

final_output.loc[list(final_output.query("stage1_prediction == 'undetermined'").index), "stage2_prediction"] = "undetermined"

final_output.loc[list(final_output.query("stage1_prediction == 'undetermined'").index), "stage2_confidence"] = 0

return final_output

def generate_final_output_for_bins(tmp_dir):

bin_list = []

stage1_predict = []

stage2_predict = []

stage1_confidence = []

stage2_confidence = []

for _ in glob.glob(f"{tmp_dir}/*"):

Bin = _.split("/")[-1]

bin_list.append(Bin)

stage1_df_list = []

stage2_df_list = []

for stage1_out in glob.glob(f"{tmp_dir}/{Bin}/*stage1*.csv"):

stage1_df_list.append(pd.read_csv(stage1_out))

stage1_df = pd.concat(stage1_df_list)

if len(stage1_df) == 0:

logging.info(f"{Bin} does not have any contig that is longer than the minimal contig length")

stage1_predict.append("NA")

stage1_confidence.append("NA")

else:

eukaryotes_percent = len(stage1_df.query('predict == "eukaryotes"'))/len(stage1_df)

prokaryotes_percent = 1 - eukaryotes_percent

if eukaryotes_percent > prokaryotes_percent:

if eukaryotes_percent > s1:

stage1_predict.append("eukaryotes")

stage1_confidence.append(eukaryotes_percent)

else:

stage1_predict.append("undetermined")

stage1_confidence.append("NA")

elif eukaryotes_percent == prokaryotes_percent:

stage1_predict.append("undetermined")

stage1_confidence.append("NA")

else:

if prokaryotes_percent > s1:

stage1_predict.append("prokaryotes")

stage1_confidence.append(prokaryotes_percent)

else:

stage1_predict.append("undetermined")

stage1_confidence.append("NA")

if stage1_predict[-1] != "eukaryotes":

stage2_predict.append("NA")

stage2_confidence.append("NA")

else:

for stage2_out in glob.glob(f"{tmp_dir}/{Bin}/*stage2*.csv"):

stage2_df_list.append(pd.read_csv(stage2_out))

stage2_df = pd.concat(stage2_df_list)

if len(stage2_df) == 0:

stage2_predict.append("NA")

stage2_confidence.append("NA")

else:

fungi_percent = len(stage2_df.query('predict == "fungi"'))/len(stage1_df)

protozoa_percent = 1 - fungi_percent

if fungi_percent > protozoa_percent:

if fungi_percent > s2:

stage2_predict.append("fungi")

stage2_confidence.append(fungi_percent)

else:

stage2_predict.append("undetermined")

stage2_confidence.append("NA")

elif fungi_percent == protozoa_percent:

stage2_predict.append("undetermined")

stage2_confidence.append("NA")

else:

if protozoa_percent > s2:

stage2_predict.append("protozoa")

stage2_confidence.append(protozoa_percent)

else:

stage2_predict.append("undetermined")

stage2_confidence.append("NA")

bin_predict_out = pd.DataFrame.from_dict({"bin":bin_list, "stage1_prediction":stage1_predict, "stage1_confidence":stage1_confidence, "stage2_prediction":stage2_predict, "stage2_confidence":stage2_confidence })

return bin_predict_out

def write_to_fasta(final_output):

prokaryotes = list(final_output.query('stage1_prediction == "prokaryotes"').sequence_id)

eukaryotes = list(final_output.query('stage1_prediction == "eukaryotes"').sequence_id)

protozoa = list(final_output.query('stage2_prediction == "protozoa"').sequence_id)

fungi = list(final_output.query('stage2_prediction == "fungi"').sequence_id)

with open(f"{output_dir}/{fasta_filename_trailing_removed}_GutEuk_prokaryotes.fasta", "w") as prokaryotes_out:

with open(f"{output_dir}/{fasta_filename_trailing_removed}_GutEuk_eukaryotes.fasta", "w") as eukaryotes_out:

with open(f"{output_dir}/{fasta_filename_trailing_removed}_GutEuk_protozoa.fasta", "w") as protozoa_out:

with open(f"{output_dir}/{fasta_filename_trailing_removed}_GutEuk_fungi.fasta", "w") as fungi_out:

records = SeqIO.parse(f"{input_fasta}", "fasta")

for record in records:

if record.id in prokaryotes:

SeqIO.write(record, prokaryotes_out, "fasta")

elif record.id in eukaryotes:

SeqIO.write(record, eukaryotes_out, "fasta")

if record.id in protozoa:

SeqIO.write(record, protozoa_out, "fasta")

elif record.id in fungi:

SeqIO.write(record, fungi_out, "fasta")

preprocessing_start = time.time()

if input_bin:

# preprocessing/formating

Bins = glob.glob(f"{input_fasta}/*.fa") + glob.glob(f"{input_fasta}/*.fasta") + glob.glob(f"{input_fasta}/*.fna")

for Bin in Bins:

bin_basename = re.search(r"(.*).(fa|fasta|fna)$", Bin.split("/")[-1]).group(1)

Bin = re.search(r"(.*).(fa|fasta|fna)$", Bin).group(1) + ".fasta"

try:

os.mkdir(f"{tmp_dir}/{bin_basename}")

except FileExistsError:

pass

preprocessing_bin_dir(Bins, tmp_dir, min_length, threads)

preprocessing_end = time.time()

logging.info(f"Preprocessing finished in {preprocessing_end - preprocessing_start:.2f} secs")

# prediction

prediction_start = time.time()

for bin_dir in glob.glob(f"{tmp_dir}/*"):

utils.prediction_bin(bin_dir)

bin_level_predict_out = generate_final_output_for_bins(tmp_dir)

bin_level_predict_out.to_csv(f"{output_dir}/{fasta_filename}_GutEuk_output.csv", index = None)

else:

# unzip {input_fasta} if zipped

if input_fasta.endswith(".gz"):

copy = f"cp {input_fasta} {tmp_dir}"

gunzip = f"gunzip {tmp_dir}/{fasta_filename}"

subprocess.run(copy, shell=True, check=True, text=True)

subprocess.run(gunzip, shell=True, check=True, text=True)

fasta_filename = fasta_filename.strip(".gz")

input_fasta = os.path.join(tmp_dir, fasta_filename)

else:

copy = f"cp {input_fasta} {tmp_dir}"

seqlength = {}

records = SeqIO.parse(input_fasta, "fasta")

for record in records:

seqid = str(record.id)

seqlen = len(record.seq)

seqlength[seqid] = seqlen

seqlength_df = pd.DataFrame.from_dict(seqlength, orient = "index").reset_index(names = "sequence_id").rename(columns = {0:"contig_length"})

preprocessing(input_fasta, tmp_dir, threads, min_length)

preprocessing_end = time.time()

logging.info(f"Preprocessing finished in {preprocessing_end - preprocessing_start:.2f} secs")

prediction_start = time.time()

prediction(tmp_dir)

final_output_tmp = generate_final_output(tmp_dir)

final_output_tmp['sequence_id'] = final_output_tmp['sequence_id'].astype(str)

seqlength_df['sequence_id'] = seqlength_df['sequence_id'].astype(str)

final_output = pd.merge(final_output_tmp, seqlength_df, on = "sequence_id")

final_output.to_csv(f"{output_dir}/{fasta_filename_trailing_removed}_GutEuk_output.csv", index = None)

if to_fasta:

write_to_fasta(final_output)

prediction_end = time.time()

logging.info(f"Prediction finished in {prediction_end - prediction_start:.2f} secs")

# clearn up, remove tmp dir

try:

shutil.rmtree(f"{tmp_dir}")

except Exception as e:

print(f"Unexpected error: {e}")

end_time = str(datetime.now()).split('.')[0]

time_spent_end = time.time()

logging.info(f"Start: {start_time}")

logging.info(f"End: {end_time}")

logging.info(f"Time spent: {time_spent_end - time_spent_start:.2f}")

if __name__ == "__main__":

main()

from Bio import SeqIO

from Bio.Seq import Seq

def remove_telomeres(input_fasta, output_fasta, telomere_seq="TTAGGG"):

"""

Removes telomere sequences from the start and end of sequences in a FASTA file.

Parameters:

input_fasta (str): Path to the input FASTA file.

output_fasta (str): Path to the output FASTA file with telomeres removed.

telomere_seq (str): Telomere repeat sequence (default: "TTAGGG").

"""

telomere_len = len(telomere_seq)

reverse_complement = str(Seq(telomere_seq).reverse_complement())

with open(output_fasta, "w") as output_handle:

for record in SeqIO.parse(input_fasta, "fasta"):

seq = str(record.seq)

# Remove telomeres from the start

while seq.startswith(telomere_seq) or seq.startswith(reverse_complement):

seq = seq[telomere_len:]

# Remove telomeres from the end

while seq.endswith(telomere_seq) or seq.endswith(reverse_complement):

seq = seq[:-telomere_len]

# Update the sequence and write to the output

record.seq = Seq(seq)

SeqIO.write(record, output_handle, "fasta")

print(f"Telomeres removed. Processed sequences saved to {output_fasta}.")

# Example usage

#remove_telomeres("input.fasta", "output_no_telomeres.fasta", telomere_seq="TTAGGG")
