# Supplementary material for: Probing the eukaryotic microbes of ruminants with a deep-learning classifier and comprehensive protein databases
Source: HighWire-hosted journal article supplement (doi:10.1101/gr.279825.124), 2024-12-27
Supplement: Supplemental_Table_S1.xlsx [file Supplemental_Table_S1.xlsx]

## Sheet: Supplementary Table 1
Supplementary Table S1. Benchmarking results of newly sequenced human gut fungi genomes
bin	stage1_prediction	stage1_confidence	stage2_prediction	stage2_confidence
GCA_023628975.1_ASM2362897v1_genomic	eukaryotes	0.998343	fungi	0.775814
GCA_023629415.1_ASM2362941v1_genomic	eukaryotes	0.982857	fungi	0.940476
GCA_023629155.1_ASM2362915v1_genomic	eukaryotes	0.973422	fungi	0.857558
GCA_023629315.1_ASM2362931v1_genomic	eukaryotes	0.981931	fungi	0.948169
GCA_023629595.1_ASM2362959v1_genomic	eukaryotes	0.968887	fungi	0.926592
GCA_023629135.1_ASM2362913v1_genomic	eukaryotes	0.975447	fungi	0.85851
GCA_023629215.1_ASM2362921v1_genomic	eukaryotes	0.950723	fungi	0.90642
GCA_023629795.1_ASM2362979v1_genomic	eukaryotes	0.997431	fungi	0.979732
GCA_023629055.1_ASM2362905v1_genomic	eukaryotes	0.972518	fungi	0.716619
GCA_023629895.1_ASM2362989v1_genomic	eukaryotes	0.999843	fungi	0.793551
GCA_023629555.1_ASM2362955v1_genomic	eukaryotes	0.973723	fungi	0.924145
GCA_023629655.1_ASM2362965v1_genomic	eukaryotes	0.984347	fungi	0.827818
GCA_023629515.1_ASM2362951v1_genomic	eukaryotes	0.984263	fungi	0.934192
GCA_023628935.1_ASM2362893v1_genomic	eukaryotes	0.998375	fungi	0.937017
GCA_023629275.1_ASM2362927v1_genomic	eukaryotes	0.951076	fungi	0.902642
GCA_023629075.1_ASM2362907v1_genomic	eukaryotes	0.991772	fungi	0.93582
GCA_023629875.1_ASM2362987v1_genomic	eukaryotes	0.999207	fungi	0.991282
GCA_023629715.1_ASM2362971v1_genomic	eukaryotes	1	fungi	0.978875
GCA_023629735.1_ASM2362973v1_genomic	eukaryotes	0.996569	fungi	0.980206
GCA_023629435.1_ASM2362943v1_genomic	eukaryotes	0.978818	fungi	0.933005
GCA_023629375.1_ASM2362937v1_genomic	eukaryotes	0.987983	fungi	0.941484
GCA_023629095.1_ASM2362909v1_genomic	eukaryotes	0.941938	fungi	0.843234
GCA_023628955.1_ASM2362895v1_genomic	eukaryotes	0.997796	fungi	0.790083
GCA_023629495.1_ASM2362949v1_genomic	eukaryotes	0.984241	fungi	0.943171
GCA_023629355.1_ASM2362935v1_genomic	eukaryotes	0.984226	fungi	0.937859
GCA_023628915.1_ASM2362891v1_genomic	eukaryotes	1	fungi	0.889153
GCA_023629575.1_ASM2362957v1_genomic	eukaryotes	0.989831	fungi	0.953995
GCA_023629775.1_ASM2362977v1_genomic	eukaryotes	1	fungi	0.991948
GCA_023629695.1_ASM2362969v1_genomic	eukaryotes	0.990161	fungi	0.858229
GCA_023629815.1_ASM2362981v1_genomic	eukaryotes	0.999833	fungi	0.989465
GCA_023629615.1_ASM2362961v1_genomic	eukaryotes	0.984784	fungi	0.94389
GCA_023629195.1_ASM2362919v1_genomic	eukaryotes	0.986402	fungi	0.623155
GCA_023629675.1_ASM2362967v1_genomic	eukaryotes	0.989437	fungi	0.824485
GCA_023629755.1_ASM2362975v1_genomic	eukaryotes	0.999831	fungi	0.99121
GCA_023629455.1_ASM2362945v1_genomic	eukaryotes	0.982717	fungi	0.93903
GCA_023628995.1_ASM2362899v1_genomic	eukaryotes	0.999449	fungi	0.776309
GCA_023629635.1_ASM2362963v1_genomic	eukaryotes	0.969815	fungi	0.928919
GCA_023629475.1_ASM2362947v1_genomic	eukaryotes	0.989082	fungi	0.948387
GCA_023629535.1_ASM2362953v1_genomic	eukaryotes	0.981331	fungi	0.931546
GCA_023629175.1_ASM2362917v1_genomic	eukaryotes	0.970985	fungi	0.708354
GCA_023629335.1_ASM2362933v1_genomic	eukaryotes	0.983598	fungi	0.501058
GCA_023629235.1_ASM2362923v1_genomic	eukaryotes	0.950273	fungi	0.910929
GCA_023629035.1_ASM2362903v1_genomic	eukaryotes	0.985649	fungi	0.786693
GCA_023629115.1_ASM2362911v1_genomic	eukaryotes	0.99132	fungi	0.784833
GCA_023628895.1_ASM2362889v1_genomic	eukaryotes	0.999701	fungi	0.994922
GCA_023629855.1_ASM2362985v1_genomic	eukaryotes	0.999253	fungi	0.990476
GCA_023629015.1_ASM2362901v1_genomic	eukaryotes	0.997791	fungi	0.767532
GCA_023629835.1_ASM2362983v1_genomic	eukaryotes	0.999655	fungi	0.988446
GCA_023629255.1_ASM2362925v1_genomic	eukaryotes	0.95417	fungi	0.566453
GCA_023629295.1_ASM2362929v1_genomic	eukaryotes	0.948253	fungi	0.903582
GCA_023625375.1_ASM2362537v1_genomic	eukaryotes	0.999857	fungi	0.996128
GCA_023625755.1_ASM2362575v1_genomic	eukaryotes	0.987252	protozoa	0.814448
GCA_023625495.1_ASM2362549v1_genomic	eukaryotes	0.999349	fungi	0.997234
GCA_023625395.1_ASM2362539v1_genomic	eukaryotes	0.999855	fungi	0.997251
GCA_023625475.1_ASM2362547v1_genomic	eukaryotes	0.999715	fungi	0.996861
GCA_023624995.1_ASM2362499v1_genomic	eukaryotes	0.999804	fungi	0.99824
GCA_023625435.1_ASM2362543v1_genomic	eukaryotes	0.999421	fungi	0.995081
GCA_023625055.1_ASM2362505v1_genomic	eukaryotes	0.999551	fungi	0.997455
GCA_023625095.1_ASM2362509v1_genomic	eukaryotes	0.999281	fungi	0.996981
GCA_023625335.1_ASM2362533v1_genomic	eukaryotes	0.998704	fungi	0.994673
GCA_023625795.1_ASM2362579v1_genomic	eukaryotes	0.999538	fungi	0.992607
GCA_023625615.1_ASM2362561v1_genomic	eukaryotes	0.999547	fungi	0.998035
GCA_023624975.1_ASM2362497v1_genomic	eukaryotes	0.999413	fungi	0.998042
GCA_023625135.1_ASM2362513v1_genomic	eukaryotes	0.99957	fungi	0.997849
GCA_023624915.1_ASM2362491v1_genomic	eukaryotes	0.999236	fungi	0.996638
GCA_023625075.1_ASM2362507v1_genomic	eukaryotes	0.999422	fungi	0.9974
GCA_023625195.1_ASM2362519v1_genomic	eukaryotes	0.999388	fungi	0.997553
GCA_023625695.1_ASM2362569v1_genomic	eukaryotes	0.986545	protozoa	0.811629
GCA_023625255.1_ASM2362525v1_genomic	eukaryotes	1	fungi	0.998049
GCA_023625035.1_ASM2362503v1_genomic	eukaryotes	0.999705	fungi	0.997642
GCA_023625295.1_ASM2362529v1_genomic	eukaryotes	0.999273	fungi	0.997238
GCA_023625455.1_ASM2362545v1_genomic	eukaryotes	0.999551	fungi	0.998354
GCA_023625635.1_ASM2362563v1_genomic	eukaryotes	0.985364	protozoa	0.815864
GCA_023625835.1_ASM2362583v1_genomic	eukaryotes	0.9988	fungi	0.989349
GCA_023625555.1_ASM2362555v1_genomic	eukaryotes	0.999357	fungi	0.996466
GCA_023625815.1_ASM2362581v1_genomic	eukaryotes	0.999149	fungi	0.990853
GCA_023625005.1_ASM2362500v1_genomic	eukaryotes	0.999804	fungi	0.998432
GCA_023625175.1_ASM2362517v1_genomic	eukaryotes	0.999414	fungi	0.996923
GCA_023625675.1_ASM2362567v1_genomic	eukaryotes	0.98678	protozoa	0.813503
GCA_023624895.1_ASM2362489v1_genomic	eukaryotes	0.999113	fungi	0.996453
GCA_023625515.1_ASM2362551v1_genomic	eukaryotes	0.999681	fungi	0.996805
GCA_023625575.1_ASM2362557v1_genomic	eukaryotes	0.999337	fungi	0.99768
GCA_023625235.1_ASM2362523v1_genomic	eukaryotes	0.99985	fungi	0.997754
GCA_023625215.1_ASM2362521v1_genomic	eukaryotes	0.999132	fungi	0.997106
GCA_023625735.1_ASM2362573v1_genomic	eukaryotes	0.98537	protozoa	0.816895
GCA_023625535.1_ASM2362553v1_genomic	eukaryotes	0.998989	fungi	0.996123
GCA_023625115.1_ASM2362511v1_genomic	eukaryotes	0.999388	fungi	0.997398
GCA_023625595.1_ASM2362559v1_genomic	eukaryotes	0.998739	fungi	0.993695
GCA_023625715.1_ASM2362571v1_genomic	eukaryotes	0.984419	protozoa	0.815864
GCA_023624935.1_ASM2362493v1_genomic	eukaryotes	0.99927	fungi	0.997957
GCA_023625775.1_ASM2362577v1_genomic	eukaryotes	0.989053	protozoa	0.823417
GCA_023625855.1_ASM2362585v1_genomic	eukaryotes	0.999112	fungi	0.99038
GCA_023625315.1_ASM2362531v1_genomic	eukaryotes	0.999713	fungi	0.996694
GCA_023625655.1_ASM2362565v1_genomic	eukaryotes	0.999398	fungi	0.997442
GCA_023625875.1_ASM2362587v1_genomic	eukaryotes	0.998162	fungi	0.993016
GCA_023625155.1_ASM2362515v1_genomic	eukaryotes	0.999134	fungi	0.996534
GCA_023625415.1_ASM2362541v1_genomic	eukaryotes	0.999553	fungi	0.997765
GCA_023624955.1_ASM2362495v1_genomic	eukaryotes	0.999804	fungi	0.99843
GCA_023625355.1_ASM2362535v1_genomic	eukaryotes	0.999857	fungi	0.996567
GCA_023625275.1_ASM2362527v1_genomic	eukaryotes	0.999694	fungi	0.998165
GCA_027579925.1_ASM2757992v1_genomic	eukaryotes	0.99972	fungi	0.886777
GCA_025769845.1_ASM2576984v1_genomic	eukaryotes	0.999864	fungi	0.998099
GCA_025769365.1_ASM2576936v1_genomic	eukaryotes	0.99929	fungi	0.996166
GCA_037040355.1_ASM3704035v1_genomic	eukaryotes	0.990521	fungi	0.979091
GCA_037040195.1_ASM3704019v1_genomic	eukaryotes	0.97561	fungi	0.762195
GCA_037039835.1_ASM3703983v1_genomic	eukaryotes	1	fungi	0.865645
GCA_037040325.1_ASM3704032v1_genomic	eukaryotes	1	fungi	0.990216
GCA_037040145.1_ASM3704014v1_genomic	eukaryotes	0.998313	fungi	0.989875
GCA_037040125.1_ASM3704012v1_genomic	eukaryotes	0.991381	fungi	0.593524
GCA_025769065.1_ASM2576906v1_genomic	eukaryotes	0.99941	fungi	0.99764
GCA_025769325.1_ASM2576932v1_genomic	eukaryotes	0.999855	fungi	0.997687
GCA_025769305.1_ASM2576930v1_genomic	eukaryotes	0.999562	fungi	0.997516
GCA_025769085.1_ASM2576908v1_genomic	eukaryotes	0.999441	fungi	0.996924
GCA_025769695.1_ASM2576969v1_genomic	eukaryotes	0.999729	fungi	0.998508
GCA_025769125.1_ASM2576912v1_genomic	eukaryotes	0.999858	fungi	0.997437
GCA_025769155.1_ASM2576915v1_genomic	eukaryotes	0.99958	fungi	0.997618
GCA_037040375.1_ASM3704037v1_genomic	eukaryotes	0.999663	fungi	0.987205
GCA_026284195.1_ASM2628419v1_genomic	eukaryotes	0.999565	fungi	0.996807
GCA_027579725.1_ASM2757972v1_genomic	eukaryotes	1	fungi	0.886313
GCA_037039665.1_ASM3703966v1_genomic	eukaryotes	0.998125	fungi	0.808399
GCA_025769035.1_ASM2576903v1_genomic	eukaryotes	0.999714	fungi	0.997144
GCA_037039815.1_ASM3703981v1_genomic	eukaryotes	0.997256	fungi	0.953579
GCA_025769455.1_ASM2576945v1_genomic	eukaryotes	0.999573	fungi	0.997865
GCA_027579685.1_ASM2757968v1_genomic	eukaryotes	0.999702	fungi	0.885451
GCA_025769415.1_ASM2576941v1_genomic	eukaryotes	0.999568	fungi	0.996832
GCA_037039655.1_ASM3703965v1_genomic	eukaryotes	1	fungi	0.871049
GCA_025769395.1_ASM2576939v1_genomic	eukaryotes	0.999708	fungi	0.997519
GCA_037040185.1_ASM3704018v1_genomic	eukaryotes	1	fungi	0.915217
GCA_025769485.1_ASM2576948v1_genomic	eukaryotes	0.999582	fungi	0.996933
GCA_025769805.1_ASM2576980v1_genomic	eukaryotes	0.999184	fungi	0.997825
GCA_025769725.1_ASM2576972v1_genomic	eukaryotes	0.999592	fungi	0.997549
GCA_025769655.1_ASM2576965v1_genomic	eukaryotes	0.999323	fungi	0.996209
GCA_025769245.1_ASM2576924v1_genomic	eukaryotes	0.999169	fungi	0.996539
GCA_037039805.1_ASM3703980v1_genomic	eukaryotes	0.999845	fungi	0.990264
GCA_025769785.1_ASM2576978v1_genomic	eukaryotes	0.999454	fungi	0.997679
GCA_025769515.1_ASM2576951v1_genomic	eukaryotes	0.999591	fungi	0.997544
GCA_025769535.1_ASM2576953v1_genomic	eukaryotes	0.999156	fungi	0.996906
GCA_025769635.1_ASM2576963v1_genomic	eukaryotes	0.999452	fungi	0.997807
GCA_025769175.1_ASM2576917v1_genomic	eukaryotes	0.999693	fungi	0.997848
GCA_037039695.1_ASM3703969v1_genomic	eukaryotes	0.972199	fungi	0.853412
GCA_025769605.1_ASM2576960v1_genomic	eukaryotes	0.999456	fungi	0.99769
GCA_027579715.1_ASM2757971v1_genomic	eukaryotes	0.999718	fungi	0.881375
GCA_025769215.1_ASM2576921v1_genomic	eukaryotes	0.999859	fungi	0.997464
GCA_037039825.1_ASM3703982v1_genomic	eukaryotes	0.989589	fungi	0.924384
GCA_025782865.1_ASM2578286v1_genomic	eukaryotes	0.99904	fungi	0.99584
GCA_025769745.1_ASM2576974v1_genomic	eukaryotes	0.999729	fungi	0.997559
GCA_037040155.1_ASM3704015v1_genomic	eukaryotes	0.960911	protozoa	0.857306
GCA_025769265.1_ASM2576926v1_genomic	eukaryotes	0.999853	fungi	0.998674
GCA_027579825.1_ASM2757982v1_genomic	eukaryotes	0.999728	fungi	0.885264
GCA_025769575.1_ASM2576957v1_genomic	eukaryotes	0.999429	fungi	0.996572
GCA_025531695.1_ASM2553169v1_genomic	eukaryotes	0.960734	fungi	0.8344
GCA_025529965.1_ASM2552996v1_genomic	eukaryotes	0.999138	fungi	0.967496
GCA_025531385.1_ASM2553138v1_genomic	eukaryotes	0.999169	fungi	0.970506
GCA_025529955.1_ASM2552995v1_genomic	eukaryotes	0.99877	fungi	0.931762
GCA_025530005.1_ASM2553000v1_genomic	eukaryotes	0.999068	fungi	0.969365
GCA_025766105.1_ASM2576610v1_genomic	eukaryotes	0.998245	fungi	0.995964
GCA_025530845.1_ASM2553084v1_genomic	eukaryotes	0.999376	fungi	0.970665
GCA_025531715.1_ASM2553171v1_genomic	eukaryotes	0.999247	fungi	0.934455
GCA_025766235.1_ASM2576623v1_genomic	eukaryotes	0.999229	fungi	0.994026
GCA_025531555.1_ASM2553155v1_genomic	eukaryotes	0.979902	fungi	0.82075
GCA_025766175.1_ASM2576617v1_genomic	eukaryotes	0.999033	fungi	0.995937
GCA_025504515.1_ASM2550451v1_genomic	eukaryotes	0.999833	fungi	0.987833
GCA_025766475.1_ASM2576647v1_genomic	eukaryotes	0.995173	fungi	0.851095
GCA_025766395.1_ASM2576639v1_genomic	eukaryotes	0.996692	fungi	0.814272
GCA_025531665.1_ASM2553166v1_genomic	eukaryotes	0.959552	fungi	0.824441
GCA_025765985.1_ASM2576598v1_genomic	eukaryotes	0.999703	fungi	0.99807
GCA_025766005.1_ASM2576600v1_genomic	eukaryotes	0.999161	fungi	0.997484
GCA_025531675.1_ASM2553167v1_genomic	eukaryotes	0.960734	fungi	0.822877
GCA_025529565.1_ASM2552956v1_genomic	eukaryotes	0.998916	fungi	0.925195
GCA_025531445.1_ASM2553144v1_genomic	eukaryotes	0.999276	fungi	0.970841
GCA_025531595.1_ASM2553159v1_genomic	eukaryotes	0.988912	fungi	0.801991
GCA_025504455.1_ASM2550445v1_genomic	eukaryotes	0.999315	fungi	0.982412
GCA_025766435.1_ASM2576643v1_genomic	eukaryotes	0.995888	fungi	0.848273
GCA_025531645.1_ASM2553164v1_genomic	eukaryotes	0.96177	fungi	0.829897
GCA_025766145.1_ASM2576614v1_genomic	eukaryotes	0.998221	fungi	0.996263
GCA_025766445.1_ASM2576644v1_genomic	eukaryotes	0.998761	fungi	0.82817
GCA_025531545.1_ASM2553154v1_genomic	eukaryotes	0.975711	fungi	0.816537
GCA_025529325.1_ASM2552932v1_genomic	eukaryotes	0.999568	fungi	0.922628
GCA_025765995.1_ASM2576599v1_genomic	eukaryotes	0.999475	fungi	0.997024
GCA_025531525.1_ASM2553152v1_genomic	eukaryotes	0.997995	fungi	0.757454
GCA_025765975.1_ASM2576597v1_genomic	eukaryotes	0.99932	fungi	0.997144
GCA_025531455.1_ASM2553145v1_genomic	eukaryotes	0.999382	fungi	0.967782
GCA_025531885.1_ASM2553188v1_genomic	eukaryotes	0.998813	fungi	0.751582
GCA_025766015.1_ASM2576601v1_genomic	eukaryotes	0.999703	fungi	0.997773
GCA_025766085.1_ASM2576608v1_genomic	eukaryotes	0.999136	fungi	0.996027
GCA_025529335.1_ASM2552933v1_genomic	eukaryotes	0.998008	fungi	0.99148
GCA_025766415.1_ASM2576641v1_genomic	eukaryotes	0.991567	fungi	0.855772
GCA_025531575.1_ASM2553157v1_genomic	eukaryotes	0.990357	fungi	0.808926
GCA_025531735.1_ASM2553173v1_genomic	eukaryotes	0.999274	fungi	0.749183
GCA_025766045.1_ASM2576604v1_genomic	eukaryotes	0.998415	fungi	0.995423
GCA_025766345.1_ASM2576634v1_genomic	eukaryotes	0.996017	fungi	0.847574
GCA_025531625.1_ASM2553162v1_genomic	eukaryotes	0.950019	fungi	0.905259
GCA_025531535.1_ASM2553153v1_genomic	eukaryotes	0.998746	fungi	0.76329
GCA_025531405.1_ASM2553140v1_genomic	eukaryotes	0.999276	fungi	0.97061
GCA_025531515.1_ASM2553151v1_genomic	eukaryotes	1	fungi	0.997779
GCA_025531435.1_ASM2553143v1_genomic	eukaryotes	1	fungi	0.998338
GCA_025504485.1_ASM2550448v1_genomic	eukaryotes	0.999667	fungi	0.988173
GCA_025529315.1_ASM2552931v1_genomic	eukaryotes	0.999132	fungi	0.926649
GCA_025529995.1_ASM2552999v1_genomic	eukaryotes	0.999276	fungi	0.969468
GCA_025531905.1_ASM2553190v1_genomic	eukaryotes	0.997019	fungi	0.989173
GCA_037042135.1_ASM3704213v1_genomic	eukaryotes	0.997979	fungi	0.993938
GCA_037042335.1_ASM3704233v1_genomic	eukaryotes	0.999285	fungi	0.815451
GCA_037042505.1_ASM3704250v1_genomic	eukaryotes	0.998988	fungi	0.998314
GCA_037042185.1_ASM3704218v1_genomic	eukaryotes	0.999676	fungi	0.993193
GCA_037041695.1_ASM3704169v1_genomic	eukaryotes	1	fungi	0.987564
GCA_037042155.1_ASM3704215v1_genomic	eukaryotes	1	fungi	0.92476
GCA_037042315.1_ASM3704231v1_genomic	eukaryotes	0.98407	fungi	0.861566
GCA_037041735.1_ASM3704173v1_genomic	eukaryotes	0.999581	fungi	0.739422
GCA_037041595.1_ASM3704159v1_genomic	eukaryotes	0.999174	fungi	0.801817
GCA_037041795.1_ASM3704179v1_genomic	eukaryotes	0.997974	fungi	0.970966
GCA_037042435.1_ASM3704243v1_genomic	eukaryotes	1	fungi	0.990556
GCA_037042395.1_ASM3704239v1_genomic	eukaryotes	0.952469	fungi	0.804321
GCA_037041775.1_ASM3704177v1_genomic	eukaryotes	0.99905	fungi	0.997626
GCA_037042455.1_ASM3704245v1_genomic	eukaryotes	0.998313	fungi	0.772778
GCA_037042235.1_ASM3704223v1_genomic	eukaryotes	0.999684	fungi	0.997476
GCA_037042525.1_ASM3704252v1_genomic	eukaryotes	0.999594	fungi	0.998579
GCA_037041655.1_ASM3704165v1_genomic	eukaryotes	0.955996	fungi	0.913926
GCA_037042035.1_ASM3704203v1_genomic	eukaryotes	1	fungi	0.941087
GCA_037041815.1_ASM3704181v1_genomic	eukaryotes	0.999182	fungi	0.99689
GCA_037041635.1_ASM3704163v1_genomic	eukaryotes	0.992785	fungi	0.591167
GCA_037041995.1_ASM3704199v1_genomic	eukaryotes	0.994005	fungi	0.93297
GCA_037041975.1_ASM3704197v1_genomic	eukaryotes	0.998792	fungi	0.937198
GCA_037042375.1_ASM3704237v1_genomic	eukaryotes	0.99954	fungi	0.993713
GCA_037041915.1_ASM3704191v1_genomic	eukaryotes	0.999157	fungi	0.749684
GCA_037042205.1_ASM3704220v1_genomic	eukaryotes	1	fungi	0.992453
GCA_037041875.1_ASM3704187v1_genomic	eukaryotes	0.998157	fungi	0.745622
GCA_037042555.1_ASM3704255v1_genomic	eukaryotes	0.998191	fungi	0.994574
GCA_037042355.1_ASM3704235v1_genomic	eukaryotes	0.985602	fungi	0.865917
GCA_037042095.1_ASM3704209v1_genomic	eukaryotes	0.999845	fungi	0.925674
GCA_037042595.1_ASM3704259v1_genomic	eukaryotes	0.998961	fungi	0.995546
GCA_037041755.1_ASM3704175v1_genomic	eukaryotes	0.998078	fungi	0.75817
GCA_037042415.1_ASM3704241v1_genomic	eukaryotes	0.960923	protozoa	0.855601
GCA_037041935.1_ASM3704193v1_genomic	eukaryotes	0.999676	fungi	0.994655
GCA_037042565.1_ASM3704256v1_genomic	eukaryotes	0.999853	fungi	0.998093
GCA_037042255.1_ASM3704225v1_genomic	eukaryotes	0.999388	fungi	0.997755
GCA_037041895.1_ASM3704189v1_genomic	eukaryotes	0.999156	fungi	0.74399
GCA_037042015.1_ASM3704201v1_genomic	eukaryotes	0.998313	fungi	0.993253
GCA_037042075.1_ASM3704207v1_genomic	eukaryotes	0.997704	fungi	0.992695
GCA_037042115.1_ASM3704211v1_genomic	eukaryotes	0.974038	fungi	0.841346
GCA_037042295.1_ASM3704229v1_genomic	eukaryotes	1	fungi	0.990992
GCA_037041715.1_ASM3704171v1_genomic	eukaryotes	1	fungi	0.997856
GCA_037042445.1_ASM3704244v1_genomic	eukaryotes	0.997203	fungi	0.830603
GCA_037042535.1_ASM3704253v1_genomic	eukaryotes	0.999281	fungi	0.995683
GCA_037042275.1_ASM3704227v1_genomic	eukaryotes	0.973346	fungi	0.925551
GCA_037041825.1_ASM3704182v1_genomic	eukaryotes	0.999463	fungi	0.994449
GCA_037042055.1_ASM3704205v1_genomic	eukaryotes	0.994945	fungi	0.987799
GCA_037041855.1_ASM3704185v1_genomic	eukaryotes	0.999566	fungi	0.765625
GCA_037041615.1_ASM3704161v1_genomic	eukaryotes	0.999287	fungi	0.997683
GCA_037041955.1_ASM3704195v1_genomic	eukaryotes	1	fungi	0.74982
GCA_037041675.1_ASM3704167v1_genomic	eukaryotes	0.997171	fungi	0.82215
GCA_023623755.1_ASM2362375v1_genomic	eukaryotes	0.999185	fungi	0.993476
GCA_023620875.1_ASM2362087v1_genomic	eukaryotes	0.999295	fungi	0.997178
GCA_023623315.1_ASM2362331v1_genomic	eukaryotes	0.976989	fungi	0.907478
GCA_023621325.1_ASM2362132v1_genomic	eukaryotes	0.999119	fungi	0.98914
GCA_023620155.1_ASM2362015v1_genomic	eukaryotes	0.998418	fungi	0.995606
GCA_023620165.1_ASM2362016v1_genomic	eukaryotes	0.998756	fungi	0.997691
GCA_037042625.1_ASM3704262v1_genomic	eukaryotes	0.999649	fungi	0.997021
GCA_023620925.1_ASM2362092v1_genomic	eukaryotes	0.99877	fungi	0.996485
GCA_037042665.1_ASM3704266v1_genomic	eukaryotes	0.999323	fungi	0.995936
GCA_023620985.1_ASM2362098v1_genomic	eukaryotes	0.998767	fungi	0.996125
GCA_023621115.1_ASM2362111v1_genomic	eukaryotes	0.999202	fungi	0.996409
GCA_023620605.1_ASM2362060v1_genomic	eukaryotes	0.999293	fungi	0.996817
GCA_023620195.1_ASM2362019v1_genomic	eukaryotes	0.998413	fungi	0.995944
GCA_023621105.1_ASM2362110v1_genomic	eukaryotes	0.99918	fungi	0.997132
GCA_023620225.1_ASM2362022v1_genomic	eukaryotes	0.9993	fungi	0.995976
GCA_037042605.1_ASM3704260v1_genomic	eukaryotes	0.999798	fungi	0.99899
GCA_023620295.1_ASM2362029v1_genomic	eukaryotes	0.998413	fungi	0.995945
GCA_023623325.1_ASM2362332v1_genomic	eukaryotes	0.999032	fungi	0.782672
GCA_023620335.1_ASM2362033v1_genomic	eukaryotes	0.998943	fungi	0.995771
GCA_023621305.1_ASM2362130v1_genomic	eukaryotes	0.999255	fungi	0.990013
GCA_023621035.1_ASM2362103v1_genomic	eukaryotes	0.999306	fungi	0.996877
GCA_023620755.1_ASM2362075v1_genomic	eukaryotes	0.99823	fungi	0.995574
GCA_023620935.1_ASM2362093v1_genomic	eukaryotes	0.99912	fungi	0.997007
GCA_023620795.1_ASM2362079v1_genomic	eukaryotes	0.998767	fungi	0.995774
GCA_023620835.1_ASM2362083v1_genomic	eukaryotes	0.998587	fungi	0.995939
GCA_023621285.1_ASM2362128v1_genomic	eukaryotes	0.999431	fungi	0.992227
GCA_023621025.1_ASM2362102v1_genomic	eukaryotes	0.998408	fungi	0.996816
GCA_023620365.1_ASM2362036v1_genomic	eukaryotes	0.999281	fungi	0.997122
GCA_023620995.1_ASM2362099v1_genomic	eukaryotes	0.998063	fungi	0.995599
GCA_023620235.1_ASM2362023v1_genomic	eukaryotes	0.998751	fungi	0.997324
GCA_023623785.1_ASM2362378v1_genomic	eukaryotes	0.999591	fungi	0.993867
GCA_023623355.1_ASM2362335v1_genomic	eukaryotes	0.999213	fungi	0.808268
GCA_023621275.1_ASM2362127v1_genomic	eukaryotes	0.999812	fungi	0.993409
GCA_023623735.1_ASM2362373v1_genomic	eukaryotes	0.999038	fungi	0.992855
GCA_023623345.1_ASM2362334v1_genomic	eukaryotes	0.997842	fungi	0.820863
GCA_023621075.1_ASM2362107v1_genomic	eukaryotes	0.998227	fungi	0.996453
GCA_023620175.1_ASM2362017v1_genomic	eukaryotes	0.998944	fungi	0.996479
GCA_023623395.1_ASM2362339v1_genomic	eukaryotes	0.993278	fungi	0.853154
GCA_023620895.1_ASM2362089v1_genomic	eukaryotes	0.998422	fungi	0.995443
GCA_023620275.1_ASM2362027v1_genomic	eukaryotes	0.99806	fungi	0.995768
GCA_023620975.1_ASM2362097v1_genomic	eukaryotes	0.998045	fungi	0.995736
GCA_023620375.1_ASM2362037v1_genomic	eukaryotes	0.998944	fungi	0.995952
GCA_023620865.1_ASM2362086v1_genomic	eukaryotes	0.998228	fungi	0.996456
GCA_023620255.1_ASM2362025v1_genomic	eukaryotes	0.998218	fungi	0.995544
GCA_023620825.1_ASM2362082v1_genomic	eukaryotes	0.998062	fungi	0.995419
GCA_023623695.1_ASM2362369v1_genomic	eukaryotes	0.996325	fungi	0.834987
GCA_023621355.1_ASM2362135v1_genomic	eukaryotes	0.99945	fungi	0.96407
GCA_023623405.1_ASM2362340v1_genomic	eukaryotes	0.997069	fungi	0.806889
GCA_023623415.1_ASM2362341v1_genomic	eukaryotes	0.995271	fungi	0.853401
GCA_023620325.1_ASM2362032v1_genomic	eukaryotes	0.998927	fungi	0.996243
GCA_023623335.1_ASM2362333v1_genomic	eukaryotes	0.998068	fungi	0.778744
GCA_023621335.1_ASM2362133v1_genomic	eukaryotes	0.999403	fungi	0.991043
GCA_023621065.1_ASM2362106v1_genomic	eukaryotes	0.999119	fungi	0.996302
GCA_025768295.1_ASM2576829v1_genomic	eukaryotes	0.999683	fungi	0.997303
GCA_025766575.1_ASM2576657v1_genomic	eukaryotes	0.992449	fungi	0.842503
GCA_025767895.1_ASM2576789v1_genomic	eukaryotes	0.999604	fungi	0.756832
GCA_025768525.1_ASM2576852v1_genomic	eukaryotes	0.997216	fungi	0.990565
GCA_025767905.1_ASM2576790v1_genomic	eukaryotes	0.998815	fungi	0.74921
GCA_025767575.1_ASM2576757v1_genomic	eukaryotes	0.997584	fungi	0.780105
GCA_025767685.1_ASM2576768v1_genomic	eukaryotes	0.995185	fungi	0.857037
GCA_025768615.1_ASM2576861v1_genomic	eukaryotes	0.995873	fungi	0.987619
GCA_025767715.1_ASM2576771v1_genomic	eukaryotes	0.999603	fungi	0.747423
GCA_025768175.1_ASM2576817v1_genomic	eukaryotes	1	fungi	0.997384
GCA_025768115.1_ASM2576811v1_genomic	eukaryotes	0.998997	fungi	0.993311
GCA_025768045.1_ASM2576804v1_genomic	eukaryotes	0.998412	fungi	0.753474
GCA_025767915.1_ASM2576791v1_genomic	eukaryotes	0.999204	fungi	0.748608
GCA_025766535.1_ASM2576653v1_genomic	eukaryotes	0.993093	fungi	0.831698
GCA_025768735.1_ASM2576873v1_genomic	eukaryotes	0.996367	fungi	0.990205
GCA_025768445.1_ASM2576844v1_genomic	eukaryotes	0.995989	fungi	0.987967
GCA_025767885.1_ASM2576788v1_genomic	eukaryotes	0.999209	fungi	0.743671
GCA_025768385.1_ASM2576838v1_genomic	eukaryotes	0.995069	fungi	0.987912
GCA_025768325.1_ASM2576832v1_genomic	eukaryotes	0.995582	fungi	0.987691
GCA_025768975.1_ASM2576897v1_genomic	eukaryotes	1	fungi	0.99711
GCA_025768665.1_ASM2576866v1_genomic	eukaryotes	0.996168	fungi	0.987706
GCA_025768645.1_ASM2576864v1_genomic	eukaryotes	0.996181	fungi	0.988701
GCA_025766515.1_ASM2576651v1_genomic	eukaryotes	0.992529	fungi	0.843116
GCA_025768905.1_ASM2576890v1_genomic	eukaryotes	0.999848	fungi	0.998172
GCA_025768855.1_ASM2576885v1_genomic	eukaryotes	0.999517	fungi	0.996778
GCA_025768355.1_ASM2576835v1_genomic	eukaryotes	0.9959	fungi	0.989751
GCA_025768405.1_ASM2576840v1_genomic	eukaryotes	0.99701	fungi	0.98977
GCA_025769005.1_ASM2576900v1_genomic	eukaryotes	0.99972	fungi	0.996634
GCA_025767625.1_ASM2576762v1_genomic	eukaryotes	0.995957	fungi	0.824329
GCA_025768265.1_ASM2576826v1_genomic	eukaryotes	0.999362	fungi	0.996492
GCA_025768145.1_ASM2576814v1_genomic	eukaryotes	0.999834	fungi	0.997838
GCA_025768005.1_ASM2576800v1_genomic	eukaryotes	0.998411	fungi	0.739873
GCA_025768555.1_ASM2576855v1_genomic	eukaryotes	0.997451	fungi	0.993151
GCA_025766595.1_ASM2576659v1_genomic	eukaryotes	0.998262	fungi	0.824935
GCA_025768585.1_ASM2576858v1_genomic	eukaryotes	0.99544	fungi	0.987579
GCA_025768885.1_ASM2576888v1_genomic	eukaryotes	0.999715	fungi	0.997011
GCA_025767605.1_ASM2576760v1_genomic	eukaryotes	0.995803	fungi	0.847768
GCA_025768765.1_ASM2576876v1_genomic	eukaryotes	0.994518	fungi	0.986961
GCA_025768815.1_ASM2576881v1_genomic	eukaryotes	0.999407	fungi	0.997036
GCA_025767555.1_ASM2576755v1_genomic	eukaryotes	0.993096	fungi	0.836483
GCA_025768795.1_ASM2576879v1_genomic	eukaryotes	0.997164	fungi	0.988815
GCA_025767665.1_ASM2576766v1_genomic	eukaryotes	0.996372	fungi	0.849057
GCA_025767775.1_ASM2576777v1_genomic	eukaryotes	0.999205	fungi	0.749105
GCA_025768705.1_ASM2576870v1_genomic	eukaryotes	0.99544	fungi	0.987419
GCA_025767995.1_ASM2576799v1_genomic	eukaryotes	0.999604	fungi	0.737926
GCA_025768925.1_ASM2576892v1_genomic	eukaryotes	0.999541	fungi	0.997857
GCA_025767985.1_ASM2576798v1_genomic	eukaryotes	0.999207	fungi	0.738992
GCA_025768475.1_ASM2576847v1_genomic	eukaryotes	0.999832	fungi	0.996974
GCA_025768105.1_ASM2576810v1_genomic	eukaryotes	0.999288	fungi	0.99626
GCA_025767825.1_ASM2576782v1_genomic	eukaryotes	1	fungi	0.742676
GCA_023620085.1_ASM2362008v1_genomic	eukaryotes	0.998271	fungi	0.995851
GCA_023619845.1_ASM2361984v1_genomic	eukaryotes	0.99653	fungi	0.991781
GCA_023618865.1_ASM2361886v1_genomic	eukaryotes	1	fungi	0.998361
GCA_023619455.1_ASM2361945v1_genomic	eukaryotes	0.999561	fungi	0.997656
GCA_023618935.1_ASM2361893v1_genomic	eukaryotes	0.999852	fungi	0.997635
GCA_023619995.1_ASM2361999v1_genomic	eukaryotes	0.998294	fungi	0.994357
GCA_023619485.1_ASM2361948v1_genomic	eukaryotes	0.999564	fungi	0.997965
GCA_023618385.1_ASM2361838v1_genomic	eukaryotes	0.998839	fungi	0.994776
GCA_023620035.1_ASM2362003v1_genomic	eukaryotes	0.999629	fungi	0.997958
GCA_023618995.1_ASM2361899v1_genomic	eukaryotes	0.99985	fungi	0.997452
GCA_023619755.1_ASM2361975v1_genomic	eukaryotes	0.999701	fungi	0.997906
GCA_023618955.1_ASM2361895v1_genomic	eukaryotes	0.999552	fungi	0.997611
GCA_023618915.1_ASM2361891v1_genomic	eukaryotes	0.99944	fungi	0.996918
GCA_023619575.1_ASM2361957v1_genomic	eukaryotes	0.99956	fungi	0.997945
GCA_023619495.1_ASM2361949v1_genomic	eukaryotes	0.999703	fungi	0.997625
GCA_040807085.1_ASM4080708v1_genomic	eukaryotes	1	fungi	1
GCA_023619545.1_ASM2361954v1_genomic	eukaryotes	0.999699	fungi	0.997589
GCA_023619325.1_ASM2361932v1_genomic	eukaryotes	0.999853	fungi	0.998531
GCA_023619725.1_ASM2361972v1_genomic	eukaryotes	0.999411	fungi	0.997349
GCA_023620105.1_ASM2362010v1_genomic	eukaryotes	0.998587	fungi	0.996466
GCA_023619705.1_ASM2361970v1_genomic	eukaryotes	0.99941	fungi	0.996757
GCA_023620045.1_ASM2362004v1_genomic	eukaryotes	0.998068	fungi	0.99561
GCA_023619405.1_ASM2361940v1_genomic	eukaryotes	1	fungi	0.997728
GCA_023619295.1_ASM2361929v1_genomic	eukaryotes	0.999697	fungi	0.998031
GCA_023619605.1_ASM2361960v1_genomic	eukaryotes	0.999703	fungi	0.997774
GCA_023618355.1_ASM2361835v1_genomic	eukaryotes	0.999718	fungi	0.997318
GCA_040807105.1_ASM4080710v1_genomic	eukaryotes	1	fungi	0.987322
GCA_023619375.1_ASM2361937v1_genomic	eukaryotes	0.999561	fungi	0.998243
GCA_023619415.1_ASM2361941v1_genomic	eukaryotes	0.998984	fungi	0.997678
GCA_023619365.1_ASM2361936v1_genomic	eukaryotes	0.999539	fungi	0.997848
GCA_023618375.1_ASM2361837v1_genomic	eukaryotes	0.99943	fungi	0.997151
GCA_023619515.1_ASM2361951v1_genomic	eukaryotes	0.999698	fungi	0.997888
GCA_023619345.1_ASM2361934v1_genomic	eukaryotes	0.999715	fungi	0.997721
GCA_023618365.1_ASM2361836v1_genomic	eukaryotes	0.999716	fungi	0.99716
GCA_023619795.1_ASM2361979v1_genomic	eukaryotes	0.999423	fungi	0.995958
GCA_037042735.1_ASM3704273v1_genomic	eukaryotes	1	fungi	0.992206
GCA_023618985.1_ASM2361898v1_genomic	eukaryotes	0.999849	fungi	0.997736
GCA_023619645.1_ASM2361964v1_genomic	eukaryotes	0.999849	fungi	0.998189
GCA_023619655.1_ASM2361965v1_genomic	eukaryotes	0.999553	fungi	0.997767
GCA_023619815.1_ASM2361981v1_genomic	eukaryotes	0.997288	fungi	0.991683
GCA_023619615.1_ASM2361961v1_genomic	eukaryotes	0.999547	fungi	0.99819
GCA_023619785.1_ASM2361978v1_genomic	eukaryotes	0.999598	fungi	0.996582
GCA_023619855.1_ASM2361985v1_genomic	eukaryotes	0.997609	fungi	0.993889
GCA_023619555.1_ASM2361955v1_genomic	eukaryotes	0.999564	fungi	0.998545
GCA_023619285.1_ASM2361928v1_genomic	eukaryotes	0.999265	fungi	0.997941
GCA_023618895.1_ASM2361889v1_genomic	eukaryotes	0.999711	fungi	0.997251
GCA_023619445.1_ASM2361944v1_genomic	eukaryotes	0.999266	fungi	0.997504
GCA_023619735.1_ASM2361973v1_genomic	eukaryotes	0.99955	fungi	0.997448
GCA_023618435.1_ASM2361843v1_genomic	eukaryotes	0.999595	fungi	0.997432
GCA_023618715.1_ASM2361871v1_genomic	eukaryotes	0.999304	fungi	0.997218
GCA_023620055.1_ASM2362005v1_genomic	eukaryotes	0.998962	fungi	0.996886
GCA_023619275.1_ASM2361927v1_genomic	eukaryotes	0.999716	fungi	0.99744
GCA_023620135.1_ASM2362013v1_genomic	eukaryotes	0.998599	fungi	0.996498
GCA_023626615.1_ASM2362661v1_genomic	eukaryotes	0.999146	fungi	0.992656
GCA_023626655.1_ASM2362665v1_genomic	eukaryotes	1	fungi	0.997832
GCA_023626735.1_ASM2362673v1_genomic	eukaryotes	0.99968	fungi	0.996161
GCA_023626335.1_ASM2362633v1_genomic	eukaryotes	0.999266	fungi	0.993691
GCA_023626315.1_ASM2362631v1_genomic	eukaryotes	0.99912	fungi	0.99267
GCA_023625895.1_ASM2362589v1_genomic	eukaryotes	0.999485	fungi	0.99365
GCA_023626395.1_ASM2362639v1_genomic	eukaryotes	0.9997	fungi	0.99745
GCA_023625995.1_ASM2362599v1_genomic	eukaryotes	0.998107	fungi	0.990392
GCA_023626255.1_ASM2362625v1_genomic	eukaryotes	0.99941	fungi	0.992038
GCA_023626275.1_ASM2362627v1_genomic	eukaryotes	0.999118	fungi	0.993974
GCA_023626595.1_ASM2362659v1_genomic	eukaryotes	0.999832	fungi	0.997978
GCA_023626775.1_ASM2362677v1_genomic	eukaryotes	0.999685	fungi	0.996846
GCA_023626095.1_ASM2362609v1_genomic	eukaryotes	0.998993	fungi	0.991657
GCA_023625975.1_ASM2362597v1_genomic	eukaryotes	0.999823	fungi	0.996999
GCA_023626855.1_ASM2362685v1_genomic	eukaryotes	0.999531	fungi	0.996717
GCA_023626875.1_ASM2362687v1_genomic	eukaryotes	0.999526	fungi	0.996999
GCA_023626755.1_ASM2362675v1_genomic	eukaryotes	0.999494	fungi	0.9973
GCA_023626715.1_ASM2362671v1_genomic	eukaryotes	0.9995	fungi	0.996997
GCA_023626675.1_ASM2362667v1_genomic	eukaryotes	0.999666	fungi	0.996664
GCA_023625915.1_ASM2362591v1_genomic	eukaryotes	0.999657	fungi	0.994177
GCA_023626495.1_ASM2362649v1_genomic	eukaryotes	0.999141	fungi	0.993646
GCA_023626215.1_ASM2362621v1_genomic	eukaryotes	0.999381	fungi	0.995052
GCA_023626575.1_ASM2362657v1_genomic	eukaryotes	0.998915	fungi	0.997422
GCA_023626015.1_ASM2362601v1_genomic	eukaryotes	0.999816	fungi	0.997235
GCA_023626135.1_ASM2362613v1_genomic	eukaryotes	0.999079	fungi	0.984188
GCA_023625935.1_ASM2362593v1_genomic	eukaryotes	0.999263	fungi	0.988646
GCA_023626415.1_ASM2362641v1_genomic	eukaryotes	0.999422	fungi	0.997111
GCA_023626815.1_ASM2362681v1_genomic	eukaryotes	0.999341	fungi	0.997365
GCA_023626155.1_ASM2362615v1_genomic	eukaryotes	0.998964	fungi	0.991709
GCA_023626795.1_ASM2362679v1_genomic	eukaryotes	0.999492	fungi	0.997797
GCA_023626435.1_ASM2362643v1_genomic	eukaryotes	0.99963	fungi	0.997412
GCA_023626695.1_ASM2362669v1_genomic	eukaryotes	0.999662	fungi	0.997974
GCA_023626475.1_ASM2362647v1_genomic	eukaryotes	0.997889	fungi	0.995616
GCA_023626035.1_ASM2362603v1_genomic	eukaryotes	0.999107	fungi	0.996071
GCA_023626455.1_ASM2362645v1_genomic	eukaryotes	0.997424	fungi	0.995009
GCA_023626535.1_ASM2362653v1_genomic	eukaryotes	0.999492	fungi	0.993566
GCA_023626515.1_ASM2362651v1_genomic	eukaryotes	0.999171	fungi	0.993203
GCA_023626175.1_ASM2362617v1_genomic	eukaryotes	0.999563	fungi	0.994905
GCA_023626555.1_ASM2362655v1_genomic	eukaryotes	0.998499	fungi	0.992164
GCA_023626235.1_ASM2362623v1_genomic	eukaryotes	0.998971	fungi	0.992946
GCA_023626195.1_ASM2362619v1_genomic	eukaryotes	0.999852	fungi	0.993211
GCA_023626375.1_ASM2362637v1_genomic	eukaryotes	0.999281	fungi	0.995545
GCA_023625955.1_ASM2362595v1_genomic	eukaryotes	0.999484	fungi	0.993975
GCA_023626115.1_ASM2362611v1_genomic	eukaryotes	0.998671	fungi	0.991143
GCA_023626835.1_ASM2362683v1_genomic	eukaryotes	0.999667	fungi	0.997339
GCA_023626055.1_ASM2362605v1_genomic	eukaryotes	0.998951	fungi	0.99206
GCA_023626635.1_ASM2362663v1_genomic	eukaryotes	0.999667	fungi	0.996337
GCA_023626295.1_ASM2362629v1_genomic	eukaryotes	0.999118	fungi	0.992353
GCA_023626355.1_ASM2362635v1_genomic	eukaryotes	0.998777	fungi	0.993885
GCA_023626075.1_ASM2362607v1_genomic	eukaryotes	0.998844	fungi	0.991905
GCA_023628055.1_ASM2362805v1_genomic	eukaryotes	0.994764	fungi	0.990907
GCA_023627955.1_ASM2362795v1_genomic	eukaryotes	0.999212	fungi	0.920447
GCA_023628455.1_ASM2362845v1_genomic	eukaryotes	0.99905	fungi	0.995565
GCA_023627975.1_ASM2362797v1_genomic	eukaryotes	0.999003	fungi	0.878335
GCA_023628195.1_ASM2362819v1_genomic	eukaryotes	0.993741	fungi	0.872109
GCA_023628695.1_ASM2362869v1_genomic	eukaryotes	0.999065	fungi	0.996027
GCA_023628135.1_ASM2362813v1_genomic	eukaryotes	0.998684	fungi	0.869899
GCA_023628255.1_ASM2362825v1_genomic	eukaryotes	1	fungi	0.987312
GCA_023628295.1_ASM2362829v1_genomic	eukaryotes	0.999531	fungi	0.98733
GCA_023628395.1_ASM2362839v1_genomic	eukaryotes	0.999495	fungi	0.992822
GCA_023627915.1_ASM2362791v1_genomic	eukaryotes	0.998865	fungi	0.981381
GCA_023628115.1_ASM2362811v1_genomic	eukaryotes	0.99655	fungi	0.992834
GCA_023628425.1_ASM2362842v1_genomic	eukaryotes	0.999566	fungi	0.990599
GCA_023628075.1_ASM2362807v1_genomic	eukaryotes	0.992565	fungi	0.988317
GCA_023628175.1_ASM2362817v1_genomic	eukaryotes	0.996585	fungi	0.991707
GCA_023628715.1_ASM2362871v1_genomic	eukaryotes	0.998479	fungi	0.995327
GCA_023628235.1_ASM2362823v1_genomic	eukaryotes	0.998354	fungi	0.993416
GCA_023628535.1_ASM2362853v1_genomic	eukaryotes	0.99563	fungi	0.987051
GCA_023628315.1_ASM2362831v1_genomic	eukaryotes	0.9992	fungi	0.992296
GCA_023628755.1_ASM2362875v1_genomic	eukaryotes	0.999289	fungi	0.99218
GCA_023628495.1_ASM2362849v1_genomic	eukaryotes	0.999247	fungi	0.978012
GCA_023627895.1_ASM2362789v1_genomic	eukaryotes	0.998184	fungi	0.853614
GCA_023628595.1_ASM2362859v1_genomic	eukaryotes	0.997245	fungi	0.988333
GCA_023628275.1_ASM2362827v1_genomic	eukaryotes	0.994798	fungi	0.86788
GCA_023628675.1_ASM2362867v1_genomic	eukaryotes	0.996124	fungi	0.985627
GCA_023628015.1_ASM2362801v1_genomic	eukaryotes	0.999052	fungi	0.917997
GCA_023628795.1_ASM2362879v1_genomic	eukaryotes	0.999607	fungi	0.994107
GCA_023628555.1_ASM2362855v1_genomic	eukaryotes	0.999254	fungi	0.980609
GCA_023627935.1_ASM2362793v1_genomic	eukaryotes	0.999369	fungi	0.922119
GCA_023628215.1_ASM2362821v1_genomic	eukaryotes	0.999766	fungi	0.985935
GCA_023628635.1_ASM2362863v1_genomic	eukaryotes	0.996723	fungi	0.988039
GCA_023628475.1_ASM2362847v1_genomic	eukaryotes	0.999046	fungi	0.991571
GCA_023628375.1_ASM2362837v1_genomic	eukaryotes	0.998466	fungi	0.995525
GCA_023628155.1_ASM2362815v1_genomic	eukaryotes	0.99486	fungi	0.991434
GCA_023627985.1_ASM2362798v1_genomic	eukaryotes	0.999251	fungi	0.878493
GCA_023628835.1_ASM2362883v1_genomic	eukaryotes	0.997906	fungi	0.988184
GCA_023628095.1_ASM2362809v1_genomic	eukaryotes	0.998072	fungi	0.944099
GCA_023628815.1_ASM2362881v1_genomic	eukaryotes	0.999365	fungi	0.992219
GCA_023628655.1_ASM2362865v1_genomic	eukaryotes	0.999505	fungi	0.993235
GCA_023628335.1_ASM2362833v1_genomic	eukaryotes	0.999293	fungi	0.992224
GCA_023628415.1_ASM2362841v1_genomic	eukaryotes	0.999139	fungi	0.993852
GCA_023628775.1_ASM2362877v1_genomic	eukaryotes	0.998533	fungi	0.962848
GCA_023628355.1_ASM2362835v1_genomic	eukaryotes	1	fungi	0.986632
GCA_023628035.1_ASM2362803v1_genomic	eukaryotes	0.999355	fungi	0.966867
GCA_023628575.1_ASM2362857v1_genomic	eukaryotes	0.995624	fungi	0.988724
GCA_023628875.1_ASM2362887v1_genomic	eukaryotes	0.996411	fungi	0.986842
GCA_023628615.1_ASM2362861v1_genomic	eukaryotes	0.996923	fungi	0.987854
GCA_023628515.1_ASM2362851v1_genomic	eukaryotes	0.996112	fungi	0.986716
GCA_023628735.1_ASM2362873v1_genomic	eukaryotes	0.999526	fungi	0.992423
GCA_023628855.1_ASM2362885v1_genomic	eukaryotes	0.9997	fungi	0.99371
GCA_023627115.1_ASM2362711v1_genomic	eukaryotes	0.999832	fungi	0.997982
GCA_023627335.1_ASM2362733v1_genomic	eukaryotes	1	fungi	0.997856
GCA_023626975.1_ASM2362697v1_genomic	eukaryotes	0.999343	fungi	0.997043
GCA_023627295.1_ASM2362729v1_genomic	eukaryotes	0.999661	fungi	0.996776
GCA_023627755.1_ASM2362775v1_genomic	eukaryotes	0.996646	fungi	0.742558
GCA_023626895.1_ASM2362689v1_genomic	eukaryotes	0.999318	fungi	0.997443
GCA_023627595.1_ASM2362759v1_genomic	eukaryotes	0.998852	fungi	0.996268
GCA_023627765.1_ASM2362776v1_genomic	eukaryotes	0.999693	fungi	0.97573
GCA_023627435.1_ASM2362743v1_genomic	eukaryotes	0.999596	fungi	0.997373
GCA_023627175.1_ASM2362717v1_genomic	eukaryotes	0.999683	fungi	0.996032
GCA_023626995.1_ASM2362699v1_genomic	eukaryotes	0.999506	fungi	0.996545
GCA_023627055.1_ASM2362705v1_genomic	eukaryotes	0.999517	fungi	0.997262
GCA_023627855.1_ASM2362785v1_genomic	eukaryotes	0.998117	fungi	0.852731
GCA_023627795.1_ASM2362779v1_genomic	eukaryotes	0.998709	fungi	0.935859
GCA_023627035.1_ASM2362703v1_genomic	eukaryotes	0.999833	fungi	0.997001
GCA_023627455.1_ASM2362745v1_genomic	eukaryotes	0.9996	fungi	0.997399
GCA_023627155.1_ASM2362715v1_genomic	eukaryotes	0.99965	fungi	0.996505
GCA_023627015.1_ASM2362701v1_genomic	eukaryotes	0.999835	fungi	0.997694
GCA_023627235.1_ASM2362723v1_genomic	eukaryotes	0.999501	fungi	0.99734
GCA_023627475.1_ASM2362747v1_genomic	eukaryotes	0.99961	fungi	0.997074
GCA_023627355.1_ASM2362735v1_genomic	eukaryotes	0.999834	fungi	0.997514
GCA_023627135.1_ASM2362713v1_genomic	eukaryotes	0.999834	fungi	0.997338
GCA_023627695.1_ASM2362769v1_genomic	eukaryotes	0.999404	fungi	0.997764
GCA_023627495.1_ASM2362749v1_genomic	eukaryotes	0.999411	fungi	0.996075
GCA_023627715.1_ASM2362771v1_genomic	eukaryotes	0.999649	fungi	0.982103
GCA_023627395.1_ASM2362739v1_genomic	eukaryotes	0.999797	fungi	0.996959
GCA_023627655.1_ASM2362765v1_genomic	eukaryotes	0.999395	fungi	0.998185
GCA_023627255.1_ASM2362725v1_genomic	eukaryotes	0.999686	fungi	0.996394
GCA_023627835.1_ASM2362783v1_genomic	eukaryotes	0.998326	fungi	0.749372
GCA_023627375.1_ASM2362737v1_genomic	eukaryotes	0.999436	fungi	0.996806
GCA_023627675.1_ASM2362767v1_genomic	eukaryotes	0.999401	fungi	0.997752
GCA_023627075.1_ASM2362707v1_genomic	eukaryotes	0.99921	fungi	0.995734
GCA_023627405.1_ASM2362740v1_genomic	eukaryotes	0.999749	fungi	0.998745
GCA_023627555.1_ASM2362755v1_genomic	eukaryotes	0.999001	fungi	0.996002
GCA_023627725.1_ASM2362772v1_genomic	eukaryotes	1	fungi	0.957749
GCA_023626915.1_ASM2362691v1_genomic	eukaryotes	0.999528	fungi	0.996064
GCA_023627095.1_ASM2362709v1_genomic	eukaryotes	0.999679	fungi	0.997429
GCA_023627815.1_ASM2362781v1_genomic	eukaryotes	0.997483	fungi	0.748742
GCA_023627875.1_ASM2362787v1_genomic	eukaryotes	0.998631	fungi	0.983569
GCA_023627535.1_ASM2362753v1_genomic	eukaryotes	0.998886	fungi	0.993735
GCA_023627515.1_ASM2362751v1_genomic	eukaryotes	0.9994	fungi	0.996599
GCA_023627315.1_ASM2362731v1_genomic	eukaryotes	0.999825	fungi	0.996842
GCA_023627615.1_ASM2362761v1_genomic	eukaryotes	0.999394	fungi	0.99803
GCA_023627195.1_ASM2362719v1_genomic	eukaryotes	0.999488	fungi	0.997099
GCA_023627635.1_ASM2362763v1_genomic	eukaryotes	0.999257	fungi	0.997325
GCA_023626935.1_ASM2362693v1_genomic	eukaryotes	0.999362	fungi	0.996011
GCA_023627215.1_ASM2362721v1_genomic	eukaryotes	0.998806	fungi	0.996247
GCA_023627275.1_ASM2362727v1_genomic	eukaryotes	0.999664	fungi	0.996805
GCA_023627575.1_ASM2362757v1_genomic	eukaryotes	0.99902	fungi	0.994402
GCA_023626955.1_ASM2362695v1_genomic	eukaryotes	0.999362	fungi	0.997129
GCA_037041455.1_ASM3704145v1_genomic	eukaryotes	0.991741	fungi	0.594219
GCA_037040825.1_ASM3704082v1_genomic	eukaryotes	0.999852	fungi	0.994359
GCA_037040985.1_ASM3704098v1_genomic	eukaryotes	0.999246	fungi	0.995024
GCA_037040905.1_ASM3704090v1_genomic	eukaryotes	0.99864	fungi	0.743032
GCA_037041025.1_ASM3704102v1_genomic	eukaryotes	0.995206	protozoa	0.772771
GCA_037040695.1_ASM3704069v1_genomic	eukaryotes	0.995259	fungi	0.875428
GCA_037041535.1_ASM3704153v1_genomic	eukaryotes	0.999719	fungi	0.965469
GCA_037040595.1_ASM3704059v1_genomic	eukaryotes	0.998148	fungi	0.807407
GCA_037041285.1_ASM3704128v1_genomic	eukaryotes	0.999523	fungi	0.872853
GCA_037040955.1_ASM3704095v1_genomic	eukaryotes	0.992354	fungi	0.927908
GCA_037041435.1_ASM3704143v1_genomic	eukaryotes	0.981481	fungi	0.920758
GCA_037041475.1_ASM3704147v1_genomic	eukaryotes	0.992438	fungi	0.593951
GCA_037040535.1_ASM3704053v1_genomic	eukaryotes	0.999354	fungi	0.987559
GCA_037040875.1_ASM3704087v1_genomic	eukaryotes	0.994018	fungi	0.968096
GCA_037041205.1_ASM3704120v1_genomic	eukaryotes	1	fungi	0.728814
GCA_037041575.1_ASM3704157v1_genomic	eukaryotes	0.99956	fungi	0.991636
GCA_037040925.1_ASM3704092v1_genomic	eukaryotes	0.999049	fungi	0.995247
GCA_037041495.1_ASM3704149v1_genomic	eukaryotes	1	fungi	0.928216
GCA_037040775.1_ASM3704077v1_genomic	eukaryotes	0.999322	fungi	0.873532
GCA_037040795.1_ASM3704079v1_genomic	eukaryotes	0.999118	fungi	0.991912
GCA_037041175.1_ASM3704117v1_genomic	eukaryotes	0.998527	fungi	0.813328
GCA_037040735.1_ASM3704073v1_genomic	eukaryotes	0.988676	protozoa	0.822747
GCA_037041105.1_ASM3704110v1_genomic	eukaryotes	0.998549	fungi	0.934481
GCA_037040945.1_ASM3704094v1_genomic	eukaryotes	0.977361	fungi	0.566745
GCA_037041355.1_ASM3704135v1_genomic	eukaryotes	0.994633	fungi	0.86711
GCA_037041065.1_ASM3704106v1_genomic	eukaryotes	0.995966	fungi	0.825736
GCA_037041375.1_ASM3704137v1_genomic	eukaryotes	0.999622	fungi	0.997166
GCA_037041055.1_ASM3704105v1_genomic	eukaryotes	0.877735	fungi	0.592879
GCA_037041415.1_ASM3704141v1_genomic	eukaryotes	0.969892	fungi	0.825269
GCA_037041395.1_ASM3704139v1_genomic	eukaryotes	1	fungi	0.997304
GCA_037040845.1_ASM3704084v1_genomic	eukaryotes	0.981361	fungi	0.95622
GCA_037040545.1_ASM3704054v1_genomic	eukaryotes	1	fungi	0.874321
GCA_037040865.1_ASM3704086v1_genomic	eukaryotes	0.992859	fungi	0.59208
GCA_037040655.1_ASM3704065v1_genomic	eukaryotes	0.998614	fungi	0.866051
GCA_037041515.1_ASM3704151v1_genomic	eukaryotes	0.999194	fungi	0.750537
GCA_037041165.1_ASM3704116v1_genomic	eukaryotes	0.989907	fungi	0.818331
GCA_037041255.1_ASM3704125v1_genomic	eukaryotes	0.998899	fungi	0.757887
GCA_037041225.1_ASM3704122v1_genomic	eukaryotes	0.989583	fungi	0.739583
GCA_037040515.1_ASM3704051v1_genomic	eukaryotes	1	fungi	0.827392
GCA_037040415.1_ASM3704041v1_genomic	eukaryotes	0.997053	fungi	0.821218
GCA_037040715.1_ASM3704071v1_genomic	eukaryotes	0.999584	fungi	0.75052
GCA_037041095.1_ASM3704109v1_genomic	eukaryotes	0.999595	fungi	0.734413
GCA_037041125.1_ASM3704112v1_genomic	eukaryotes	0.999192	fungi	0.741714
GCA_037040395.1_ASM3704039v1_genomic	eukaryotes	1	fungi	0.993727
GCA_037041555.1_ASM3704155v1_genomic	eukaryotes	0.998867	fungi	0.992349
GCA_037041015.1_ASM3704101v1_genomic	eukaryotes	0.998602	fungi	0.870426
GCA_037040455.1_ASM3704045v1_genomic	eukaryotes	1	fungi	0.993734
GCA_037040975.1_ASM3704097v1_genomic	eukaryotes	0.997972	fungi	0.798174
GCA_037041245.1_ASM3704124v1_genomic	eukaryotes	0.998848	fungi	0.869094
GCA_037040755.1_ASM3704075v1_genomic	eukaryotes	0.999722	fungi	0.996941
GCA_023624835.1_ASM2362483v1_genomic	eukaryotes	0.999319	fungi	0.993017
GCA_023624775.1_ASM2362477v1_genomic	eukaryotes	0.999838	fungi	0.996929
GCA_023624315.1_ASM2362431v1_genomic	eukaryotes	0.999825	fungi	0.997207
GCA_023623825.1_ASM2362382v1_genomic	eukaryotes	0.998779	fungi	0.994768
GCA_023624695.1_ASM2362469v1_genomic	eukaryotes	0.999512	fungi	0.997395
GCA_023624735.1_ASM2362473v1_genomic	eukaryotes	0.999837	fungi	0.997881
GCA_023623995.1_ASM2362399v1_genomic	eukaryotes	0.999648	fungi	0.995067
GCA_023624135.1_ASM2362413v1_genomic	eukaryotes	0.999495	fungi	0.997476
GCA_023624055.1_ASM2362405v1_genomic	eukaryotes	0.999218	fungi	0.997811
GCA_023624755.1_ASM2362475v1_genomic	eukaryotes	0.999522	fungi	0.997131
GCA_023624335.1_ASM2362433v1_genomic	eukaryotes	0.999831	fungi	0.997466
GCA_023624535.1_ASM2362453v1_genomic	eukaryotes	0.999809	fungi	0.997142
GCA_023624475.1_ASM2362447v1_genomic	eukaryotes	0.999357	fungi	0.996141
GCA_023624595.1_ASM2362459v1_genomic	eukaryotes	0.995076	fungi	0.987929
GCA_023623875.1_ASM2362387v1_genomic	eukaryotes	0.999277	fungi	0.994937
GCA_023624435.1_ASM2362443v1_genomic	eukaryotes	0.999835	fungi	0.998185
GCA_040807125.1_ASM4080712v1_genomic	eukaryotes	1	fungi	0.929978
GCA_023624715.1_ASM2362471v1_genomic	eukaryotes	0.999674	fungi	0.996418
GCA_023624085.1_ASM2362408v1_genomic	eukaryotes	0.999216	fungi	0.997492
GCA_023624095.1_ASM2362409v1_genomic	eukaryotes	0.999531	fungi	0.998279
GCA_023624455.1_ASM2362445v1_genomic	eukaryotes	0.999841	fungi	0.997608
GCA_023623985.1_ASM2362398v1_genomic	eukaryotes	0.99879	fungi	0.994124
GCA_023624375.1_ASM2362437v1_genomic	eukaryotes	0.999667	fungi	0.997339
GCA_023624045.1_ASM2362404v1_genomic	eukaryotes	0.998579	fungi	0.997316
GCA_023624395.1_ASM2362439v1_genomic	eukaryotes	0.999834	fungi	0.997176
GCA_023623855.1_ASM2362385v1_genomic	eukaryotes	0.999459	fungi	0.99459
GCA_023624855.1_ASM2362485v1_genomic	eukaryotes	0.998827	fungi	0.992797
GCA_023624355.1_ASM2362435v1_genomic	eukaryotes	0.999495	fungi	0.997141
GCA_023624025.1_ASM2362402v1_genomic	eukaryotes	0.999284	fungi	0.995346
GCA_023624615.1_ASM2362461v1_genomic	eukaryotes	0.999434	fungi	0.996982
GCA_023623795.1_ASM2362379v1_genomic	eukaryotes	0.998954	fungi	0.992676
GCA_023624675.1_ASM2362467v1_genomic	eukaryotes	0.999029	fungi	0.997411
GCA_023624555.1_ASM2362455v1_genomic	eukaryotes	0.998984	fungi	0.996748
GCA_023623975.1_ASM2362397v1_genomic	eukaryotes	0.999284	fungi	0.995168
GCA_023624235.1_ASM2362423v1_genomic	eukaryotes	0.999666	fungi	0.996992
GCA_023624785.1_ASM2362478v1_genomic	eukaryotes	0.999518	fungi	0.997753
GCA_040807145.1_ASM4080714v1_genomic	eukaryotes	1	fungi	0.97619
GCA_023624415.1_ASM2362441v1_genomic	eukaryotes	0.999155	fungi	0.996111
GCA_023624875.1_ASM2362487v1_genomic	eukaryotes	0.99911	fungi	0.995772
GCA_023624165.1_ASM2362416v1_genomic	eukaryotes	0.999666	fungi	0.99666
GCA_023624145.1_ASM2362414v1_genomic	eukaryotes	0.999051	fungi	0.997944
GCA_023624255.1_ASM2362425v1_genomic	eukaryotes	0.999663	fungi	0.997644
GCA_023623845.1_ASM2362384v1_genomic	eukaryotes	0.999469	fungi	0.996285
GCA_023624575.1_ASM2362457v1_genomic	eukaryotes	0.999052	fungi	0.995073
GCA_023624185.1_ASM2362418v1_genomic	eukaryotes	0.999667	fungi	0.997672
GCA_023624295.1_ASM2362429v1_genomic	eukaryotes	0.999071	fungi	0.996285
GCA_023624815.1_ASM2362481v1_genomic	eukaryotes	0.999674	fungi	0.998371
GCA_023624655.1_ASM2362465v1_genomic	eukaryotes	0.997404	fungi	0.989462
GCA_023624275.1_ASM2362427v1_genomic	eukaryotes	0.999663	fungi	0.9973
GCA_023624515.1_ASM2362451v1_genomic	eukaryotes	0.999248	fungi	0.996802
GCA_023624495.1_ASM2362449v1_genomic	eukaryotes	0.999808	fungi	0.997499
GCA_023624635.1_ASM2362463v1_genomic	eukaryotes	0.999438	fungi	0.996439
GCA_023630035.1_ASM2363003v1_genomic	eukaryotes	0.999181	fungi	0.930399
GCA_023630325.1_ASM2363032v1_genomic	eukaryotes	0.999435	fungi	0.919947
GCA_023630555.1_ASM2363055v1_genomic	eukaryotes	0.999667	fungi	0.987009
GCA_025503755.1_ASM2550375v1_genomic	eukaryotes	0.997911	fungi	0.754701
GCA_023630475.1_ASM2363047v1_genomic	eukaryotes	0.999572	fungi	0.989093
GCA_025502755.1_ASM2550275v1_genomic	eukaryotes	0.992931	fungi	0.874779
GCA_023630315.1_ASM2363031v1_genomic	eukaryotes	0.999436	fungi	0.922224
GCA_025503195.1_ASM2550319v1_genomic	eukaryotes	0.947642	fungi	0.868023
GCA_023630295.1_ASM2363029v1_genomic	eukaryotes	0.996268	fungi	0.990383
GCA_023630435.1_ASM2363043v1_genomic	eukaryotes	0.999561	fungi	0.987711
GCA_025502745.1_ASM2550274v1_genomic	eukaryotes	0.995126	fungi	0.877886
GCA_023629975.1_ASM2362997v1_genomic	eukaryotes	0.998858	fungi	0.964384
GCA_025503005.1_ASM2550300v1_genomic	eukaryotes	0.999534	fungi	0.99674
GCA_023630305.1_ASM2363030v1_genomic	eukaryotes	0.99981	fungi	0.923587
GCA_025502925.1_ASM2550292v1_genomic	eukaryotes	0.994979	fungi	0.867437
GCA_025503375.1_ASM2550337v1_genomic	eukaryotes	0.959006	fungi	0.897078
GCA_025502915.1_ASM2550291v1_genomic	eukaryotes	0.992628	fungi	0.870615
GCA_023630095.1_ASM2363009v1_genomic	eukaryotes	0.999247	fungi	0.821926
GCA_025504415.1_ASM2550441v1_genomic	eukaryotes	0.999316	fungi	0.981984
GCA_025503465.1_ASM2550346v1_genomic	eukaryotes	0.946768	fungi	0.902408
GCA_023630075.1_ASM2363007v1_genomic	eukaryotes	0.99816	fungi	0.932515
GCA_025502865.1_ASM2550286v1_genomic	eukaryotes	0.994411	fungi	0.877287
GCA_023629955.1_ASM2362995v1_genomic	eukaryotes	1	fungi	0.823668
GCA_025503585.1_ASM2550358v1_genomic	eukaryotes	0.97561	fungi	0.908656
GCA_023629995.1_ASM2362999v1_genomic	eukaryotes	0.999087	fungi	0.966667
GCA_023630135.1_ASM2363013v1_genomic	eukaryotes	0.998566	fungi	0.928323
GCA_025504395.1_ASM2550439v1_genomic	eukaryotes	0.998861	fungi	0.984969
GCA_023630465.1_ASM2363046v1_genomic	eukaryotes	0.999791	fungi	0.98723
GCA_025504325.1_ASM2550432v1_genomic	eukaryotes	0.998189	fungi	0.985058
GCA_025502615.1_ASM2550261v1_genomic	eukaryotes	0.997379	fungi	0.85408
GCA_025502945.1_ASM2550294v1_genomic	eukaryotes	0.993631	fungi	0.870064
GCA_025502605.1_ASM2550260v1_genomic	eukaryotes	0.997916	fungi	0.856179
GCA_025502685.1_ASM2550268v1_genomic	eukaryotes	0.99905	fungi	0.922066
GCA_023630015.1_ASM2363001v1_genomic	eukaryotes	0.998772	fungi	0.933893
GCA_023630055.1_ASM2363005v1_genomic	eukaryotes	0.998933	fungi	0.795134
GCA_025503635.1_ASM2550363v1_genomic	eukaryotes	0.991071	fungi	0.952381
GCA_025502885.1_ASM2550288v1_genomic	eukaryotes	0.994179	fungi	0.875221
GCA_023629935.1_ASM2362993v1_genomic	eukaryotes	0.999702	fungi	0.917982
GCA_025502645.1_ASM2550264v1_genomic	eukaryotes	0.999205	fungi	0.917608
GCA_025503895.1_ASM2550389v1_genomic	eukaryotes	1	fungi	0.868269
GCA_023630335.1_ASM2363033v1_genomic	eukaryotes	0.996846	fungi	0.993377
GCA_023629915.1_ASM2362991v1_genomic	eukaryotes	1	fungi	0.944322
GCA_025504335.1_ASM2550433v1_genomic	eukaryotes	0.998166	fungi	0.980747
GCA_025503555.1_ASM2550355v1_genomic	eukaryotes	0.977064	fungi	0.850292
GCA_023630115.1_ASM2363011v1_genomic	eukaryotes	0.9985	fungi	0.826875
GCA_024586305.1_ASM2458630v1_genomic	eukaryotes	0.939341	fungi	0.831209
GCA_025504425.1_ASM2550442v1_genomic	eukaryotes	0.999087	fungi	0.985156
GCA_025502725.1_ASM2550272v1_genomic	eukaryotes	0.992626	fungi	0.869311
GCA_025503015.1_ASM2550301v1_genomic	eukaryotes	0.996427	fungi	0.986357
GCA_025503055.1_ASM2550305v1_genomic	eukaryotes	0.999131	fungi	0.997046
