# Supplementary material for: Probing the eukaryotic microbes of ruminants with a deep-learning classifier and comprehensive protein databases
Source: HighWire-hosted journal article supplement (doi:10.1101/gr.279825.124), 2024-12-27
Supplement: Supplemental_Table_S2.xlsx [file Supplemental_Table_S2.xlsx]

## Sheet: Supplementary Table 1
Supplementary Table S2. Metadata of the 1,093 rumen metagenomes used
id	project	name	species	origin	geography	beef_or_dairy
SRR12529067	PRJNA657455	Goat_Abomasum-6	Capra_hircus	Abomasum	China	na
SRR12529068	PRJNA657455	Goat_Abomasum-5	Capra_hircus	Abomasum	China	na
SRR12529069	PRJNA657455	Goat_Abomasum-4	Capra_hircus	Abomasum	China	na
SRR12529070	PRJNA657455	Goat_Abomasum-3	Capra_hircus	Abomasum	China	na
SRR12529071	PRJNA657455	Goat_Abomasum-2	Capra_hircus	Abomasum	China	na
SRR12529072	PRJNA657455	Goat_Abomasum-1	Capra_hircus	Abomasum	China	na
SRR12529084	PRJNA657455	Dairy_cattle_Abomasum-6	Bos_taurus	Abomasum	China	dairy
SRR12529095	PRJNA657455	Dairy_cattle_Abomasum-5	Bos_taurus	Abomasum	China	dairy
SRR12529148	PRJNA657455	Yak_Abomasum-5	Bos_grunniens	Abomasum	China	na
SRR12529149	PRJNA657455	Yak_Abomasum-4	Bos_grunniens	Abomasum	China	na
SRR12529150	PRJNA657455	Yak_Abomasum-3	Bos_grunniens	Abomasum	China	na
SRR12529151	PRJNA657455	Yak_Abomasum-2	Bos_grunniens	Abomasum	China	na
SRR12529152	PRJNA657455	Yak_Abomasum-1	Bos_grunniens	Abomasum	China	na
SRR12529176	PRJNA657455	Dairy_cattle_Abomasum-4	Bos_taurus	Abomasum	China	dairy
SRR12529204	PRJNA657455	Water_deer_Abomasum-5	Hydropotes_inermis	Abomasum	China	na
SRR12529205	PRJNA657455	Water_deer_Abomasum-4	Hydropotes_inermis	Abomasum	China	na
SRR12529206	PRJNA657455	Water_deer_Abomasum-3	Hydropotes_inermis	Abomasum	China	na
SRR12529207	PRJNA657455	Water_deer_Abomasum-2	Hydropotes_inermis	Abomasum	China	na
SRR12529208	PRJNA657455	Water_deer_Abomasum-1	Hydropotes_inermis	Abomasum	China	na
SRR12529259	PRJNA657455	Water_buffalos_Abomasum-5	Bubalus_bubalis	Abomasum	China	na
SRR12529260	PRJNA657455	Water_buffalos_Abomasum-4	Bubalus_bubalis	Abomasum	China	na
SRR12529261	PRJNA657455	Water_buffalos_Abomasum-3	Bubalus_bubalis	Abomasum	China	na
SRR12529262	PRJNA657455	Water_buffalos_Abomasum-2	Bubalus_bubalis	Abomasum	China	na
SRR12529263	PRJNA657455	Water_buffalos_Abomasum-1	Bubalus_bubalis	Abomasum	China	na
SRR12529287	PRJNA657455	Dairy_cattle_Abomasum-3	Bos_taurus	Abomasum	China	dairy
SRR12529315	PRJNA657455	Sheep_Abomasum-5	Ovis_aries	Abomasum	China	na
SRR12529316	PRJNA657455	Sheep_Abomasum-4	Ovis_aries	Abomasum	China	na
SRR12529317	PRJNA657455	Sheep_Abomasum-3	Ovis_aries	Abomasum	China	na
SRR12529318	PRJNA657455	Sheep_Abomasum-2	Ovis_aries	Abomasum	China	na
SRR12529319	PRJNA657455	Sheep_Abomasum-1	Ovis_aries	Abomasum	China	na
SRR12529370	PRJNA657455	Roe_deer_Abomasum-5	Capreolus_capreolus	Abomasum	China	na
SRR12529371	PRJNA657455	Roe_deer_Abomasum-4	Capreolus_capreolus	Abomasum	China	na
SRR12529372	PRJNA657455	Roe_deer_Abomasum-3	Capreolus_capreolus	Abomasum	China	na
SRR12529373	PRJNA657455	Roe_deer_Abomasum-2	Capreolus_capreolus	Abomasum	China	na
SRR12529374	PRJNA657455	Roe_deer_Abomasum-1	Capreolus_capreolus	Abomasum	China	na
SRR12529398	PRJNA657455	Dairy_cattle_Abomasum-2	Bos_taurus	Abomasum	China	dairy
SRR12529399	PRJNA657455	Dairy_cattle_Abomasum-1	Bos_taurus	Abomasum	China	dairy
SRR12529040	PRJNA657455	Dairy_cattle_Cecum-4	Bos_taurus	Cecum	China	dairy
SRR12529051	PRJNA657455	Dairy_cattle_Cecum-3	Bos_taurus	Cecum	China	dairy
SRR12529060	PRJNA657455	Goat_Cecum-6	Capra_hircus	Cecum	China	na
SRR12529061	PRJNA657455	Goat_Cecum-5	Capra_hircus	Cecum	China	na
SRR12529062	PRJNA657455	Dairy_cattle_Cecum-2	Bos_taurus	Cecum	China	dairy
SRR12529063	PRJNA657455	Goat_Cecum-4	Capra_hircus	Cecum	China	na
SRR12529064	PRJNA657455	Goat_Cecum-3	Capra_hircus	Cecum	China	na
SRR12529065	PRJNA657455	Goat_Cecum-2	Capra_hircus	Cecum	China	na
SRR12529066	PRJNA657455	Goat_Cecum-1	Capra_hircus	Cecum	China	na
SRR12529073	PRJNA657455	Dairy_cattle_Cecum-1	Bos_taurus	Cecum	China	dairy
SRR12529143	PRJNA657455	Yak_Cecum-5	Bos_grunniens	Cecum	China	na
SRR12529144	PRJNA657455	Yak_Cecum-4	Bos_grunniens	Cecum	China	na
SRR12529145	PRJNA657455	Yak_Cecum-3	Bos_grunniens	Cecum	China	na
SRR12529146	PRJNA657455	Yak_Cecum-2	Bos_grunniens	Cecum	China	na
SRR12529147	PRJNA657455	Yak_Cecum-1	Bos_grunniens	Cecum	China	na
SRR12529199	PRJNA657455	Water_deer_Cecum-5	Hydropotes_inermis	Cecum	China	na
SRR12529200	PRJNA657455	Water_deer_Cecum-4	Hydropotes_inermis	Cecum	China	na
SRR12529201	PRJNA657455	Water_deer_Cecum-3	Hydropotes_inermis	Cecum	China	na
SRR12529202	PRJNA657455	Water_deer_Cecum-2	Hydropotes_inermis	Cecum	China	na
SRR12529203	PRJNA657455	Water_deer_Cecum-1	Hydropotes_inermis	Cecum	China	na
SRR12529254	PRJNA657455	Water_buffalos_Cecum-5	Bubalus_bubalis	Cecum	China	na
SRR12529255	PRJNA657455	Water_buffalos_Cecum-4	Bubalus_bubalis	Cecum	China	na
SRR12529256	PRJNA657455	Water_buffalos_Cecum-3	Bubalus_bubalis	Cecum	China	na
SRR12529257	PRJNA657455	Water_buffalos_Cecum-2	Bubalus_bubalis	Cecum	China	na
SRR12529258	PRJNA657455	Water_buffalos_Cecum-1	Bubalus_bubalis	Cecum	China	na
SRR12529310	PRJNA657455	Sheep_Cecum-5	Ovis_aries	Cecum	China	na
SRR12529311	PRJNA657455	Sheep_Cecum-4	Ovis_aries	Cecum	China	na
SRR12529312	PRJNA657455	Sheep_Cecum-3	Ovis_aries	Cecum	China	na
SRR12529313	PRJNA657455	Sheep_Cecum-2	Ovis_aries	Cecum	China	na
SRR12529314	PRJNA657455	Sheep_Cecum-1	Ovis_aries	Cecum	China	na
SRR12529365	PRJNA657455	Roe_deer_Cecum-5	Capreolus_capreolus	Cecum	China	na
SRR12529366	PRJNA657455	Roe_deer_Cecum-4	Capreolus_capreolus	Cecum	China	na
SRR12529367	PRJNA657455	Roe_deer_Cecum-3	Capreolus_capreolus	Cecum	China	na
SRR12529368	PRJNA657455	Roe_deer_Cecum-2	Capreolus_capreolus	Cecum	China	na
SRR12529369	PRJNA657455	Roe_deer_Cecum-1	Capreolus_capreolus	Cecum	China	na
SRR12529386	PRJNA657455	Dairy_cattle_Cecum-6	Bos_taurus	Cecum	China	dairy
SRR12529397	PRJNA657455	Dairy_cattle_Cecum-5	Bos_taurus	Cecum	China	dairy
SRR12529054	PRJNA657455	Goat_Colon-6	Capra_hircus	Colon	China	na
SRR12529055	PRJNA657455	Goat_Colon-5	Capra_hircus	Colon	China	na
SRR12529056	PRJNA657455	Goat_Colon-4	Capra_hircus	Colon	China	na
SRR12529057	PRJNA657455	Goat_Colon-3	Capra_hircus	Colon	China	na
SRR12529058	PRJNA657455	Goat_Colon-2	Capra_hircus	Colon	China	na
SRR12529059	PRJNA657455	Goat_Colon-1	Capra_hircus	Colon	China	na
SRR12529137	PRJNA657455	Yak_Colon-5	Bos_grunniens	Colon	China	na
SRR12529138	PRJNA657455	Yak_Colon-4	Bos_grunniens	Colon	China	na
SRR12529139	PRJNA657455	Yak_Colon-3	Bos_grunniens	Colon	China	na
SRR12529140	PRJNA657455	Yak_Colon-2	Bos_grunniens	Colon	China	na
SRR12529141	PRJNA657455	Yak_Colon-1	Bos_grunniens	Colon	China	na
SRR12529193	PRJNA657455	Water_deer_Colon-5	Hydropotes_inermis	Colon	China	na
SRR12529194	PRJNA657455	Water_deer_Colon-4	Hydropotes_inermis	Colon	China	na
SRR12529195	PRJNA657455	Water_deer_Colon-3	Hydropotes_inermis	Colon	China	na
SRR12529196	PRJNA657455	Water_deer_Colon-2	Hydropotes_inermis	Colon	China	na
SRR12529197	PRJNA657455	Water_deer_Colon-1	Hydropotes_inermis	Colon	China	na
SRR12529248	PRJNA657455	Water_buffalos_Colon-5	Bubalus_bubalis	Colon	China	na
SRR12529249	PRJNA657455	Water_buffalos_Colon-4	Bubalus_bubalis	Colon	China	na
SRR12529250	PRJNA657455	Water_buffalos_Colon-3	Bubalus_bubalis	Colon	China	na
SRR12529251	PRJNA657455	Water_buffalos_Colon-2	Bubalus_bubalis	Colon	China	na
SRR12529252	PRJNA657455	Water_buffalos_Colon-1	Bubalus_bubalis	Colon	China	na
SRR12529304	PRJNA657455	Sheep_Colon-5	Ovis_aries	Colon	China	na
SRR12529305	PRJNA657455	Sheep_Colon-4	Ovis_aries	Colon	China	na
SRR12529306	PRJNA657455	Sheep_Colon-3	Ovis_aries	Colon	China	na
SRR12529307	PRJNA657455	Sheep_Colon-2	Ovis_aries	Colon	China	na
SRR12529308	PRJNA657455	Sheep_Colon-1	Ovis_aries	Colon	China	na
SRR12529320	PRJNA657455	Dairy_cattle_Colon-6	Bos_taurus	Colon	China	dairy
SRR12529331	PRJNA657455	Dairy_cattle_Colon-5	Bos_taurus	Colon	China	dairy
SRR12529342	PRJNA657455	Dairy_cattle_Colon-4	Bos_taurus	Colon	China	dairy
SRR12529353	PRJNA657455	Dairy_cattle_Colon-3	Bos_taurus	Colon	China	dairy
SRR12529359	PRJNA657455	Roe_deer_Colon-5	Capreolus_capreolus	Colon	China	na
SRR12529360	PRJNA657455	Roe_deer_Colon-4	Capreolus_capreolus	Colon	China	na
SRR12529361	PRJNA657455	Roe_deer_Colon-3	Capreolus_capreolus	Colon	China	na
SRR12529362	PRJNA657455	Roe_deer_Colon-2	Capreolus_capreolus	Colon	China	na
SRR12529363	PRJNA657455	Roe_deer_Colon-1	Capreolus_capreolus	Colon	China	na
SRR12529364	PRJNA657455	Dairy_cattle_Colon-2	Bos_taurus	Colon	China	dairy
SRR12529375	PRJNA657455	Dairy_cattle_Colon-1	Bos_taurus	Colon	China	dairy
SRR12529030	PRJNA657455	Goat_Omasum-4	Capra_hircus	Omasum	China	na
SRR12529031	PRJNA657455	Goat_Omasum-3	Capra_hircus	Omasum	China	na
SRR12529032	PRJNA657455	Goat_Omasum-2	Capra_hircus	Omasum	China	na
SRR12529033	PRJNA657455	Goat_Omasum-1	Capra_hircus	Omasum	China	na
SRR12529093	PRJNA657455	Dairy_cattle_Omasum-6	Bos_taurus	Omasum	China	dairy
SRR12529094	PRJNA657455	Dairy_cattle_Omasum-5	Bos_taurus	Omasum	China	dairy
SRR12529096	PRJNA657455	Dairy_cattle_Omasum-4	Bos_taurus	Omasum	China	dairy
SRR12529097	PRJNA657455	Dairy_cattle_Omasum-3	Bos_taurus	Omasum	China	dairy
SRR12529098	PRJNA657455	Dairy_cattle_Omasum-2	Bos_taurus	Omasum	China	dairy
SRR12529109	PRJNA657455	Dairy_cattle_Omasum-1	Bos_taurus	Omasum	China	dairy
SRR12529115	PRJNA657455	Yak_Omasum-5	Bos_grunniens	Omasum	China	na
SRR12529116	PRJNA657455	Yak_Omasum-4	Bos_grunniens	Omasum	China	na
SRR12529117	PRJNA657455	Yak_Omasum-3	Bos_grunniens	Omasum	China	na
SRR12529118	PRJNA657455	Yak_Omasum-2	Bos_grunniens	Omasum	China	na
SRR12529119	PRJNA657455	Yak_Omasum-1	Bos_grunniens	Omasum	China	na
SRR12529170	PRJNA657455	Water_deer_Omasum-5	Hydropotes_inermis	Omasum	China	na
SRR12529171	PRJNA657455	Water_deer_Omasum-4	Hydropotes_inermis	Omasum	China	na
SRR12529172	PRJNA657455	Water_deer_Omasum-3	Hydropotes_inermis	Omasum	China	na
SRR12529173	PRJNA657455	Water_deer_Omasum-2	Hydropotes_inermis	Omasum	China	na
SRR12529174	PRJNA657455	Water_deer_Omasum-1	Hydropotes_inermis	Omasum	China	na
SRR12529226	PRJNA657455	Water_buffalos_Omasum-5	Bubalus_bubalis	Omasum	China	na
SRR12529227	PRJNA657455	Water_buffalos_Omasum-4	Bubalus_bubalis	Omasum	China	na
SRR12529228	PRJNA657455	Water_buffalos_Omasum-3	Bubalus_bubalis	Omasum	China	na
SRR12529229	PRJNA657455	Water_buffalos_Omasum-2	Bubalus_bubalis	Omasum	China	na
SRR12529230	PRJNA657455	Water_buffalos_Omasum-1	Bubalus_bubalis	Omasum	China	na
SRR12529281	PRJNA657455	Sheep_Omasum-5	Ovis_aries	Omasum	China	na
SRR12529282	PRJNA657455	Sheep_Omasum-4	Ovis_aries	Omasum	China	na
SRR12529283	PRJNA657455	Sheep_Omasum-3	Ovis_aries	Omasum	China	na
SRR12529284	PRJNA657455	Sheep_Omasum-2	Ovis_aries	Omasum	China	na
SRR12529285	PRJNA657455	Sheep_Omasum-1	Ovis_aries	Omasum	China	na
SRR12529337	PRJNA657455	Roe_deer_Omasum-5	Capreolus_capreolus	Omasum	China	na
SRR12529338	PRJNA657455	Roe_deer_Omasum-4	Capreolus_capreolus	Omasum	China	na
SRR12529339	PRJNA657455	Roe_deer_Omasum-3	Capreolus_capreolus	Omasum	China	na
SRR12529340	PRJNA657455	Roe_deer_Omasum-2	Capreolus_capreolus	Omasum	China	na
SRR12529341	PRJNA657455	Roe_deer_Omasum-1	Capreolus_capreolus	Omasum	China	na
SRR12529395	PRJNA657455	Goat_Omasum-6	Capra_hircus	Omasum	China	na
SRR12529396	PRJNA657455	Goat_Omasum-5	Capra_hircus	Omasum	China	na
SRR12529087	PRJNA657455	Dairy_cattle_Rectum-6	Bos_taurus	Rectum	China	dairy
SRR12529088	PRJNA657455	Dairy_cattle_Rectum-5	Bos_taurus	Rectum	China	dairy
SRR12529089	PRJNA657455	Dairy_cattle_Rectum-4	Bos_taurus	Rectum	China	dairy
SRR12529090	PRJNA657455	Dairy_cattle_Rectum-3	Bos_taurus	Rectum	China	dairy
SRR12529091	PRJNA657455	Dairy_cattle_Rectum-2	Bos_taurus	Rectum	China	dairy
SRR12529092	PRJNA657455	Dairy_cattle_Rectum-1	Bos_taurus	Rectum	China	dairy
SRR12529110	PRJNA657455	Yak_Rectum-5	Bos_grunniens	Rectum	China	na
SRR12529111	PRJNA657455	Yak_Rectum-4	Bos_grunniens	Rectum	China	na
SRR12529112	PRJNA657455	Yak_Rectum-3	Bos_grunniens	Rectum	China	na
SRR12529113	PRJNA657455	Yak_Rectum-2	Bos_grunniens	Rectum	China	na
SRR12529114	PRJNA657455	Yak_Rectum-1	Bos_grunniens	Rectum	China	na
SRR12529165	PRJNA657455	Water_deer_Rectum-5	Hydropotes_inermis	Rectum	China	na
SRR12529166	PRJNA657455	Water_deer_Rectum-4	Hydropotes_inermis	Rectum	China	na
SRR12529167	PRJNA657455	Water_deer_Rectum-3	Hydropotes_inermis	Rectum	China	na
SRR12529168	PRJNA657455	Water_deer_Rectum-2	Hydropotes_inermis	Rectum	China	na
SRR12529169	PRJNA657455	Water_deer_Rectum-1	Hydropotes_inermis	Rectum	China	na
SRR12529221	PRJNA657455	Water_buffalos_Rectum-5	Bubalus_bubalis	Rectum	China	na
SRR12529222	PRJNA657455	Water_buffalos_Rectum-4	Bubalus_bubalis	Rectum	China	na
SRR12529223	PRJNA657455	Water_buffalos_Rectum-3	Bubalus_bubalis	Rectum	China	na
SRR12529224	PRJNA657455	Water_buffalos_Rectum-2	Bubalus_bubalis	Rectum	China	na
SRR12529225	PRJNA657455	Water_buffalos_Rectum-1	Bubalus_bubalis	Rectum	China	na
SRR12529276	PRJNA657455	Sheep_Rectum-5	Ovis_aries	Rectum	China	na
SRR12529277	PRJNA657455	Sheep_Rectum-4	Ovis_aries	Rectum	China	na
SRR12529278	PRJNA657455	Sheep_Rectum-3	Ovis_aries	Rectum	China	na
SRR12529279	PRJNA657455	Sheep_Rectum-2	Ovis_aries	Rectum	China	na
SRR12529280	PRJNA657455	Sheep_Rectum-1	Ovis_aries	Rectum	China	na
SRR12529332	PRJNA657455	Roe_deer_Rectum-5	Capreolus_capreolus	Rectum	China	na
SRR12529333	PRJNA657455	Roe_deer_Rectum-4	Capreolus_capreolus	Rectum	China	na
SRR12529334	PRJNA657455	Roe_deer_Rectum-3	Capreolus_capreolus	Rectum	China	na
SRR12529335	PRJNA657455	Roe_deer_Rectum-2	Capreolus_capreolus	Rectum	China	na
SRR12529336	PRJNA657455	Roe_deer_Rectum-1	Capreolus_capreolus	Rectum	China	na
SRR12529389	PRJNA657455	Goat_Rectum-6	Capra_hircus	Rectum	China	na
SRR12529390	PRJNA657455	Goat_Rectum-5	Capra_hircus	Rectum	China	na
SRR12529391	PRJNA657455	Goat_Rectum-4	Capra_hircus	Rectum	China	na
SRR12529392	PRJNA657455	Goat_Rectum-3	Capra_hircus	Rectum	China	na
SRR12529393	PRJNA657455	Goat_Rectum-2	Capra_hircus	Rectum	China	na
SRR12529394	PRJNA657455	Goat_Rectum-1	Capra_hircus	Rectum	China	na
SRR12529080	PRJNA657455	Dairy_cattle_Reticulum-6	Bos_taurus	Reticulum	China	dairy
SRR12529081	PRJNA657455	Dairy_cattle_Reticulum-5	Bos_taurus	Reticulum	China	dairy
SRR12529082	PRJNA657455	Dairy_cattle_Reticulum-4	Bos_taurus	Reticulum	China	dairy
SRR12529083	PRJNA657455	Dairy_cattle_Reticulum-3	Bos_taurus	Reticulum	China	dairy
SRR12529085	PRJNA657455	Dairy_cattle_Reticulum-2	Bos_taurus	Reticulum	China	dairy
SRR12529086	PRJNA657455	Dairy_cattle_Reticulum-1	Bos_taurus	Reticulum	China	dairy
SRR12529104	PRJNA657455	Yak_Reticulum-5	Bos_grunniens	Reticulum	China	na
SRR12529105	PRJNA657455	Yak_Reticulum-4	Bos_grunniens	Reticulum	China	na
SRR12529106	PRJNA657455	Yak_Reticulum-3	Bos_grunniens	Reticulum	China	na
SRR12529107	PRJNA657455	Yak_Reticulum-2	Bos_grunniens	Reticulum	China	na
SRR12529108	PRJNA657455	Yak_Reticulum-1	Bos_grunniens	Reticulum	China	na
SRR12529159	PRJNA657455	Water_deer_Reticulum-5	Hydropotes_inermis	Reticulum	China	na
SRR12529160	PRJNA657455	Water_deer_Reticulum-4	Hydropotes_inermis	Reticulum	China	na
SRR12529161	PRJNA657455	Water_deer_Reticulum-3	Hydropotes_inermis	Reticulum	China	na
SRR12529162	PRJNA657455	Water_deer_Reticulum-2	Hydropotes_inermis	Reticulum	China	na
SRR12529163	PRJNA657455	Water_deer_Reticulum-1	Hydropotes_inermis	Reticulum	China	na
SRR12529215	PRJNA657455	Water_buffalos_Reticulum-5	Bubalus_bubalis	Reticulum	China	na
SRR12529216	PRJNA657455	Water_buffalos_Reticulum-4	Bubalus_bubalis	Reticulum	China	na
SRR12529217	PRJNA657455	Water_buffalos_Reticulum-3	Bubalus_bubalis	Reticulum	China	na
SRR12529218	PRJNA657455	Water_buffalos_Reticulum-2	Bubalus_bubalis	Reticulum	China	na
SRR12529219	PRJNA657455	Water_buffalos_Reticulum-1	Bubalus_bubalis	Reticulum	China	na
SRR12529270	PRJNA657455	Sheep_Reticulum-5	Ovis_aries	Reticulum	China	na
SRR12529271	PRJNA657455	Sheep_Reticulum-4	Ovis_aries	Reticulum	China	na
SRR12529272	PRJNA657455	Sheep_Reticulum-3	Ovis_aries	Reticulum	China	na
SRR12529273	PRJNA657455	Sheep_Reticulum-2	Ovis_aries	Reticulum	China	na
SRR12529274	PRJNA657455	Sheep_Reticulum-1	Ovis_aries	Reticulum	China	na
SRR12529326	PRJNA657455	Roe_deer_Reticulum-5	Capreolus_capreolus	Reticulum	China	na
SRR12529327	PRJNA657455	Roe_deer_Reticulum-4	Capreolus_capreolus	Reticulum	China	na
SRR12529328	PRJNA657455	Roe_deer_Reticulum-3	Capreolus_capreolus	Reticulum	China	na
SRR12529329	PRJNA657455	Roe_deer_Reticulum-2	Capreolus_capreolus	Reticulum	China	na
SRR12529330	PRJNA657455	Roe_deer_Reticulum-1	Capreolus_capreolus	Reticulum	China	na
SRR12529382	PRJNA657455	Goat_Reticulum-6	Capra_hircus	Reticulum	China	na
SRR12529383	PRJNA657455	Goat_Reticulum-5	Capra_hircus	Reticulum	China	na
SRR12529384	PRJNA657455	Goat_Reticulum-4	Capra_hircus	Reticulum	China	na
SRR12529385	PRJNA657455	Goat_Reticulum-3	Capra_hircus	Reticulum	China	na
SRR12529387	PRJNA657455	Goat_Reticulum-2	Capra_hircus	Reticulum	China	na
SRR12529388	PRJNA657455	Goat_Reticulum-1	Capra_hircus	Reticulum	China	na
SRR12529074	PRJNA657455	Dairy_cattle_Rumen-6	Bos_taurus	Rumen	China	dairy
SRR12529075	PRJNA657455	Dairy_cattle_Rumen-5	Bos_taurus	Rumen	China	dairy
SRR12529076	PRJNA657455	Dairy_cattle_Rumen-4	Bos_taurus	Rumen	China	dairy
SRR12529077	PRJNA657455	Dairy_cattle_Rumen-3	Bos_taurus	Rumen	China	dairy
SRR12529078	PRJNA657455	Dairy_cattle_Rumen-2	Bos_taurus	Rumen	China	dairy
SRR12529079	PRJNA657455	Dairy_cattle_Rumen-1	Bos_taurus	Rumen	China	dairy
SRR12529099	PRJNA657455	Yak_Rumen-5	Bos_grunniens	Rumen	China	na
SRR12529100	PRJNA657455	Yak_Rumen-4	Bos_grunniens	Rumen	China	na
SRR12529101	PRJNA657455	Yak_Rumen-3	Bos_grunniens	Rumen	China	na
SRR12529102	PRJNA657455	Yak_Rumen-2	Bos_grunniens	Rumen	China	na
SRR12529103	PRJNA657455	Yak_Rumen-1	Bos_grunniens	Rumen	China	na
SRR12529154	PRJNA657455	Water_deer_Rumen-5	Hydropotes_inermis	Rumen	China	na
SRR12529155	PRJNA657455	Water_deer_Rumen-4	Hydropotes_inermis	Rumen	China	na
SRR12529156	PRJNA657455	Water_deer_Rumen-3	Hydropotes_inermis	Rumen	China	na
SRR12529157	PRJNA657455	Water_deer_Rumen-2	Hydropotes_inermis	Rumen	China	na
SRR12529158	PRJNA657455	Water_deer_Rumen-1	Hydropotes_inermis	Rumen	China	na
SRR12529210	PRJNA657455	Water_buffalos_Rumen-5	Bubalus_bubalis	Rumen	China	na
SRR12529211	PRJNA657455	Water_buffalos_Rumen-4	Bubalus_bubalis	Rumen	China	na
SRR12529212	PRJNA657455	Water_buffalos_Rumen-3	Bubalus_bubalis	Rumen	China	na
SRR12529213	PRJNA657455	Water_buffalos_Rumen-2	Bubalus_bubalis	Rumen	China	na
SRR12529214	PRJNA657455	Water_buffalos_Rumen-1	Bubalus_bubalis	Rumen	China	na
SRR12529265	PRJNA657455	Sheep_Rumen-5	Ovis_aries	Rumen	China	na
SRR12529266	PRJNA657455	Sheep_Rumen-4	Ovis_aries	Rumen	China	na
SRR12529267	PRJNA657455	Sheep_Rumen-3	Ovis_aries	Rumen	China	na
SRR12529268	PRJNA657455	Sheep_Rumen-2	Ovis_aries	Rumen	China	na
SRR12529269	PRJNA657455	Sheep_Rumen-1	Ovis_aries	Rumen	China	na
SRR12529321	PRJNA657455	Roe_deer_Rumen-5	Capreolus_capreolus	Rumen	China	na
SRR12529322	PRJNA657455	Roe_deer_Rumen-4	Capreolus_capreolus	Rumen	China	na
SRR12529323	PRJNA657455	Roe_deer_Rumen-3	Capreolus_capreolus	Rumen	China	na
SRR12529324	PRJNA657455	Roe_deer_Rumen-2	Capreolus_capreolus	Rumen	China	na
SRR12529325	PRJNA657455	Roe_deer_Rumen-1	Capreolus_capreolus	Rumen	China	na
SRR12529376	PRJNA657455	Goat_Rumen-6	Capra_hircus	Rumen	China	na
SRR12529377	PRJNA657455	Goat_Rumen-5	Capra_hircus	Rumen	China	na
SRR12529378	PRJNA657455	Goat_Rumen-4	Capra_hircus	Rumen	China	na
SRR12529379	PRJNA657455	Goat_Rumen-3	Capra_hircus	Rumen	China	na
SRR12529380	PRJNA657455	Goat_Rumen-2	Capra_hircus	Rumen	China	na
SRR12529381	PRJNA657455	Goat_Rumen-1	Capra_hircus	Rumen	China	na
ERR2027889	PRJEB21624	ERR2027889	Bos_taurus	Rumen	UK	beef
ERR2027890	PRJEB21624	ERR2027890	Bos_taurus	Rumen	UK	beef
ERR2027891	PRJEB21624	ERR2027891	Bos_taurus	Rumen	UK	beef
ERR2027892	PRJEB21624	ERR2027892	Bos_taurus	Rumen	UK	beef
ERR2027893	PRJEB21624	ERR2027893	Bos_taurus	Rumen	UK	beef
ERR2027894	PRJEB21624	ERR2027894	Bos_taurus	Rumen	UK	beef
ERR2027895	PRJEB21624	ERR2027895	Bos_taurus	Rumen	UK	beef
ERR2027896	PRJEB21624	ERR2027896	Bos_taurus	Rumen	UK	beef
ERR2027897	PRJEB21624	ERR2027897	Bos_taurus	Rumen	UK	beef
ERR2027898	PRJEB21624	ERR2027898	Bos_taurus	Rumen	UK	beef
ERR2027899	PRJEB21624	ERR2027899	Bos_taurus	Rumen	UK	beef
ERR2027900	PRJEB21624	ERR2027900	Bos_taurus	Rumen	UK	beef
ERR2027901	PRJEB21624	ERR2027901	Bos_taurus	Rumen	UK	beef
ERR2027902	PRJEB21624	ERR2027902	Bos_taurus	Rumen	UK	beef
ERR2027903	PRJEB21624	ERR2027903	Bos_taurus	Rumen	UK	beef
ERR2027904	PRJEB21624	ERR2027904	Bos_taurus	Rumen	UK	beef
ERR2027905	PRJEB21624	ERR2027905	Bos_taurus	Rumen	UK	beef
ERR2027906	PRJEB21624	ERR2027906	Bos_taurus	Rumen	UK	beef
ERR2027907	PRJEB21624	ERR2027907	Bos_taurus	Rumen	UK	beef
ERR2027908	PRJEB21624	ERR2027908	Bos_taurus	Rumen	UK	beef
ERR2027909	PRJEB21624	ERR2027909	Bos_taurus	Rumen	UK	beef
ERR2027910	PRJEB21624	ERR2027910	Bos_taurus	Rumen	UK	beef
ERR2027911	PRJEB21624	ERR2027911	Bos_taurus	Rumen	UK	beef
ERR2027912	PRJEB21624	ERR2027912	Bos_taurus	Rumen	UK	beef
ERR2027913	PRJEB21624	ERR2027913	Bos_taurus	Rumen	UK	beef
ERR2027914	PRJEB21624	ERR2027914	Bos_taurus	Rumen	UK	beef
ERR2027915	PRJEB21624	ERR2027915	Bos_taurus	Rumen	UK	beef
ERR2027916	PRJEB21624	ERR2027916	Bos_taurus	Rumen	UK	beef
ERR2027917	PRJEB21624	ERR2027917	Bos_taurus	Rumen	UK	beef
ERR2027918	PRJEB21624	ERR2027918	Bos_taurus	Rumen	UK	beef
ERR2027919	PRJEB21624	ERR2027919	Bos_taurus	Rumen	UK	beef
ERR2027920	PRJEB21624	ERR2027920	Bos_taurus	Rumen	UK	beef
ERR2027921	PRJEB21624	ERR2027921	Bos_taurus	Rumen	UK	beef
ERR2027922	PRJEB21624	ERR2027922	Bos_taurus	Rumen	UK	beef
ERR2027923	PRJEB21624	ERR2027923	Bos_taurus	Rumen	UK	beef
ERR2027924	PRJEB21624	ERR2027924	Bos_taurus	Rumen	UK	beef
ERR2027925	PRJEB21624	ERR2027925	Bos_taurus	Rumen	UK	beef
ERR2027926	PRJEB21624	ERR2027926	Bos_taurus	Rumen	UK	beef
ERR2027927	PRJEB21624	ERR2027927	Bos_taurus	Rumen	UK	beef
ERR2027928	PRJEB21624	ERR2027928	Bos_taurus	Rumen	UK	beef
ERR2027929	PRJEB21624	ERR2027929	Bos_taurus	Rumen	UK	beef
ERR2027930	PRJEB21624	ERR2027930	Bos_taurus	Rumen	UK	beef
ERR2282092	PRJEB21624	ERR2282092	Bos_taurus	Rumen	UK	beef
ERR2530126	PRJEB21624	ERR2530126	Bos_taurus	Rumen	UK	beef
ERR2530127	PRJEB21624	ERR2530127	Bos_taurus	Rumen	UK	beef
ERR3201375	PRJEB31266	ERR3201375	Bos_taurus	Rumen	UK	beef
ERR3201376	PRJEB31266	ERR3201376	Bos_taurus	Rumen	UK	beef
ERR3201377	PRJEB31266	ERR3201377	Bos_taurus	Rumen	UK	beef
ERR3201378	PRJEB31266	ERR3201378	Bos_taurus	Rumen	UK	beef
ERR3201379	PRJEB31266	ERR3201379	Bos_taurus	Rumen	UK	beef
ERR3201380	PRJEB31266	ERR3201380	Bos_taurus	Rumen	UK	beef
ERR3201381	PRJEB31266	ERR3201381	Bos_taurus	Rumen	UK	beef
ERR3201382	PRJEB31266	ERR3201382	Bos_taurus	Rumen	UK	beef
ERR3201383	PRJEB31266	ERR3201383	Bos_taurus	Rumen	UK	beef
ERR3201384	PRJEB31266	ERR3201384	Bos_taurus	Rumen	UK	beef
ERR3201385	PRJEB31266	ERR3201385	Bos_taurus	Rumen	UK	beef
ERR3201386	PRJEB31266	ERR3201386	Bos_taurus	Rumen	UK	beef
ERR3201387	PRJEB31266	ERR3201387	Bos_taurus	Rumen	UK	beef
ERR3201388	PRJEB31266	ERR3201388	Bos_taurus	Rumen	UK	beef
ERR3201389	PRJEB31266	ERR3201389	Bos_taurus	Rumen	UK	beef
ERR3201390	PRJEB31266	ERR3201390	Bos_taurus	Rumen	UK	beef
ERR3201391	PRJEB31266	ERR3201391	Bos_taurus	Rumen	UK	beef
ERR3201392	PRJEB31266	ERR3201392	Bos_taurus	Rumen	UK	beef
ERR3201393	PRJEB31266	ERR3201393	Bos_taurus	Rumen	UK	beef
ERR3201394	PRJEB31266	ERR3201394	Bos_taurus	Rumen	UK	beef
ERR3201395	PRJEB31266	ERR3201395	Bos_taurus	Rumen	UK	beef
ERR3201396	PRJEB31266	ERR3201396	Bos_taurus	Rumen	UK	beef
ERR3201397	PRJEB31266	ERR3201397	Bos_taurus	Rumen	UK	beef
ERR3201398	PRJEB31266	ERR3201398	Bos_taurus	Rumen	UK	beef
ERR3201399	PRJEB31266	ERR3201399	Bos_taurus	Rumen	UK	beef
ERR3201400	PRJEB31266	ERR3201400	Bos_taurus	Rumen	UK	beef
ERR3201401	PRJEB31266	ERR3201401	Bos_taurus	Rumen	UK	beef
ERR3201402	PRJEB31266	ERR3201402	Bos_taurus	Rumen	UK	beef
ERR3201403	PRJEB31266	ERR3201403	Bos_taurus	Rumen	UK	beef
ERR3201404	PRJEB31266	ERR3201404	Bos_taurus	Rumen	UK	beef
ERR3201405	PRJEB31266	ERR3201405	Bos_taurus	Rumen	UK	beef
ERR3201406	PRJEB31266	ERR3201406	Bos_taurus	Rumen	UK	beef
ERR3201407	PRJEB31266	ERR3201407	Bos_taurus	Rumen	UK	beef
ERR3201408	PRJEB31266	ERR3201408	Bos_taurus	Rumen	UK	beef
ERR3201409	PRJEB31266	ERR3201409	Bos_taurus	Rumen	UK	beef
ERR3201410	PRJEB31266	ERR3201410	Bos_taurus	Rumen	UK	beef
ERR3201411	PRJEB31266	ERR3201411	Bos_taurus	Rumen	UK	beef
ERR3201412	PRJEB31266	ERR3201412	Bos_taurus	Rumen	UK	beef
ERR3201413	PRJEB31266	ERR3201413	Bos_taurus	Rumen	UK	beef
ERR3201414	PRJEB31266	ERR3201414	Bos_taurus	Rumen	UK	beef
ERR3201415	PRJEB31266	ERR3201415	Bos_taurus	Rumen	UK	beef
ERR3201416	PRJEB31266	ERR3201416	Bos_taurus	Rumen	UK	beef
ERR3201417	PRJEB31266	ERR3201417	Bos_taurus	Rumen	UK	beef
ERR3201418	PRJEB31266	ERR3201418	Bos_taurus	Rumen	UK	beef
ERR3201419	PRJEB31266	ERR3201419	Bos_taurus	Rumen	UK	beef
ERR3201420	PRJEB31266	ERR3201420	Bos_taurus	Rumen	UK	beef
ERR3201421	PRJEB31266	ERR3201421	Bos_taurus	Rumen	UK	beef
ERR3201422	PRJEB31266	ERR3201422	Bos_taurus	Rumen	UK	beef
ERR3211439	PRJEB31266	ERR3211439	Bos_taurus	Rumen	UK	beef
ERR3211440	PRJEB31266	ERR3211440	Bos_taurus	Rumen	UK	beef
ERR3211441	PRJEB31266	ERR3211441	Bos_taurus	Rumen	UK	beef
ERR3211442	PRJEB31266	ERR3211442	Bos_taurus	Rumen	UK	beef
ERR3211443	PRJEB31266	ERR3211443	Bos_taurus	Rumen	UK	beef
ERR3211444	PRJEB31266	ERR3211444	Bos_taurus	Rumen	UK	beef
ERR3211445	PRJEB31266	ERR3211445	Bos_taurus	Rumen	UK	beef
ERR3211446	PRJEB31266	ERR3211446	Bos_taurus	Rumen	UK	beef
ERR3211447	PRJEB31266	ERR3211447	Bos_taurus	Rumen	UK	beef
ERR3211448	PRJEB31266	ERR3211448	Bos_taurus	Rumen	UK	beef
ERR3211449	PRJEB31266	ERR3211449	Bos_taurus	Rumen	UK	beef
ERR3211450	PRJEB31266	ERR3211450	Bos_taurus	Rumen	UK	beef
ERR3211451	PRJEB31266	ERR3211451	Bos_taurus	Rumen	UK	beef
ERR3211452	PRJEB31266	ERR3211452	Bos_taurus	Rumen	UK	beef
ERR3211453	PRJEB31266	ERR3211453	Bos_taurus	Rumen	UK	beef
ERR3211454	PRJEB31266	ERR3211454	Bos_taurus	Rumen	UK	beef
ERR3211455	PRJEB31266	ERR3211455	Bos_taurus	Rumen	UK	beef
ERR3211456	PRJEB31266	ERR3211456	Bos_taurus	Rumen	UK	beef
ERR3211457	PRJEB31266	ERR3211457	Bos_taurus	Rumen	UK	beef
ERR3211458	PRJEB31266	ERR3211458	Bos_taurus	Rumen	UK	beef
ERR3211459	PRJEB31266	ERR3211459	Bos_taurus	Rumen	UK	beef
ERR3211460	PRJEB31266	ERR3211460	Bos_taurus	Rumen	UK	beef
ERR3211461	PRJEB31266	ERR3211461	Bos_taurus	Rumen	UK	beef
ERR3211462	PRJEB31266	ERR3211462	Bos_taurus	Rumen	UK	beef
ERR3211463	PRJEB31266	ERR3211463	Bos_taurus	Rumen	UK	beef
ERR3211464	PRJEB31266	ERR3211464	Bos_taurus	Rumen	UK	beef
ERR3211465	PRJEB31266	ERR3211465	Bos_taurus	Rumen	UK	beef
ERR3211466	PRJEB31266	ERR3211466	Bos_taurus	Rumen	UK	beef
ERR3211467	PRJEB31266	ERR3211467	Bos_taurus	Rumen	UK	beef
ERR3211468	PRJEB31266	ERR3211468	Bos_taurus	Rumen	UK	beef
ERR3211469	PRJEB31266	ERR3211469	Bos_taurus	Rumen	UK	beef
ERR3211470	PRJEB31266	ERR3211470	Bos_taurus	Rumen	UK	beef
ERR3211471	PRJEB31266	ERR3211471	Bos_taurus	Rumen	UK	beef
ERR3211472	PRJEB31266	ERR3211472	Bos_taurus	Rumen	UK	beef
ERR3211473	PRJEB31266	ERR3211473	Bos_taurus	Rumen	UK	beef
ERR3211474	PRJEB31266	ERR3211474	Bos_taurus	Rumen	UK	beef
ERR3211475	PRJEB31266	ERR3211475	Bos_taurus	Rumen	UK	beef
ERR3211476	PRJEB31266	ERR3211476	Bos_taurus	Rumen	UK	beef
ERR3211477	PRJEB31266	ERR3211477	Bos_taurus	Rumen	UK	beef
ERR3211478	PRJEB31266	ERR3211478	Bos_taurus	Rumen	UK	beef
ERR3211479	PRJEB31266	ERR3211479	Bos_taurus	Rumen	UK	beef
ERR3211480	PRJEB31266	ERR3211480	Bos_taurus	Rumen	UK	beef
ERR3211481	PRJEB31266	ERR3211481	Bos_taurus	Rumen	UK	beef
ERR3211482	PRJEB31266	ERR3211482	Bos_taurus	Rumen	UK	beef
ERR3211483	PRJEB31266	ERR3211483	Bos_taurus	Rumen	UK	beef
ERR3211484	PRJEB31266	ERR3211484	Bos_taurus	Rumen	UK	beef
ERR3211485	PRJEB31266	ERR3211485	Bos_taurus	Rumen	UK	beef
ERR3211486	PRJEB31266	ERR3211486	Bos_taurus	Rumen	UK	beef
ERR3220178	PRJEB31266	ERR3220178	Bos_taurus	Rumen	UK	beef
ERR3220179	PRJEB31266	ERR3220179	Bos_taurus	Rumen	UK	beef
ERR3220180	PRJEB31266	ERR3220180	Bos_taurus	Rumen	UK	beef
ERR3220181	PRJEB31266	ERR3220181	Bos_taurus	Rumen	UK	beef
ERR3220182	PRJEB31266	ERR3220182	Bos_taurus	Rumen	UK	beef
ERR3220183	PRJEB31266	ERR3220183	Bos_taurus	Rumen	UK	beef
ERR3220184	PRJEB31266	ERR3220184	Bos_taurus	Rumen	UK	beef
ERR3220185	PRJEB31266	ERR3220185	Bos_taurus	Rumen	UK	beef
ERR3220186	PRJEB31266	ERR3220186	Bos_taurus	Rumen	UK	beef
ERR3220187	PRJEB31266	ERR3220187	Bos_taurus	Rumen	UK	beef
ERR3220188	PRJEB31266	ERR3220188	Bos_taurus	Rumen	UK	beef
ERR3220189	PRJEB31266	ERR3220189	Bos_taurus	Rumen	UK	beef
ERR3220190	PRJEB31266	ERR3220190	Bos_taurus	Rumen	UK	beef
ERR3220191	PRJEB31266	ERR3220191	Bos_taurus	Rumen	UK	beef
ERR3220192	PRJEB31266	ERR3220192	Bos_taurus	Rumen	UK	beef
ERR3220193	PRJEB31266	ERR3220193	Bos_taurus	Rumen	UK	beef
ERR3220194	PRJEB31266	ERR3220194	Bos_taurus	Rumen	UK	beef
ERR3220195	PRJEB31266	ERR3220195	Bos_taurus	Rumen	UK	beef
ERR3220196	PRJEB31266	ERR3220196	Bos_taurus	Rumen	UK	beef
ERR3220197	PRJEB31266	ERR3220197	Bos_taurus	Rumen	UK	beef
ERR3220198	PRJEB31266	ERR3220198	Bos_taurus	Rumen	UK	beef
ERR3220199	PRJEB31266	ERR3220199	Bos_taurus	Rumen	UK	beef
ERR3220200	PRJEB31266	ERR3220200	Bos_taurus	Rumen	UK	beef
ERR3220201	PRJEB31266	ERR3220201	Bos_taurus	Rumen	UK	beef
ERR3220202	PRJEB31266	ERR3220202	Bos_taurus	Rumen	UK	beef
ERR3220203	PRJEB31266	ERR3220203	Bos_taurus	Rumen	UK	beef
ERR3220204	PRJEB31266	ERR3220204	Bos_taurus	Rumen	UK	beef
ERR3220205	PRJEB31266	ERR3220205	Bos_taurus	Rumen	UK	beef
ERR3220206	PRJEB31266	ERR3220206	Bos_taurus	Rumen	UK	beef
ERR3220207	PRJEB31266	ERR3220207	Bos_taurus	Rumen	UK	beef
ERR3220208	PRJEB31266	ERR3220208	Bos_taurus	Rumen	UK	beef
ERR3220209	PRJEB31266	ERR3220209	Bos_taurus	Rumen	UK	beef
ERR3220210	PRJEB31266	ERR3220210	Bos_taurus	Rumen	UK	beef
ERR3220211	PRJEB31266	ERR3220211	Bos_taurus	Rumen	UK	beef
ERR3220212	PRJEB31266	ERR3220212	Bos_taurus	Rumen	UK	beef
ERR3220213	PRJEB31266	ERR3220213	Bos_taurus	Rumen	UK	beef
ERR3220214	PRJEB31266	ERR3220214	Bos_taurus	Rumen	UK	beef
ERR3220215	PRJEB31266	ERR3220215	Bos_taurus	Rumen	UK	beef
ERR3220216	PRJEB31266	ERR3220216	Bos_taurus	Rumen	UK	beef
ERR3220217	PRJEB31266	ERR3220217	Bos_taurus	Rumen	UK	beef
ERR3220218	PRJEB31266	ERR3220218	Bos_taurus	Rumen	UK	beef
ERR3220219	PRJEB31266	ERR3220219	Bos_taurus	Rumen	UK	beef
ERR3220220	PRJEB31266	ERR3220220	Bos_taurus	Rumen	UK	beef
ERR3220221	PRJEB31266	ERR3220221	Bos_taurus	Rumen	UK	beef
ERR3220222	PRJEB31266	ERR3220222	Bos_taurus	Rumen	UK	beef
ERR3220223	PRJEB31266	ERR3220223	Bos_taurus	Rumen	UK	beef
ERR3220224	PRJEB31266	ERR3220224	Bos_taurus	Rumen	UK	beef
ERR3220225	PRJEB31266	ERR3220225	Bos_taurus	Rumen	UK	beef
ERR3224567	PRJEB31266	ERR3224567	Bos_taurus	Rumen	UK	beef
ERR3224568	PRJEB31266	ERR3224568	Bos_taurus	Rumen	UK	beef
ERR3224569	PRJEB31266	ERR3224569	Bos_taurus	Rumen	UK	beef
ERR3224570	PRJEB31266	ERR3224570	Bos_taurus	Rumen	UK	beef
ERR3224571	PRJEB31266	ERR3224571	Bos_taurus	Rumen	UK	beef
ERR3224572	PRJEB31266	ERR3224572	Bos_taurus	Rumen	UK	beef
ERR3224573	PRJEB31266	ERR3224573	Bos_taurus	Rumen	UK	beef
ERR3224574	PRJEB31266	ERR3224574	Bos_taurus	Rumen	UK	beef
ERR3224575	PRJEB31266	ERR3224575	Bos_taurus	Rumen	UK	beef
ERR3224576	PRJEB31266	ERR3224576	Bos_taurus	Rumen	UK	beef
ERR3224577	PRJEB31266	ERR3224577	Bos_taurus	Rumen	UK	beef
ERR3224578	PRJEB31266	ERR3224578	Bos_taurus	Rumen	UK	beef
ERR3224579	PRJEB31266	ERR3224579	Bos_taurus	Rumen	UK	beef
ERR3224580	PRJEB31266	ERR3224580	Bos_taurus	Rumen	UK	beef
ERR3224581	PRJEB31266	ERR3224581	Bos_taurus	Rumen	UK	beef
ERR3224582	PRJEB31266	ERR3224582	Bos_taurus	Rumen	UK	beef
ERR3224583	PRJEB31266	ERR3224583	Bos_taurus	Rumen	UK	beef
ERR3224584	PRJEB31266	ERR3224584	Bos_taurus	Rumen	UK	beef
ERR3224585	PRJEB31266	ERR3224585	Bos_taurus	Rumen	UK	beef
ERR3224586	PRJEB31266	ERR3224586	Bos_taurus	Rumen	UK	beef
ERR3224587	PRJEB31266	ERR3224587	Bos_taurus	Rumen	UK	beef
ERR3224588	PRJEB31266	ERR3224588	Bos_taurus	Rumen	UK	beef
ERR3224589	PRJEB31266	ERR3224589	Bos_taurus	Rumen	UK	beef
ERR3224590	PRJEB31266	ERR3224590	Bos_taurus	Rumen	UK	beef
ERR3224591	PRJEB31266	ERR3224591	Bos_taurus	Rumen	UK	beef
ERR3224592	PRJEB31266	ERR3224592	Bos_taurus	Rumen	UK	beef
ERR3224593	PRJEB31266	ERR3224593	Bos_taurus	Rumen	UK	beef
ERR3224594	PRJEB31266	ERR3224594	Bos_taurus	Rumen	UK	beef
ERR3224595	PRJEB31266	ERR3224595	Bos_taurus	Rumen	UK	beef
ERR3224596	PRJEB31266	ERR3224596	Bos_taurus	Rumen	UK	beef
ERR3224597	PRJEB31266	ERR3224597	Bos_taurus	Rumen	UK	beef
ERR3224598	PRJEB31266	ERR3224598	Bos_taurus	Rumen	UK	beef
ERR3224599	PRJEB31266	ERR3224599	Bos_taurus	Rumen	UK	beef
ERR3224600	PRJEB31266	ERR3224600	Bos_taurus	Rumen	UK	beef
ERR3224601	PRJEB31266	ERR3224601	Bos_taurus	Rumen	UK	beef
ERR3224602	PRJEB31266	ERR3224602	Bos_taurus	Rumen	UK	beef
ERR3224603	PRJEB31266	ERR3224603	Bos_taurus	Rumen	UK	beef
ERR3224604	PRJEB31266	ERR3224604	Bos_taurus	Rumen	UK	beef
ERR3224605	PRJEB31266	ERR3224605	Bos_taurus	Rumen	UK	beef
ERR3224606	PRJEB31266	ERR3224606	Bos_taurus	Rumen	UK	beef
ERR3224607	PRJEB31266	ERR3224607	Bos_taurus	Rumen	UK	beef
ERR3224608	PRJEB31266	ERR3224608	Bos_taurus	Rumen	UK	beef
ERR3224609	PRJEB31266	ERR3224609	Bos_taurus	Rumen	UK	beef
ERR3224610	PRJEB31266	ERR3224610	Bos_taurus	Rumen	UK	beef
ERR3224611	PRJEB31266	ERR3224611	Bos_taurus	Rumen	UK	beef
ERR3224612	PRJEB31266	ERR3224612	Bos_taurus	Rumen	UK	beef
ERR3224613	PRJEB31266	ERR3224613	Bos_taurus	Rumen	UK	beef
ERR3224614	PRJEB31266	ERR3224614	Bos_taurus	Rumen	UK	beef
ERR3275091	PRJEB31266	ERR3275091	Bos_taurus	Rumen	UK	beef
ERR3275092	PRJEB31266	ERR3275092	Bos_taurus	Rumen	UK	beef
ERR3275093	PRJEB31266	ERR3275093	Bos_taurus	Rumen	UK	beef
ERR3275094	PRJEB31266	ERR3275094	Bos_taurus	Rumen	UK	beef
ERR3275095	PRJEB31266	ERR3275095	Bos_taurus	Rumen	UK	beef
ERR3275096	PRJEB31266	ERR3275096	Bos_taurus	Rumen	UK	beef
ERR3275097	PRJEB31266	ERR3275097	Bos_taurus	Rumen	UK	beef
ERR3275098	PRJEB31266	ERR3275098	Bos_taurus	Rumen	UK	beef
ERR3275099	PRJEB31266	ERR3275099	Bos_taurus	Rumen	UK	beef
ERR3275100	PRJEB31266	ERR3275100	Bos_taurus	Rumen	UK	beef
ERR3275101	PRJEB31266	ERR3275101	Bos_taurus	Rumen	UK	beef
ERR3275102	PRJEB31266	ERR3275102	Bos_taurus	Rumen	UK	beef
ERR3275103	PRJEB31266	ERR3275103	Bos_taurus	Rumen	UK	beef
ERR3275104	PRJEB31266	ERR3275104	Bos_taurus	Rumen	UK	beef
ERR3275105	PRJEB31266	ERR3275105	Bos_taurus	Rumen	UK	beef
ERR3275106	PRJEB31266	ERR3275106	Bos_taurus	Rumen	UK	beef
ERR3275107	PRJEB31266	ERR3275107	Bos_taurus	Rumen	UK	beef
ERR3275108	PRJEB31266	ERR3275108	Bos_taurus	Rumen	UK	beef
ERR3275109	PRJEB31266	ERR3275109	Bos_taurus	Rumen	UK	beef
ERR3275110	PRJEB31266	ERR3275110	Bos_taurus	Rumen	UK	beef
ERR3275111	PRJEB31266	ERR3275111	Bos_taurus	Rumen	UK	beef
ERR3275112	PRJEB31266	ERR3275112	Bos_taurus	Rumen	UK	beef
ERR3275113	PRJEB31266	ERR3275113	Bos_taurus	Rumen	UK	beef
ERR3275114	PRJEB31266	ERR3275114	Bos_taurus	Rumen	UK	beef
ERR3275115	PRJEB31266	ERR3275115	Bos_taurus	Rumen	UK	beef
ERR3275116	PRJEB31266	ERR3275116	Bos_taurus	Rumen	UK	beef
ERR3275117	PRJEB31266	ERR3275117	Bos_taurus	Rumen	UK	beef
ERR3275118	PRJEB31266	ERR3275118	Bos_taurus	Rumen	UK	beef
ERR3275119	PRJEB31266	ERR3275119	Bos_taurus	Rumen	UK	beef
ERR3275120	PRJEB31266	ERR3275120	Bos_taurus	Rumen	UK	beef
ERR3275121	PRJEB31266	ERR3275121	Bos_taurus	Rumen	UK	beef
ERR3275122	PRJEB31266	ERR3275122	Bos_taurus	Rumen	UK	beef
ERR3275123	PRJEB31266	ERR3275123	Bos_taurus	Rumen	UK	beef
ERR3275124	PRJEB31266	ERR3275124	Bos_taurus	Rumen	UK	beef
ERR3275125	PRJEB31266	ERR3275125	Bos_taurus	Rumen	UK	beef
ERR3275126	PRJEB31266	ERR3275126	Bos_taurus	Rumen	UK	beef
ERR3275127	PRJEB31266	ERR3275127	Bos_taurus	Rumen	UK	beef
ERR3275128	PRJEB31266	ERR3275128	Bos_taurus	Rumen	UK	beef
ERR3275129	PRJEB31266	ERR3275129	Bos_taurus	Rumen	UK	beef
ERR3275130	PRJEB31266	ERR3275130	Bos_taurus	Rumen	UK	beef
ERR3275131	PRJEB31266	ERR3275131	Bos_taurus	Rumen	UK	beef
ERR3275132	PRJEB31266	ERR3275132	Bos_taurus	Rumen	UK	beef
ERR3275133	PRJEB31266	ERR3275133	Bos_taurus	Rumen	UK	beef
ERR3275134	PRJEB31266	ERR3275134	Bos_taurus	Rumen	UK	beef
ERR3275135	PRJEB31266	ERR3275135	Bos_taurus	Rumen	UK	beef
ERR3275136	PRJEB31266	ERR3275136	Bos_taurus	Rumen	UK	beef
ERR3275137	PRJEB31266	ERR3275137	Bos_taurus	Rumen	UK	beef
ERR3275138	PRJEB31266	ERR3275138	Bos_taurus	Rumen	UK	beef
ERR833046	PRJEB8939	ERR833046	Bos_taurus	Rumen	UK	beef
ERR833047	PRJEB8939	ERR833047	Bos_taurus	Rumen	UK	beef
ERR833048	PRJEB8939	ERR833048	Bos_taurus	Rumen	UK	beef
ERR833049	PRJEB8939	ERR833049	Bos_taurus	Rumen	UK	beef
ERR833050	PRJEB8939	ERR833050	Bos_taurus	Rumen	UK	beef
ERR833051	PRJEB8939	ERR833051	Bos_taurus	Rumen	UK	beef
ERR833052	PRJEB8939	ERR833052	Bos_taurus	Rumen	UK	beef
ERR833211	PRJEB8939	ERR833211	Bos_taurus	Rumen	UK	beef
ERR833212	PRJEB8939	ERR833212	Bos_taurus	Rumen	UK	beef
ERR833213	PRJEB8939	ERR833213	Bos_taurus	Rumen	UK	beef
ERR833214	PRJEB8939	ERR833214	Bos_taurus	Rumen	UK	beef
ERR833215	PRJEB8939	ERR833215	Bos_taurus	Rumen	UK	beef
ERR833216	PRJEB8939	ERR833216	Bos_taurus	Rumen	UK	beef
ERR833217	PRJEB8939	ERR833217	Bos_taurus	Rumen	UK	beef
ERR983262	PRJEB10338	ERR983262	Bos_taurus	Rumen	UK	beef
ERR983263	PRJEB10338	ERR983263	Bos_taurus	Rumen	UK	beef
ERR983264	PRJEB10338	ERR983264	Bos_taurus	Rumen	UK	beef
ERR983265	PRJEB10338	ERR983265	Bos_taurus	Rumen	UK	beef
ERR983266	PRJEB10338	ERR983266	Bos_taurus	Rumen	UK	beef
ERR983267	PRJEB10338	ERR983267	Bos_taurus	Rumen	UK	beef
ERR983268	PRJEB10338	ERR983268	Bos_taurus	Rumen	UK	beef
ERR983269	PRJEB10338	ERR983269	Bos_taurus	Rumen	UK	beef
ERR1278072	PRJEB12797	ERR1278072	Alces_alces	Rumen	Swedan	na
ERR1278073	PRJEB12797	ERR1278073	Alces_alces	Rumen	Swedan	na
ERR1278074	PRJEB12797	ERR1278074	Alces_alces	Rumen	Swedan	na
ERR1278103	PRJEB12797	ERR1278103	Alces_alces	Rumen	Swedan	na
ERR1278104	PRJEB12797	ERR1278104	Alces_alces	Rumen	Swedan	na
ERR1278105	PRJEB12797	ERR1278105	Alces_alces	Rumen	Swedan	na
ERR3801447	PRJEB33080	ERR3801447	Bos_taurus	Rumen	UK	dairy
ERR3801448	PRJEB33080	ERR3801448	Bos_taurus	Rumen	UK	dairy
ERR3801449	PRJEB33080	ERR3801449	Bos_taurus	Rumen	UK	dairy
ERR3801450	PRJEB33080	ERR3801450	Bos_taurus	Rumen	UK	dairy
ERR3801451	PRJEB33080	ERR3801451	Bos_taurus	Rumen	UK	dairy
ERR3801452	PRJEB33080	ERR3801452	Bos_taurus	Rumen	UK	dairy
ERR3801453	PRJEB33080	ERR3801453	Bos_taurus	Rumen	UK	dairy
ERR3801454	PRJEB33080	ERR3801454	Bos_taurus	Rumen	UK	dairy
ERR3801455	PRJEB33080	ERR3801455	Bos_taurus	Rumen	UK	dairy
ERR3801456	PRJEB33080	ERR3801456	Bos_taurus	Rumen	UK	dairy
ERR3801457	PRJEB33080	ERR3801457	Bos_taurus	Rumen	UK	dairy
ERR3801458	PRJEB33080	ERR3801458	Bos_taurus	Rumen	UK	dairy
ERR3801459	PRJEB33080	ERR3801459	Bos_taurus	Rumen	UK	dairy
ERR3801460	PRJEB33080	ERR3801460	Bos_taurus	Rumen	UK	dairy
ERR3801461	PRJEB33080	ERR3801461	Bos_taurus	Rumen	UK	dairy
ERR3801462	PRJEB33080	ERR3801462	Bos_taurus	Rumen	UK	dairy
ERR3801463	PRJEB33080	ERR3801463	Bos_taurus	Rumen	UK	dairy
ERR3801464	PRJEB33080	ERR3801464	Bos_taurus	Rumen	UK	dairy
ERR3801465	PRJEB33080	ERR3801465	Bos_taurus	Rumen	UK	dairy
ERR3801466	PRJEB33080	ERR3801466	Bos_taurus	Rumen	UK	dairy
ERR3801467	PRJEB33080	ERR3801467	Bos_taurus	Rumen	UK	dairy
ERR3801468	PRJEB33080	ERR3801468	Bos_taurus	Rumen	UK	dairy
ERR3801469	PRJEB33080	ERR3801469	Bos_taurus	Rumen	UK	dairy
ERR3801470	PRJEB33080	ERR3801470	Bos_taurus	Rumen	UK	dairy
ERR3801471	PRJEB33080	ERR3801471	Bos_taurus	Rumen	UK	dairy
ERR3801472	PRJEB33080	ERR3801472	Bos_taurus	Rumen	UK	dairy
ERR3801473	PRJEB33080	ERR3801473	Bos_taurus	Rumen	UK	dairy
ERR3801474	PRJEB33080	ERR3801474	Bos_taurus	Rumen	UK	dairy
ERR3801475	PRJEB33080	ERR3801475	Bos_taurus	Rumen	UK	dairy
ERR3801476	PRJEB33080	ERR3801476	Bos_taurus	Rumen	UK	dairy
ERR3801477	PRJEB33080	ERR3801477	Bos_taurus	Rumen	UK	dairy
ERR3801478	PRJEB33080	ERR3801478	Bos_taurus	Rumen	UK	dairy
ERR3801479	PRJEB33080	ERR3801479	Bos_taurus	Rumen	UK	dairy
ERR3801480	PRJEB33080	ERR3801480	Bos_taurus	Rumen	UK	dairy
ERR3801481	PRJEB33080	ERR3801481	Bos_taurus	Rumen	UK	dairy
ERR3801482	PRJEB33080	ERR3801482	Bos_taurus	Rumen	UK	dairy
ERR3801483	PRJEB33080	ERR3801483	Bos_taurus	Rumen	UK	dairy
ERR3801484	PRJEB33080	ERR3801484	Bos_taurus	Rumen	UK	dairy
ERR3801485	PRJEB33080	ERR3801485	Bos_taurus	Rumen	UK	dairy
ERR3801486	PRJEB33080	ERR3801486	Bos_taurus	Rumen	UK	dairy
ERR3801487	PRJEB33080	ERR3801487	Bos_taurus	Rumen	UK	dairy
ERR3801488	PRJEB33080	ERR3801488	Bos_taurus	Rumen	UK	dairy
ERR3801489	PRJEB33080	ERR3801489	Bos_taurus	Rumen	UK	dairy
ERR3801490	PRJEB33080	ERR3801490	Bos_taurus	Rumen	UK	dairy
ERR3801491	PRJEB33080	ERR3801491	Bos_taurus	Rumen	UK	dairy
ERR3801492	PRJEB33080	ERR3801492	Bos_taurus	Rumen	UK	dairy
ERR3801493	PRJEB33080	ERR3801493	Bos_taurus	Rumen	UK	dairy
ERR3801494	PRJEB33080	ERR3801494	Bos_taurus	Rumen	UK	dairy
ERR3515506	PRJEB34231	ERR3515506	Bos_taurus	Rumen	Canada	dairy
ERR3515507	PRJEB34231	ERR3515507	Bos_taurus	Rumen	Canada	dairy
ERR3515508	PRJEB34231	ERR3515508	Bos_taurus	Rumen	Canada	dairy
ERR3515509	PRJEB34231	ERR3515509	Bos_taurus	Rumen	Canada	dairy
ERR3515510	PRJEB34231	ERR3515510	Bos_taurus	Rumen	Canada	dairy
ERR3515511	PRJEB34231	ERR3515511	Bos_taurus	Rumen	Canada	dairy
ERR3515512	PRJEB34231	ERR3515512	Bos_taurus	Rumen	Canada	dairy
ERR3515513	PRJEB34231	ERR3515513	Bos_taurus	Rumen	Canada	dairy
ERR3515514	PRJEB34231	ERR3515514	Bos_taurus	Rumen	Canada	dairy
ERR3515515	PRJEB34231	ERR3515515	Bos_taurus	Rumen	Canada	dairy
ERR3515516	PRJEB34231	ERR3515516	Bos_taurus	Rumen	Canada	dairy
ERR3515517	PRJEB34231	ERR3515517	Bos_taurus	Rumen	Canada	dairy
ERR3515518	PRJEB34231	ERR3515518	Bos_taurus	Rumen	Canada	dairy
ERR3515519	PRJEB34231	ERR3515519	Bos_taurus	Rumen	Canada	dairy
ERR3515520	PRJEB34231	ERR3515520	Bos_taurus	Rumen	Canada	dairy
ERR3515521	PRJEB34231	ERR3515521	Bos_taurus	Rumen	Canada	dairy
ERR3515522	PRJEB34231	ERR3515522	Bos_taurus	Rumen	Canada	dairy
ERR3515523	PRJEB34231	ERR3515523	Bos_taurus	Rumen	Canada	dairy
ERR3515524	PRJEB34231	ERR3515524	Bos_taurus	Rumen	Canada	dairy
ERR3515525	PRJEB34231	ERR3515525	Bos_taurus	Rumen	Canada	dairy
ERR3515526	PRJEB34231	ERR3515526	Bos_taurus	Rumen	Canada	dairy
ERR3515527	PRJEB34231	ERR3515527	Bos_taurus	Rumen	Canada	dairy
ERR3515528	PRJEB34231	ERR3515528	Bos_taurus	Rumen	Canada	dairy
ERR3515529	PRJEB34231	ERR3515529	Bos_taurus	Rumen	Canada	dairy
ERR3515530	PRJEB34231	ERR3515530	Bos_taurus	Rumen	Canada	dairy
ERR3515531	PRJEB34231	ERR3515531	Bos_taurus	Rumen	Canada	dairy
ERR3515532	PRJEB34231	ERR3515532	Bos_taurus	Rumen	Canada	dairy
ERR3515533	PRJEB34231	ERR3515533	Bos_taurus	Rumen	Canada	dairy
ERR3515534	PRJEB34231	ERR3515534	Bos_taurus	Rumen	Canada	dairy
ERR3515535	PRJEB34231	ERR3515535	Bos_taurus	Rumen	Canada	dairy
ERR3515536	PRJEB34231	ERR3515536	Bos_taurus	Rumen	Canada	dairy
ERR3515537	PRJEB34231	ERR3515537	Bos_taurus	Rumen	Canada	dairy
ERR3525309	PRJEB34458	ERR3525309	Ovis_aries	Rumen	UK	na
ERR3525310	PRJEB34458	ERR3525310	Ovis_aries	Rumen	UK	na
ERR3525311	PRJEB34458	ERR3525311	Bos_taurus	Rumen	UK	dairy
ERR3525312	PRJEB34458	ERR3525312	Bos_taurus	Rumen	UK	dairy
ERR3525313	PRJEB34458	ERR3525313	Bos_taurus	Rumen	UK	dairy
ERR3525314	PRJEB34458	ERR3525314	Bos_taurus	Rumen	UK	dairy
ERR3525315	PRJEB34458	ERR3525315	Rangifer_tarandus	Rumen	UK	na
ERR3525316	PRJEB34458	ERR3525316	Rangifer_tarandus	Rumen	UK	na
ERR3525317	PRJEB34458	ERR3525317	Cervus_elaphus	Rumen	UK	na
ERR3525318	PRJEB34458	ERR3525318	Cervus_elaphus	Rumen	UK	na
ERR3525319	PRJEB34458	ERR3525319	Cervus_elaphus	Rumen	UK	na
ERR3525320	PRJEB34458	ERR3525320	Cervus_elaphus	Rumen	UK	na
ERR4297086	PRJEB39057	ERR4297086	Bos_indicus	Rumen	Kenya	na
ERR4297090	PRJEB39057	ERR4297090	Bos_indicus	Rumen	Kenya	na
ERR4297093	PRJEB39057	ERR4297093	Bos_indicus	Rumen	Kenya	na
ERR4297094	PRJEB39057	ERR4297094	Bos_indicus	Rumen	Kenya	na
ERR4297100	PRJEB39057	ERR4297100	Bos_indicus	Rumen	Kenya	na
ERR4297108	PRJEB39057	ERR4297108	Bos_indicus	Rumen	Kenya	na
ERR4297089	PRJEB39057	ERR4297089	Bos_indicus	Rumen	Kenya	na
ERR4297092	PRJEB39057	ERR4297092	Bos_indicus	Rumen	Kenya	na
ERR4297099	PRJEB39057	ERR4297099	Bos_indicus	Rumen	Kenya	na
ERR4297102	PRJEB39057	ERR4297102	Bos_indicus	Rumen	Kenya	na
ERR4297103	PRJEB39057	ERR4297103	Bos_indicus	Rumen	Kenya	na
ERR4297105	PRJEB39057	ERR4297105	Bos_indicus	Rumen	Kenya	na
ERR4297106	PRJEB39057	ERR4297106	Bos_indicus	Rumen	Kenya	na
ERR4297088	PRJEB39057	ERR4297088	Bos_indicus	Rumen	Kenya	na
ERR4297091	PRJEB39057	ERR4297091	Bos_indicus	Rumen	Kenya	na
ERR4297095	PRJEB39057	ERR4297095	Bos_indicus	Rumen	Kenya	na
ERR4297096	PRJEB39057	ERR4297096	Bos_indicus	Rumen	Kenya	na
ERR4297097	PRJEB39057	ERR4297097	Bos_indicus	Rumen	Kenya	na
ERR4297098	PRJEB39057	ERR4297098	Bos_indicus	Rumen	Kenya	na
ERR4297101	PRJEB39057	ERR4297101	Bos_indicus	Rumen	Kenya	na
ERR4297104	PRJEB39057	ERR4297104	Bos_indicus	Rumen	Kenya	na
ERR4297107	PRJEB39057	ERR4297107	Bos_indicus	Rumen	Kenya	na
ERR4297109	PRJEB39057	ERR4297109	Bos_indicus	Rumen	Kenya	na
SRR1206671	PRJNA202380	SRR1206671	Ovis_aries	Rumen	New Zeland	na
SRR1222429	PRJNA202380	SRR1222429	Ovis_aries	Rumen	New Zeland	na
SRR1222431	PRJNA202380	SRR1222431	Ovis_aries	Rumen	New Zeland	na
SRR1267595	PRJNA202380	SRR1267595	Ovis_aries	Rumen	New Zeland	na
SRR873595	PRJNA202380	SRR873595	Ovis_aries	Rumen	New Zeland	na
SRR873596	PRJNA202380	SRR873596	Ovis_aries	Rumen	New Zeland	na
SRR873597	PRJNA202380	SRR873597	Ovis_aries	Rumen	New Zeland	na
SRR873598	PRJNA202380	SRR873598	Ovis_aries	Rumen	New Zeland	na
SRR873599	PRJNA202380	SRR873599	Ovis_aries	Rumen	New Zeland	na
SRR873600	PRJNA202380	SRR873600	Ovis_aries	Rumen	New Zeland	na
SRR873601	PRJNA202380	SRR873601	Ovis_aries	Rumen	New Zeland	na
SRR873602	PRJNA202380	SRR873602	Ovis_aries	Rumen	New Zeland	na
SRR873603	PRJNA202380	SRR873603	Ovis_aries	Rumen	New Zeland	na
SRR873604	PRJNA202380	SRR873604	Ovis_aries	Rumen	New Zeland	na
SRR873605	PRJNA202380	SRR873605	Ovis_aries	Rumen	New Zeland	na
SRR873606	PRJNA202380	SRR873606	Ovis_aries	Rumen	New Zeland	na
SRR873607	PRJNA202380	SRR873607	Ovis_aries	Rumen	New Zeland	na
SRR873608	PRJNA202380	SRR873608	Ovis_aries	Rumen	New Zeland	na
SRR873609	PRJNA202380	SRR873609	Ovis_aries	Rumen	New Zeland	na
SRR873610	PRJNA202380	SRR873610	Ovis_aries	Rumen	New Zeland	na
SRR4435572	PRJNA214227	SRR4435572	Bison_bison	Rumen	USA	na
SRR4435573	PRJNA214227	SRR4435573	Bison_bison	Rumen	USA	na
SRR4435568	PRJNA214227	SRR4435568	Bison_bison	Rumen	USA	na
SRR4435569	PRJNA214227	SRR4435569	Bison_bison	Rumen	USA	na
SRR4435574	PRJNA214227	SRR4435574	Bison_bison	Rumen	USA	na
SRR4435575	PRJNA214227	SRR4435575	Bison_bison	Rumen	USA	na
SRR4435570	PRJNA214227	SRR4435570	Bison_bison	Rumen	USA	na
SRR4435571	PRJNA214227	SRR4435571	Bison_bison	Rumen	USA	na
SRR4435556	PRJNA214227	SRR4435556	Bos_taurus	Rumen	USA	na
SRR4435557	PRJNA214227	SRR4435557	Bos_taurus	Rumen	USA	na
SRR4435558	PRJNA214227	SRR4435558	Bos_taurus	Rumen	USA	na
SRR4435559	PRJNA214227	SRR4435559	Bos_taurus	Rumen	USA	na
SRR4435560	PRJNA214227	SRR4435560	Bos_taurus	Rumen	USA	na
SRR4435561	PRJNA214227	SRR4435561	Bos_taurus	Rumen	USA	na
SRR4435562	PRJNA214227	SRR4435562	Bos_taurus	Rumen	USA	na
SRR4435563	PRJNA214227	SRR4435563	Bos_taurus	Rumen	USA	na
SRR4435564	PRJNA214227	SRR4435564	Bos_taurus	Rumen	USA	na
SRR4435565	PRJNA214227	SRR4435565	Bos_taurus	Rumen	USA	na
SRR4435566	PRJNA214227	SRR4435566	Bos_taurus	Rumen	USA	na
SRR4435567	PRJNA214227	SRR4435567	Bos_taurus	Rumen	USA	na
SRR4435578	PRJNA214227	SRR4435578	Bos_taurus	Rumen	USA	na
SRR4435579	PRJNA214227	SRR4435579	Bos_taurus	Rumen	USA	na
SRR4435580	PRJNA214227	SRR4435580	Bos_taurus	Rumen	USA	na
SRR4435581	PRJNA214227	SRR4435581	Bos_taurus	Rumen	USA	na
SRR4435582	PRJNA214227	SRR4435582	Odocoileus_virginianus	Rumen	USA	na
SRR4435583	PRJNA214227	SRR4435583	Odocoileus_virginianus	Rumen	USA	na
SRR4435584	PRJNA214227	SRR4435584	Odocoileus_virginianus	Rumen	USA	na
SRR4435585	PRJNA214227	SRR4435585	Cervus_elaphus	Rumen	USA	na
SRR4435554	PRJNA214227	SRR4435554	Odocoileus_virginianus	Rumen	USA	na
SRR4435555	PRJNA214227	SRR4435555	Odocoileus_virginianus	Rumen	USA	na
SRR4435576	PRJNA214227	SRR4435576	Odocoileus_virginianus	Rumen	USA	na
SRR4435577	PRJNA214227	SRR4435577	Odocoileus_virginianus	Rumen	USA	na
SRR948123	PRJNA214227	SRR948123	Ovis_aries	Rumen	USA	na
SRR948124	PRJNA214227	SRR948124	Ovis_aries	Rumen	USA	na
SRR948125	PRJNA214227	SRR948125	Ovis_aries	Rumen	USA	na
SRR948129	PRJNA214227	SRR948129	Ovis_aries	Rumen	USA	na
SRR948132	PRJNA214227	SRR948132	Ovis_aries	Rumen	USA	na
SRR948135	PRJNA214227	SRR948135	Ovis_aries	Rumen	USA	na
SRR948136	PRJNA214227	SRR948136	Ovis_aries	Rumen	USA	na
SRR948137	PRJNA214227	SRR948137	Ovis_aries	Rumen	USA	na
SRR948088	PRJNA214227	SRR948088	Ovis_aries	Rumen	USA	na
SRR948090	PRJNA214227	SRR948090	Ovis_aries	Rumen	USA	na
SRR948091	PRJNA214227	SRR948091	Ovis_aries	Rumen	USA	na
SRR948118	PRJNA214227	SRR948118	Ovis_aries	Rumen	USA	na
SRR948119	PRJNA214227	SRR948119	Ovis_aries	Rumen	USA	na
SRR948120	PRJNA214227	SRR948120	Ovis_aries	Rumen	USA	na
SRR948121	PRJNA214227	SRR948121	Ovis_aries	Rumen	USA	na
SRR948122	PRJNA214227	SRR948122	Ovis_aries	Rumen	USA	na
SRR6197819	PRJNA366487	SRR6197819	Bos_taurus	Rumen	New Zeland	na
SRR6197820	PRJNA366487	SRR6197820	Bos_taurus	Rumen	New Zeland	na
SRR6197821	PRJNA366487	SRR6197821	Bos_taurus	Rumen	New Zeland	na
SRR6197822	PRJNA366487	SRR6197822	Bos_taurus	Rumen	New Zeland	na
SRR6197823	PRJNA366487	SRR6197823	Bos_taurus	Rumen	New Zeland	na
SRR6197824	PRJNA366487	SRR6197824	Bos_taurus	Rumen	New Zeland	na
SRR6197825	PRJNA366487	SRR6197825	Bos_taurus	Rumen	New Zeland	na
SRR6261384	PRJNA417197	SRR6261384	Capra_hircus	Rumen	India	na
SRR6261385	PRJNA417197	SRR6261385	Capra_hircus	Rumen	India	na
SRR6261386	PRJNA417197	SRR6261386	Capra_hircus	Rumen	India	na
SRR6261387	PRJNA417197	SRR6261387	Capra_hircus	Rumen	India	na
SRR6261388	PRJNA417197	SRR6261388	Capra_hircus	Rumen	India	na
SRR6261389	PRJNA417197	SRR6261389	Capra_hircus	Rumen	India	na
SRR8397881	PRJNA448333	SRR8397881	Bos_taurus	Rumen	Canada	beef
SRR8397882	PRJNA448334	SRR8397882	Bos_taurus	Rumen	Canada	beef
SRR8397883	PRJNA448335	SRR8397883	Bos_taurus	Rumen	Canada	beef
SRR8397884	PRJNA448336	SRR8397884	Bos_taurus	Rumen	Canada	beef
SRR8397885	PRJNA448337	SRR8397885	Bos_taurus	Rumen	Canada	beef
SRR8397886	PRJNA448338	SRR8397886	Bos_taurus	Rumen	Canada	beef
SRR8397887	PRJNA448339	SRR8397887	Bos_taurus	Rumen	Canada	beef
SRR8397888	PRJNA448340	SRR8397888	Bos_taurus	Rumen	Canada	beef
SRR8397889	PRJNA448341	SRR8397889	Bos_taurus	Rumen	Canada	beef
SRR8397890	PRJNA448342	SRR8397890	Bos_taurus	Rumen	Canada	beef
SRR8397891	PRJNA448343	SRR8397891	Bos_taurus	Rumen	Canada	beef
SRR8397892	PRJNA448344	SRR8397892	Bos_taurus	Rumen	Canada	beef
SRR8397893	PRJNA448345	SRR8397893	Bos_taurus	Rumen	Canada	beef
SRR8397894	PRJNA448346	SRR8397894	Bos_taurus	Rumen	Canada	beef
SRR8397895	PRJNA448347	SRR8397895	Bos_taurus	Rumen	Canada	beef
SRR8397896	PRJNA448348	SRR8397896	Bos_taurus	Rumen	Canada	beef
SRR8397897	PRJNA448349	SRR8397897	Bos_taurus	Rumen	Canada	beef
SRR8397898	PRJNA448350	SRR8397898	Bos_taurus	Rumen	Canada	beef
SRR8397899	PRJNA448351	SRR8397899	Bos_taurus	Rumen	Canada	beef
SRR8397900	PRJNA448352	SRR8397900	Bos_taurus	Rumen	Canada	beef
SRR8397901	PRJNA448353	SRR8397901	Bos_taurus	Rumen	Canada	beef
SRR8397902	PRJNA448354	SRR8397902	Bos_taurus	Rumen	Canada	beef
SRR8397903	PRJNA448355	SRR8397903	Bos_taurus	Rumen	Canada	beef
SRR8397904	PRJNA448356	SRR8397904	Bos_taurus	Rumen	Canada	beef
SRR8397905	PRJNA448357	SRR8397905	Bos_taurus	Rumen	Canada	beef
SRR8397906	PRJNA448358	SRR8397906	Bos_taurus	Rumen	Canada	beef
SRR8397907	PRJNA448359	SRR8397907	Bos_taurus	Rumen	Canada	beef
SRR8397908	PRJNA448360	SRR8397908	Bos_taurus	Rumen	Canada	beef
SRR8397909	PRJNA448361	SRR8397909	Bos_taurus	Rumen	Canada	beef
SRR8397910	PRJNA448362	SRR8397910	Bos_taurus	Rumen	Canada	beef
SRR8397911	PRJNA448363	SRR8397911	Bos_taurus	Rumen	Canada	beef
SRR8397912	PRJNA448364	SRR8397912	Bos_taurus	Rumen	Canada	beef
SRR8397913	PRJNA448365	SRR8397913	Bos_taurus	Rumen	Canada	beef
SRR8397914	PRJNA448366	SRR8397914	Bos_taurus	Rumen	Canada	beef
SRR8397915	PRJNA448367	SRR8397915	Bos_taurus	Rumen	Canada	beef
SRR8397916	PRJNA448368	SRR8397916	Bos_taurus	Rumen	Canada	beef
SRR8397917	PRJNA448369	SRR8397917	Bos_taurus	Rumen	Canada	beef
SRR8397918	PRJNA448370	SRR8397918	Bos_taurus	Rumen	Canada	beef
SRR8397919	PRJNA448371	SRR8397919	Bos_taurus	Rumen	Canada	beef
SRR8397920	PRJNA448372	SRR8397920	Bos_taurus	Rumen	Canada	beef
SRR8397921	PRJNA448373	SRR8397921	Bos_taurus	Rumen	Canada	beef
SRR8397922	PRJNA448374	SRR8397922	Bos_taurus	Rumen	Canada	beef
SRR8397923	PRJNA448375	SRR8397923	Bos_taurus	Rumen	Canada	beef
SRR8397924	PRJNA448376	SRR8397924	Bos_taurus	Rumen	Canada	beef
SRR8397925	PRJNA448377	SRR8397925	Bos_taurus	Rumen	Canada	beef
SRR8397926	PRJNA448378	SRR8397926	Bos_taurus	Rumen	Canada	beef
SRR8397927	PRJNA448379	SRR8397927	Bos_taurus	Rumen	Canada	beef
SRR8404214	PRJNA448380	SRR8404214	Bos_taurus	Rumen	Canada	beef
SRR7907945	PRJNA492173	SRR7907945	Capra_hircus	Rumen	China	na
SRR7907946	PRJNA492173	SRR7907946	Capra_hircus	Rumen	China	na
SRR7907947	PRJNA492173	SRR7907947	Capra_hircus	Rumen	China	na
SRR7907948	PRJNA492173	SRR7907948	Capra_hircus	Rumen	China	na
SRR7907953	PRJNA492173	SRR7907953	Capra_hircus	Rumen	China	na
SRR7907954	PRJNA492173	SRR7907954	Capra_hircus	Rumen	China	na
SRR7907955	PRJNA492173	SRR7907955	Capra_hircus	Rumen	China	na
SRR7907956	PRJNA492173	SRR7907956	Capra_hircus	Rumen	China	na
SRR7907957	PRJNA492173	SRR7907957	Capra_hircus	Rumen	China	na
SRR7907958	PRJNA492173	SRR7907958	Capra_hircus	Rumen	China	na
SRR7907959	PRJNA492173	SRR7907959	Capra_hircus	Rumen	China	na
SRR7907960	PRJNA492173	SRR7907960	Capra_hircus	Rumen	China	na
SRR7907961	PRJNA492173	SRR7907961	Capra_hircus	Rumen	China	na
SRR7907962	PRJNA492173	SRR7907962	Capra_hircus	Rumen	China	na
SRR7907939	PRJNA492173	SRR7907939	Capra_hircus	Rumen	China	na
SRR7907940	PRJNA492173	SRR7907940	Capra_hircus	Rumen	China	na
SRR7907941	PRJNA492173	SRR7907941	Capra_hircus	Rumen	China	na
SRR7907942	PRJNA492173	SRR7907942	Capra_hircus	Rumen	China	na
SRR7907943	PRJNA492173	SRR7907943	Capra_hircus	Rumen	China	na
SRR7907944	PRJNA492173	SRR7907944	Capra_hircus	Rumen	China	na
SRR7907949	PRJNA492173	SRR7907949	Capra_hircus	Rumen	China	na
SRR7907950	PRJNA492173	SRR7907950	Capra_hircus	Rumen	China	na
SRR7907951	PRJNA492173	SRR7907951	Capra_hircus	Rumen	China	na
SRR8387714	PRJNA512570	SRR8387714	Ovis_aries	Rumen	China	na
SRR8387715	PRJNA512570	SRR8387715	Ovis_aries	Rumen	China	na
SRR8387716	PRJNA512570	SRR8387716	Ovis_aries	Rumen	China	na
SRR8387717	PRJNA512570	SRR8387717	Ovis_aries	Rumen	China	na
SRR8387718	PRJNA512570	SRR8387718	Ovis_aries	Rumen	China	na
SRR8387719	PRJNA512570	SRR8387719	Ovis_aries	Rumen	China	na
SRR8387720	PRJNA512570	SRR8387720	Ovis_aries	Rumen	China	na
SRR8387721	PRJNA512570	SRR8387721	Ovis_aries	Rumen	China	na
SRR8591572	PRJNA522848	SRR8591572	Bos_taurus	Rumen	China	dairy
SRR8591573	PRJNA522848	SRR8591573	Bos_taurus	Rumen	China	dairy
SRR8591574	PRJNA522848	SRR8591574	Bos_taurus	Rumen	China	dairy
SRR8591575	PRJNA522848	SRR8591575	Bos_taurus	Rumen	China	dairy
SRR8591576	PRJNA522848	SRR8591576	Bos_taurus	Rumen	China	dairy
SRR8591577	PRJNA522848	SRR8591577	Bos_taurus	Rumen	China	dairy
SRR8591578	PRJNA522848	SRR8591578	Bos_taurus	Rumen	China	dairy
SRR8591579	PRJNA522848	SRR8591579	Bos_taurus	Rumen	China	dairy
SRR8591580	PRJNA522848	SRR8591580	Bos_taurus	Rumen	China	dairy
SRR8591581	PRJNA522848	SRR8591581	Bos_taurus	Rumen	China	dairy
SRR8591582	PRJNA522848	SRR8591582	Bos_taurus	Rumen	China	dairy
SRR8591583	PRJNA522848	SRR8591583	Bos_taurus	Rumen	China	dairy
SRR8698064	PRJNA526070	SRR8698064	Bos_taurus	Rumen	China	dairy
SRR8698086	PRJNA526070	SRR8698086	Bos_taurus	Rumen	China	dairy
SRR8698185	PRJNA526070	SRR8698185	Bos_taurus	Rumen	China	dairy
SRR8698222	PRJNA526070	SRR8698222	Bos_taurus	Rumen	China	dairy
SRR8698426	PRJNA526070	SRR8698426	Bos_taurus	Rumen	China	dairy
SRR8698427	PRJNA526070	SRR8698427	Bos_taurus	Rumen	China	dairy
SRR8698455	PRJNA526070	SRR8698455	Bos_taurus	Rumen	China	dairy
SRR8698509	PRJNA526070	SRR8698509	Bos_taurus	Rumen	China	dairy
SRR8698536	PRJNA526070	SRR8698536	Bos_taurus	Rumen	China	dairy
SRR8698737	PRJNA526070	SRR8698737	Bos_taurus	Rumen	China	dairy
SRR8703638	PRJNA526070	SRR8703638	Bos_taurus	Rumen	China	dairy
SRR8703775	PRJNA526070	SRR8703775	Bos_taurus	Rumen	China	dairy
SRR8703788	PRJNA526070	SRR8703788	Bos_taurus	Rumen	China	dairy
SRR8703807	PRJNA526070	SRR8703807	Bos_taurus	Rumen	China	dairy
SRR8703845	PRJNA526070	SRR8703845	Bos_taurus	Rumen	China	dairy
SRR8704694	PRJNA526070	SRR8704694	Bos_taurus	Rumen	China	dairy
SRR9006654	PRJNA539637	SRR9006654	Ovis_aries	Rumen	New Zeland	na
SRR9006655	PRJNA539637	SRR9006655	Ovis_aries	Rumen	New Zeland	na
SRR9006729	PRJNA539637	SRR9006729	Ovis_aries	Rumen	New Zeland	na
SRR9006730	PRJNA539637	SRR9006730	Ovis_aries	Rumen	New Zeland	na
SRR9006804	PRJNA539637	SRR9006804	Ovis_aries	Rumen	New Zeland	na
SRR9006805	PRJNA539637	SRR9006805	Ovis_aries	Rumen	New Zeland	na
SRR9651404	PRJNA552122	SRR9651404	Capra_hircus	Rumen	China	na
SRR9651405	PRJNA552122	SRR9651405	Capra_hircus	Rumen	China	na
SRR9651406	PRJNA552122	SRR9651406	Capra_hircus	Rumen	China	na
SRR9651407	PRJNA552122	SRR9651407	Capra_hircus	Rumen	China	na
SRR9651408	PRJNA552122	SRR9651408	Capra_hircus	Rumen	China	na
SRR9651409	PRJNA552122	SRR9651409	Capra_hircus	Rumen	China	na
SRR9651410	PRJNA552122	SRR9651410	Capra_hircus	Rumen	China	na
SRR9651411	PRJNA552122	SRR9651411	Capra_hircus	Rumen	China	na
SRR9651412	PRJNA552122	SRR9651412	Capra_hircus	Rumen	China	na
SRR9651413	PRJNA552122	SRR9651413	Capra_hircus	Rumen	China	na
SRR9651414	PRJNA552122	SRR9651414	Capra_hircus	Rumen	China	na
SRR9651415	PRJNA552122	SRR9651415	Capra_hircus	Rumen	China	na
SRR9651416	PRJNA552122	SRR9651416	Capra_hircus	Rumen	China	na
SRR9651417	PRJNA552122	SRR9651417	Capra_hircus	Rumen	China	na
SRR9651418	PRJNA552122	SRR9651418	Capra_hircus	Rumen	China	na
SRR9651419	PRJNA552122	SRR9651419	Capra_hircus	Rumen	China	na
SRR10765500	PRJNA597489	SRR10765500	Bos_taurus	Rumen	China	dairy
SRR10765501	PRJNA597489	SRR10765501	Bos_taurus	Rumen	China	dairy
SRR10765502	PRJNA597489	SRR10765502	Bos_taurus	Rumen	China	dairy
SRR10765503	PRJNA597489	SRR10765503	Bos_taurus	Rumen	China	dairy
SRR10765504	PRJNA597489	SRR10765504	Bos_taurus	Rumen	China	dairy
SRR10765505	PRJNA597489	SRR10765505	Bos_taurus	Rumen	China	dairy
SRR10765506	PRJNA597489	SRR10765506	Bos_taurus	Rumen	China	dairy
SRR10765507	PRJNA597489	SRR10765507	Bos_taurus	Rumen	China	dairy
SRR10765508	PRJNA597489	SRR10765508	Bos_taurus	Rumen	China	dairy
SRR10765509	PRJNA597489	SRR10765509	Bos_taurus	Rumen	China	dairy
SRR10765510	PRJNA597489	SRR10765510	Bos_taurus	Rumen	China	dairy
SRR10765511	PRJNA597489	SRR10765511	Bos_taurus	Rumen	China	dairy
SRR10765512	PRJNA597489	SRR10765512	Bos_taurus	Rumen	China	dairy
SRR10765513	PRJNA597489	SRR10765513	Bos_taurus	Rumen	China	dairy
SRR10765514	PRJNA597489	SRR10765514	Bos_taurus	Rumen	China	dairy
SRR10765515	PRJNA597489	SRR10765515	Bos_taurus	Rumen	China	dairy
SRR10765516	PRJNA597489	SRR10765516	Bos_taurus	Rumen	China	dairy
SRR10765517	PRJNA597489	SRR10765517	Bos_taurus	Rumen	China	dairy
SRR10765518	PRJNA597489	SRR10765518	Bos_taurus	Rumen	China	dairy
SRR10765519	PRJNA597489	SRR10765519	Bos_taurus	Rumen	China	dairy
SRR10765520	PRJNA597489	SRR10765520	Bos_taurus	Rumen	China	dairy
SRR10765521	PRJNA597489	SRR10765521	Bos_taurus	Rumen	China	dairy
SRR10765522	PRJNA597489	SRR10765522	Bos_taurus	Rumen	China	dairy
SRR10765523	PRJNA597489	SRR10765523	Bos_taurus	Rumen	China	dairy
SRR10765524	PRJNA597489	SRR10765524	Bos_taurus	Rumen	China	dairy
SRR10765525	PRJNA597489	SRR10765525	Bos_taurus	Rumen	China	dairy
SRR10765526	PRJNA597489	SRR10765526	Bos_taurus	Rumen	China	dairy
SRR10765527	PRJNA597489	SRR10765527	Bos_taurus	Rumen	China	dairy
SRR10765528	PRJNA597489	SRR10765528	Bos_taurus	Rumen	China	dairy
SRR10765529	PRJNA597489	SRR10765529	Bos_taurus	Rumen	China	dairy
SRR10765530	PRJNA597489	SRR10765530	Bos_taurus	Rumen	China	dairy
SRR10765531	PRJNA597489	SRR10765531	Bos_taurus	Rumen	China	dairy
SRR10765532	PRJNA597489	SRR10765532	Bos_taurus	Rumen	China	dairy
SRR10912533	PRJNA601318	SRR10912533	Capra_hircus	Rumen	China	na
SRR10912534	PRJNA601318	SRR10912534	Capra_hircus	Rumen	China	na
SRR10912535	PRJNA601318	SRR10912535	Capra_hircus	Rumen	China	na
SRR10912536	PRJNA601318	SRR10912536	Capra_hircus	Rumen	China	na
SRR10912537	PRJNA601318	SRR10912537	Capra_hircus	Rumen	China	na
SRR10912538	PRJNA601318	SRR10912538	Capra_hircus	Rumen	China	na
SRR10912539	PRJNA601318	SRR10912539	Capra_hircus	Rumen	China	na
SRR10912540	PRJNA601318	SRR10912540	Capra_hircus	Rumen	China	na
SRR10912541	PRJNA601318	SRR10912541	Capra_hircus	Rumen	China	na
SRR10912542	PRJNA601318	SRR10912542	Capra_hircus	Rumen	China	na
SRR11485365	PRJNA622657	SRR11485365	Capra_hircus	Rumen	China	na
SRR11485366	PRJNA622657	SRR11485366	Capra_hircus	Rumen	China	na
SRR11485367	PRJNA622657	SRR11485367	Capra_hircus	Rumen	China	na
SRR11485368	PRJNA622657	SRR11485368	Capra_hircus	Rumen	China	na
SRR11485369	PRJNA622657	SRR11485369	Capra_hircus	Rumen	China	na
SRR11485370	PRJNA622657	SRR11485370	Capra_hircus	Rumen	China	na
SRR11485371	PRJNA622657	SRR11485371	Capra_hircus	Rumen	China	na
SRR11485372	PRJNA622657	SRR11485372	Capra_hircus	Rumen	China	na
SRR11485373	PRJNA622657	SRR11485373	Capra_hircus	Rumen	China	na
SRR11485374	PRJNA622657	SRR11485374	Capra_hircus	Rumen	China	na
SRR11485375	PRJNA622657	SRR11485375	Capra_hircus	Rumen	China	na
SRR11485376	PRJNA622657	SRR11485376	Capra_hircus	Rumen	China	na
SRR11585054	PRJNA627251	SRR11585054	Bos_taurus	Rumen	USA	beef
SRR11585055	PRJNA627251	SRR11585055	Bos_taurus	Rumen	USA	beef
SRR11585056	PRJNA627251	SRR11585056	Bos_taurus	Rumen	USA	beef
SRR11585057	PRJNA627251	SRR11585057	Bos_taurus	Rumen	USA	beef
SRR11585058	PRJNA627251	SRR11585058	Bos_taurus	Rumen	USA	beef
SRR11585059	PRJNA627251	SRR11585059	Bos_taurus	Rumen	USA	beef
SRR11585060	PRJNA627251	SRR11585060	Bos_taurus	Rumen	USA	beef
SRR11585061	PRJNA627251	SRR11585061	Bos_taurus	Rumen	USA	beef
SRR11585062	PRJNA627251	SRR11585062	Bos_taurus	Rumen	USA	beef
SRR11585063	PRJNA627251	SRR11585063	Bos_taurus	Rumen	USA	beef
SRR11585064	PRJNA627251	SRR11585064	Bos_taurus	Rumen	USA	beef
SRR11585065	PRJNA627251	SRR11585065	Bos_taurus	Rumen	USA	beef
SRR11585066	PRJNA627251	SRR11585066	Bos_taurus	Rumen	USA	beef
SRR11585067	PRJNA627251	SRR11585067	Bos_taurus	Rumen	USA	beef
SRR11585068	PRJNA627251	SRR11585068	Bos_taurus	Rumen	USA	beef
SRR11585069	PRJNA627251	SRR11585069	Bos_taurus	Rumen	USA	beef
SRR11585783	PRJNA627299	SRR11585783	Bos_taurus	Rumen	USA	beef
SRR11585784	PRJNA627299	SRR11585784	Bos_taurus	Rumen	USA	beef
SRR11585785	PRJNA627299	SRR11585785	Bos_taurus	Rumen	USA	beef
SRR11585786	PRJNA627299	SRR11585786	Bos_taurus	Rumen	USA	beef
SRR11585787	PRJNA627299	SRR11585787	Bos_taurus	Rumen	USA	beef
SRR11585788	PRJNA627299	SRR11585788	Bos_taurus	Rumen	USA	beef
SRR11585789	PRJNA627299	SRR11585789	Bos_taurus	Rumen	USA	beef
SRR11585790	PRJNA627299	SRR11585790	Bos_taurus	Rumen	USA	beef
SRR11585791	PRJNA627299	SRR11585791	Bos_taurus	Rumen	USA	beef
SRR11585792	PRJNA627299	SRR11585792	Bos_taurus	Rumen	USA	beef
SRR11585793	PRJNA627299	SRR11585793	Bos_taurus	Rumen	USA	beef
SRR11585794	PRJNA627299	SRR11585794	Bos_taurus	Rumen	USA	beef
SRR11585795	PRJNA627299	SRR11585795	Bos_taurus	Rumen	USA	beef
SRR11585796	PRJNA627299	SRR11585796	Bos_taurus	Rumen	USA	beef
SRR11585797	PRJNA627299	SRR11585797	Bos_taurus	Rumen	USA	beef
SRR11585798	PRJNA627299	SRR11585798	Bos_taurus	Rumen	USA	beef
SRR11585799	PRJNA627299	SRR11585799	Bos_taurus	Rumen	USA	beef
SRR11585800	PRJNA627299	SRR11585800	Bos_taurus	Rumen	USA	beef
SRR11585801	PRJNA627299	SRR11585801	Bos_taurus	Rumen	USA	beef
SRR11585802	PRJNA627299	SRR11585802	Bos_taurus	Rumen	USA	beef
SRR11585803	PRJNA627299	SRR11585803	Bos_taurus	Rumen	USA	beef
SRR11585804	PRJNA627299	SRR11585804	Bos_taurus	Rumen	USA	beef
SRR11585805	PRJNA627299	SRR11585805	Bos_taurus	Rumen	USA	beef
SRR11585806	PRJNA627299	SRR11585806	Bos_taurus	Rumen	USA	beef
SRR11585807	PRJNA627299	SRR11585807	Bos_taurus	Rumen	USA	beef
SRR11585808	PRJNA627299	SRR11585808	Bos_taurus	Rumen	USA	beef
SRR11585809	PRJNA627299	SRR11585809	Bos_taurus	Rumen	USA	beef
SRR11585810	PRJNA627299	SRR11585810	Bos_taurus	Rumen	USA	beef
SRR11585811	PRJNA627299	SRR11585811	Bos_taurus	Rumen	USA	beef
SRR11585812	PRJNA627299	SRR11585812	Bos_taurus	Rumen	USA	beef
SRR11585813	PRJNA627299	SRR11585813	Bos_taurus	Rumen	USA	beef
SRR11585814	PRJNA627299	SRR11585814	Bos_taurus	Rumen	USA	beef
SRR11585815	PRJNA627299	SRR11585815	Bos_taurus	Rumen	USA	beef
SRR11585816	PRJNA627299	SRR11585816	Bos_taurus	Rumen	USA	beef
SRR11585817	PRJNA627299	SRR11585817	Bos_taurus	Rumen	USA	beef
SRR11585818	PRJNA627299	SRR11585818	Bos_taurus	Rumen	USA	beef
SRR11585819	PRJNA627299	SRR11585819	Bos_taurus	Rumen	USA	beef
SRR11585820	PRJNA627299	SRR11585820	Bos_taurus	Rumen	USA	beef
SRR11585821	PRJNA627299	SRR11585821	Bos_taurus	Rumen	USA	beef
SRR11585822	PRJNA627299	SRR11585822	Bos_taurus	Rumen	USA	beef
SRR11585823	PRJNA627299	SRR11585823	Bos_taurus	Rumen	USA	beef
SRR11585824	PRJNA627299	SRR11585824	Bos_taurus	Rumen	USA	beef
SRR11585825	PRJNA627299	SRR11585825	Bos_taurus	Rumen	USA	beef
SRR11585826	PRJNA627299	SRR11585826	Bos_taurus	Rumen	USA	beef
SRR11585827	PRJNA627299	SRR11585827	Bos_taurus	Rumen	USA	beef
SRR11585828	PRJNA627299	SRR11585828	Bos_taurus	Rumen	USA	beef
SRR11585829	PRJNA627299	SRR11585829	Bos_taurus	Rumen	USA	beef
SRR11585830	PRJNA627299	SRR11585830	Bos_taurus	Rumen	USA	beef
SRR11585831	PRJNA627299	SRR11585831	Bos_taurus	Rumen	USA	beef
SRR11585832	PRJNA627299	SRR11585832	Bos_taurus	Rumen	USA	beef
SRR11699198	PRJNA630534	SRR11699198	Bos_taurus	Rumen	USA	dairy
SRR11699199	PRJNA630534	SRR11699199	Bos_taurus	Rumen	USA	dairy
SRR11699200	PRJNA630534	SRR11699200	Bos_taurus	Rumen	USA	dairy
SRR11699201	PRJNA630534	SRR11699201	Bos_taurus	Rumen	USA	dairy
SRR11699202	PRJNA630534	SRR11699202	Bos_taurus	Rumen	USA	dairy
SRR11699203	PRJNA630534	SRR11699203	Bos_taurus	Rumen	USA	dairy
SRR11699204	PRJNA630534	SRR11699204	Bos_taurus	Rumen	USA	dairy
SRR11699205	PRJNA630534	SRR11699205	Bos_taurus	Rumen	USA	dairy
SRR11699206	PRJNA630534	SRR11699206	Bos_taurus	Rumen	USA	dairy
SRR11699207	PRJNA630534	SRR11699207	Bos_taurus	Rumen	USA	dairy
SRR11699208	PRJNA630534	SRR11699208	Bos_taurus	Rumen	USA	dairy
SRR11699209	PRJNA630534	SRR11699209	Bos_taurus	Rumen	USA	dairy
SRR11699210	PRJNA630534	SRR11699210	Bos_taurus	Rumen	USA	dairy
SRR11699211	PRJNA630534	SRR11699211	Bos_taurus	Rumen	USA	dairy
SRR11699212	PRJNA630534	SRR11699212	Bos_taurus	Rumen	USA	dairy
SRR11699213	PRJNA630534	SRR11699213	Bos_taurus	Rumen	USA	dairy
SRR11699214	PRJNA630534	SRR11699214	Bos_taurus	Rumen	USA	dairy
SRR11699215	PRJNA630534	SRR11699215	Bos_taurus	Rumen	USA	dairy
SRR11699216	PRJNA630534	SRR11699216	Bos_taurus	Rumen	USA	dairy
SRR11699217	PRJNA630534	SRR11699217	Bos_taurus	Rumen	USA	dairy
SRR11699218	PRJNA630534	SRR11699218	Bos_taurus	Rumen	USA	dairy
SRR11699219	PRJNA630534	SRR11699219	Bos_taurus	Rumen	USA	dairy
SRR11699220	PRJNA630534	SRR11699220	Bos_taurus	Rumen	USA	dairy
SRR11699221	PRJNA630534	SRR11699221	Bos_taurus	Rumen	USA	dairy
SRR11699222	PRJNA630534	SRR11699222	Bos_taurus	Rumen	USA	dairy
SRR11699223	PRJNA630534	SRR11699223	Bos_taurus	Rumen	USA	dairy
SRR11699224	PRJNA630534	SRR11699224	Bos_taurus	Rumen	USA	dairy
SRR11784279	PRJNA631602	SRR11784279	Ovis_aries	Rumen	China	na
SRR11784280	PRJNA631602	SRR11784280	Ovis_aries	Rumen	China	na
SRR11784281	PRJNA631602	SRR11784281	Ovis_aries	Rumen	China	na
SRR11784282	PRJNA631602	SRR11784282	Ovis_aries	Rumen	China	na
SRR11784283	PRJNA631602	SRR11784283	Ovis_aries	Rumen	China	na
SRR11784284	PRJNA631602	SRR11784284	Ovis_aries	Rumen	China	na
SRR11784285	PRJNA631602	SRR11784285	Ovis_aries	Rumen	China	na
SRR11784286	PRJNA631602	SRR11784286	Ovis_aries	Rumen	China	na
SRR11784287	PRJNA631602	SRR11784287	Ovis_aries	Rumen	China	na
SRR11784288	PRJNA631602	SRR11784288	Ovis_aries	Rumen	China	na
SRR11784289	PRJNA631602	SRR11784289	Ovis_aries	Rumen	China	na
SRR11784290	PRJNA631602	SRR11784290	Ovis_aries	Rumen	China	na
SRR11784291	PRJNA631602	SRR11784291	Ovis_aries	Rumen	China	na
SRR11784292	PRJNA631602	SRR11784292	Ovis_aries	Rumen	China	na
SRR11784293	PRJNA631602	SRR11784293	Ovis_aries	Rumen	China	na
SRR11784294	PRJNA631602	SRR11784294	Ovis_aries	Rumen	China	na
SRR11784295	PRJNA631602	SRR11784295	Ovis_aries	Rumen	China	na
SRR11784296	PRJNA631602	SRR11784296	Ovis_aries	Rumen	China	na
SRR12021132	PRJNA639405	SRR12021132	Bos_taurus	Rumen	China	dairy
SRR12021133	PRJNA639405	SRR12021133	Bos_taurus	Rumen	China	dairy
SRR12021134	PRJNA639405	SRR12021134	Bos_taurus	Rumen	China	dairy
SRR12021135	PRJNA639405	SRR12021135	Bos_taurus	Rumen	China	dairy
SRR12021136	PRJNA639405	SRR12021136	Bos_taurus	Rumen	China	dairy
SRR12021137	PRJNA639405	SRR12021137	Bos_taurus	Rumen	China	dairy
SRR12021138	PRJNA639405	SRR12021138	Bos_taurus	Rumen	China	dairy
SRR12021139	PRJNA639405	SRR12021139	Bos_taurus	Rumen	China	dairy
SRR12021140	PRJNA639405	SRR12021140	Bos_taurus	Rumen	China	dairy
SRR12021141	PRJNA639405	SRR12021141	Bos_taurus	Rumen	China	dairy
SRR12021142	PRJNA639405	SRR12021142	Bos_taurus	Rumen	China	dairy
SRR12021143	PRJNA639405	SRR12021143	Bos_taurus	Rumen	China	dairy
SRR12021144	PRJNA639405	SRR12021144	Bos_taurus	Rumen	China	dairy
SRR12021145	PRJNA639405	SRR12021145	Bos_taurus	Rumen	China	dairy
SRR12021146	PRJNA639405	SRR12021146	Bos_taurus	Rumen	China	dairy
SRR12021147	PRJNA639405	SRR12021147	Bos_taurus	Rumen	China	dairy
SRR12021148	PRJNA639405	SRR12021148	Bos_taurus	Rumen	China	dairy
SRR12021149	PRJNA639405	SRR12021149	Bos_taurus	Rumen	China	dairy
SRR12021150	PRJNA639405	SRR12021150	Bos_taurus	Rumen	China	dairy
SRR12021151	PRJNA639405	SRR12021151	Bos_taurus	Rumen	China	dairy
SRR12021152	PRJNA639405	SRR12021152	Bos_taurus	Rumen	China	dairy
SRR12021153	PRJNA639405	SRR12021153	Bos_taurus	Rumen	China	dairy
SRR12021154	PRJNA639405	SRR12021154	Bos_taurus	Rumen	China	dairy
SRR12021155	PRJNA639405	SRR12021155	Bos_taurus	Rumen	China	dairy
SRR12444891	PRJNA656673	SRR12444891	Bos_taurus	Rumen	China	dairy
SRR12444892	PRJNA656673	SRR12444892	Bos_taurus	Rumen	China	dairy
SRR12444893	PRJNA656673	SRR12444893	Bos_taurus	Rumen	China	dairy
SRR12444894	PRJNA656673	SRR12444894	Bos_taurus	Rumen	China	dairy
SRR12444895	PRJNA656673	SRR12444895	Bos_taurus	Rumen	China	dairy
SRR12444896	PRJNA656673	SRR12444896	Bos_taurus	Rumen	China	dairy
