# Supplementary material for: Probing the eukaryotic microbes of ruminants with a deep-learning classifier and comprehensive protein databases
Source: HighWire-hosted journal article supplement (doi:10.1101/gr.279825.124), 2024-12-27
Supplement: Supplemental_Table_S4.xlsx [file Supplemental_Table_S4.xlsx]

## Sheet: protozoa_hydrogenase
Supplementary Table S4. Identified protozoal hydrogenase
Protein	Description	EC	PFAMs
149867|Water_deer_Abomasum-2__c285482|-|349|5.335e-95|1|4903|6228|6228[6228]:4903[4903]:1326[1326]	Iron only hydrogenase large subunit, C-terminal domain	1.12.7.2	Fe_hyd_lg_C,Fer4
149867|Water_deer_Abomasum-2__c285482|-|349|5.335e-95|1|4903|6228|6228[6228]:4903[4903]:1326[1326]	Iron only hydrogenase large subunit, C-terminal domain	1.12.7.2	Fe_hyd_lg_C,Fer4
3773881|Water_deer_Reticulum-3__c144644|+|316|4.582e-85|1|8909|9769|8909[8909]:9769[9769]:861[861]	Iron hydrogenase small subunit	1.12.7.2	Fe_hyd_SSU,Fe_hyd_lg_C,Fer4
3773881|Water_deer_Reticulum-3__c144644|+|316|4.582e-85|1|8909|9769|8909[8909]:9769[9769]:861[861]	Iron hydrogenase small subunit	1.12.7.2	Fe_hyd_SSU,Fe_hyd_lg_C,Fer4
7480131|Diplodinium.dentatum.SAG4_802_NT_7518|-|219|7.261e-56|2|4848|5493|5493[5493]:5293[5293]:201[201]|5249[5249]:4848[4848]:402[402]	4Fe-4S binding domain protein	1.12.7.2	Fe_hyd_lg_C,Fer4
5479197|Diplodinium.dentatum.SAG3_12217_ST_2415|+|98|1.93e-19|1|714|953|714[714]:953[953]:240[240]	Iron only hydrogenase large subunit, C-terminal domain	1.12.7.2	Fe_hyd_lg_C,Fer4
5479197|Diplodinium.dentatum.SAG3_12217_ST_2415|+|98|1.93e-19|1|714|953|714[714]:953[953]:240[240]	Iron only hydrogenase large subunit, C-terminal domain	1.12.7.2	Fe_hyd_lg_C,Fer4
7687291|Epidinium.cattanei.SAG2_15282_NT_1465|+|202|9.517e-51|1|965|1333|965[965]:1333[1333]:369[369]	4Fe-4S binding domain protein	1.12.7.2	Fe_hyd_lg_C,Fer4
11981691|ERR3224573_241923|-|263|4.128e-69|1|83|571|571[571]:83[83]:489[489]	Iron hydrogenase small subunit	1.12.7.2	Fe_hyd_SSU,Fe_hyd_lg_C,Fer4
173617|SRR12529325_260725|+|303|3.754e-81|1|17965|18897|17965[17965]:18897[18897]:933[933]	Iron only hydrogenase large subunit, C-terminal domain	1.12.7.2	Fe_hyd_lg_C,Fer4
7480131|Isotricha.intestinalis.SAG3_21_NT_85147|-|655|4.092e-187|1|27259|28368|28368[28368]:27259[27259]:1110[1110]	Hydrogenase	1.12.7.2	Fe_hyd_lg_C,Fer4
7480131|Isotricha.intestinalis.SAG3_21_NT_85147|-|655|4.092e-187|1|27259|28368|28368[28368]:27259[27259]:1110[1110]	Hydrogenase	1.12.7.2	Fe_hyd_lg_C,Fer4
6902472|ERR3211443_417414|+|192|9.746e-48|2|1516|2340|1516[1516]:1935[1935]:420[420]|1969[1969]:2340[2340]:372[372]	Hydrogenase	1.12.7.2	Fe_hyd_lg_C,Fer4
2623765|Ophryoscolex.caudatus.SAG5_1_NT_46962|-|120|4.602e-26|2|32845|33195|33195[33195]:33016[33016]:180[180]|32964[32964]:32845[32845]:120[120]	Iron only hydrogenase large subunit, C-terminal domain	1.12.7.2	Fe_hyd_lg_C,Fer4
3680809|ERR3201408_759081|-|72|1.295e-11|1|3395|3556|3556[3556]:3395[3395]:162[162]	Iron only hydrogenase large subunit, C-terminal domain	1.12.7.2	Fe_hyd_lg_C,Fer4
10623812|Diplodinium.dentatum.SAG4_9451_NT_3042|+|205|1.19e-51|1|1|396|1[1]:396[396]:396[396]	Iron only hydrogenase large subunit, C-terminal domain	1.12.7.2	Fe_hyd_lg_C,Fer4
10623812|Diplodinium.dentatum.SAG4_9451_NT_3042|+|205|1.19e-51|1|1|396|1[1]:396[396]:396[396]	Iron only hydrogenase large subunit, C-terminal domain	1.12.7.2	Fe_hyd_lg_C,Fer4
149867|ERR3201409_1932|-|339|5.463e-92|1|5334|6650|6650[6650]:5334[5334]:1317[1317]	Psort location Cytoplasmic, score 8.87	1.12.7.2	Fe_hyd_lg_C,Fer4
149867|ERR3201409_1932|-|339|5.463e-92|1|5334|6650|6650[6650]:5334[5334]:1317[1317]	Psort location Cytoplasmic, score 8.87	1.12.7.2	Fe_hyd_lg_C,Fer4
149867|ERR3201409_1932|-|339|5.463e-92|1|5334|6650|6650[6650]:5334[5334]:1317[1317]	Psort location Cytoplasmic, score 8.87	1.12.7.2	Fe_hyd_lg_C,Fer4
149867|ERR3201409_1932|-|339|5.463e-92|1|5334|6650|6650[6650]:5334[5334]:1317[1317]	Psort location Cytoplasmic, score 8.87	1.12.7.2	Fe_hyd_lg_C,Fer4
149867|ERR3201409_1932|-|339|5.463e-92|1|5334|6650|6650[6650]:5334[5334]:1317[1317]	Psort location Cytoplasmic, score 8.87	1.12.7.2	Fe_hyd_lg_C,Fer4
149867|ERR3201409_1932|-|339|5.463e-92|1|5334|6650|6650[6650]:5334[5334]:1317[1317]	Psort location Cytoplasmic, score 8.87	1.12.7.2	Fe_hyd_lg_C,Fer4
1710405|ERR3201414_685792|-|280|3.149e-74|2|1795|2459|2459[2459]:1899[1899]:561[561]|1848[1848]:1795[1795]:54[54]	Iron hydrogenase small subunit	1.12.7.2	Fe_hyd_SSU,Fe_hyd_lg_C,Fer4
1710405|ERR3201414_685792|-|280|3.149e-74|2|1795|2459|2459[2459]:1899[1899]:561[561]|1848[1848]:1795[1795]:54[54]	Iron hydrogenase small subunit	1.12.7.2	Fe_hyd_SSU,Fe_hyd_lg_C,Fer4
8574619|Ophryoscolex.caudatus.SAG10_809_NT_5067|+|49|0.0001087|1|3405|3527|3405[3405]:3527[3527]:123[123]	Iron hydrogenase small subunit	1.12.7.2	Fe_hyd_SSU,Fe_hyd_lg_C,Fer4
4781568|Ostracodinium.dentatum.SAG1_9303_ST_2121|-|155|1.339e-36|1|703|1050|1050[1050]:703[703]:348[348]	Iron only hydrogenase large subunit, C-terminal domain	1.12.7.2	Fe_hyd_lg_C,Fer4
6902472|Ostracodinium.gracile.SAG3_1_NT_45510|-|369|5.088e-101|1|33622|34890|34890[34890]:33622[33622]:1269[1269]	Hydrogenase	1.12.7.2	Fe_hyd_lg_C,Fer4
230430|SRR9006804_3144910|+|329|5.594e-89|1|2121|2783|2121[2121]:2783[2783]:663[663]	Iron only hydrogenase large subunit, C-terminal domain	1.12.7.2	Fe_hyd_lg_C,Fer4,Fer4_6
230430|SRR9006804_3144910|+|329|5.594e-89|1|2121|2783|2121[2121]:2783[2783]:663[663]	Iron only hydrogenase large subunit, C-terminal domain	1.12.7.2	Fe_hyd_lg_C,Fer4,Fer4_6
230430|SRR9006804_3144910|+|329|5.594e-89|1|2121|2783|2121[2121]:2783[2783]:663[663]	Iron only hydrogenase large subunit, C-terminal domain	1.12.7.2	Fe_hyd_lg_C,Fer4,Fer4_6
230430|SRR9006804_3144910|+|329|5.594e-89|1|2121|2783|2121[2121]:2783[2783]:663[663]	Iron only hydrogenase large subunit, C-terminal domain	1.12.7.2	Fe_hyd_lg_C,Fer4,Fer4_6
4602520|ERR3201408_719478|-|253|4.227e-66|1|24|1076|1076[1076]:24[24]:1053[1053]	Iron only hydrogenase large subunit, C-terminal domain	1.12.7.2	Fe_hyd_lg_C,Fer4
10322972|Isotricha.jalaludinii.SAG3_141_ST_80590|-|295|9.61e-79|1|1134|1931|1931[1931]:1134[1134]:798[798]	4Fe-4S binding domain protein	1.12.7.2	Fe_hyd_lg_C,Fer4
10322972|Isotricha.jalaludinii.SAG3_141_ST_80590|-|295|9.61e-79|1|1134|1931|1931[1931]:1134[1134]:798[798]	4Fe-4S binding domain protein	1.12.7.2	Fe_hyd_lg_C,Fer4
10322972|Isotricha.jalaludinii.SAG3_141_ST_80590|-|295|9.61e-79|1|1134|1931|1931[1931]:1134[1134]:798[798]	4Fe-4S binding domain protein	1.12.7.2	Fe_hyd_lg_C,Fer4
10623812|Entodinium.longinucleatum.SAGT1_7771_NT_2456|+|195|1.218e-48|1|0|416|0[0]:416[416]:417[417]	Psort location Cytoplasmic, score 8.87	1.12.7.2	Fe_hyd_lg_C,Fer4
10623812|Entodinium.longinucleatum.SAGT1_7771_NT_2456|+|195|1.218e-48|1|0|416|0[0]:416[416]:417[417]	Psort location Cytoplasmic, score 8.87	1.12.7.2	Fe_hyd_lg_C,Fer4
10623812|Entodinium.longinucleatum.SAGT1_7771_NT_2456|+|195|1.218e-48|1|0|416|0[0]:416[416]:417[417]	Psort location Cytoplasmic, score 8.87	1.12.7.2	Fe_hyd_lg_C,Fer4
149867|SRR948122_388987|-|602|3.686e-171|1|99|1430|1430[1430]:99[99]:1332[1332]	4Fe-4S binding domain protein	1.12.7.2	Fe_hyd_lg_C,Fer4
149867|SRR948122_388987|-|602|3.686e-171|1|99|1430|1430[1430]:99[99]:1332[1332]	4Fe-4S binding domain protein	1.12.7.2	Fe_hyd_lg_C,Fer4
